# Supplementary material for: Molecular iodine-mediated formal [2+1+1+1] cycloaddition access to pyrrolo[2,1-a]isoquinolines with DMSO as the methylene source
Source: Royal Society of Chemistry journal article supplement (doi:10.1039/c8cc06908e), 2018-01-01

# Supporting Information

## Molecular Iodine-Mediated Formal [2+1+1+1] Cycloaddition Access to Pyrrolo[2,1-*a*]isoquinolins with DMSO as Methylene Source

Kailu Zheng,<sup>‡ab</sup> Shiyi Zhuang,<sup>‡a</sup> Wenming Shu,<sup>a</sup> Yandong Wu,<sup>a</sup> Chuluo Yang\*<sup>b</sup> and Anxin Wu\*<sup>a</sup>

<sup>a</sup> Key Laboratory of Pesticide & Chemical Biology, Ministry of Education, College of Chemistry, Central China Normal University, Wuhan 430079, P. R. China.

<sup>b</sup> Hubei Key Laboratory on Organic and Polymeric Optoelectronic Materials, Department of Chemistry, Wuhan University, Wuhan 430072, P. R. China.

# Supporting Information

## Table of Contents

|                                                                                     |         |
|-------------------------------------------------------------------------------------|---------|
| 1. General methods                                                                  | S3      |
| 2. General experimental details                                                     | S3      |
| 3. Cross-coupling experiment                                                        | S4      |
| 4. Control experiments and HRMS                                                     | S5-S6   |
| 5. The crystallographic data                                                        | S7-S9   |
| 6. $^1\text{H}$ NMR, $^{13}\text{C}$ NMR, HRMS, and IR spectra data of the products | S10-S21 |
| 7. <b>Appendix:</b> Spectral copies of $^1\text{H}$ NMR, and $^{13}\text{C}$ NMR    | S22-S58 |

## Experimental Section

### 1. General methods

All of the substrates and reagents were commercially available and used without further purification. TLC analysis was performed using pre-coated glass plates. Flash column chromatography was performed on silica gel (200–300 mesh). IR spectra were recorded as KBr pellets with absorption in  $\text{cm}^{-1}$ .  $^1\text{H}$  NMR spectra were determined at 25 °C on a Varian Mercury 400 or 600 MHz spectrometer. Chemical shifts were provided in ppm relative to the internal standard of tetramethylsilane (TMS).  $^{13}\text{C}$  spectra were recorded in  $\text{CDCl}_3$  or  $\text{DMSO}-d_6$  on 100/150 MHz NMR spectrometers and resonances ( $\delta$ ) in ppm. HRMS were obtained on an Apex-Ultra MS equipped with an atmospheric-pressure chemical ionization source. The melting points were determined using XT-4 apparatus and recorded without correction. The X-ray crystal-structures were obtained on a Bruker APEX DUO CCD system.

### 2. General experimental details

General procedure for the synthesis of desired product (**3a** as an Example). A mixture of acetophenone **1a** (120 mg, 1.0 mmol), 1,2,3,4-tetrahydroisoquinoline **2** (133 mg, 1.0 mmol), and iodine (127 mg, 0.5 mmol) was added to DMSO (5 mL) in sealed tube and stirred at 120 °C for 2.5 h. After the completion of the reaction, 30 mL of  $\text{Na}_2\text{S}_2\text{O}_3$  (aq) was then added to the mixture, which was then extracted with EtOAc three times ( $3 \times 30$  mL). The product was dried over anhydrous  $\text{Na}_2\text{SO}_4$  and concentrated under reduced pressure. The residue was then purified by column chromatography on silica gel (petroleum ether/ EtOAc = 8:1) to afford the desired product **3a**.

### 3. Cross-coupling experiment

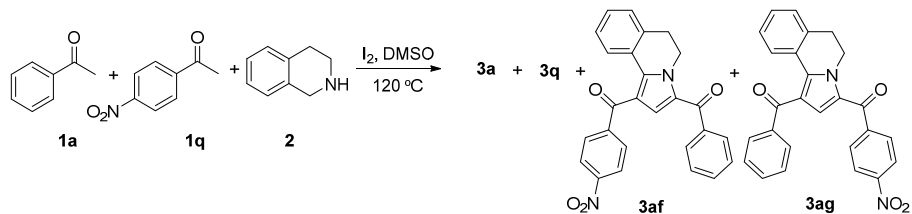

We investigated the cross-coupling reaction using acetophenone **1a**, 4-NO<sub>2</sub>-phenylmethyl ketone **1q** and **2** under the standard conditions, the reaction delivered **3a**, **3q** and another two cross-coupling products **3af** and **3ag**. The structure of **3ag** was further confirmed by single-crystal X-ray diffraction analysis (**Figure S4**).

#### 4. Control experiments and HRMS

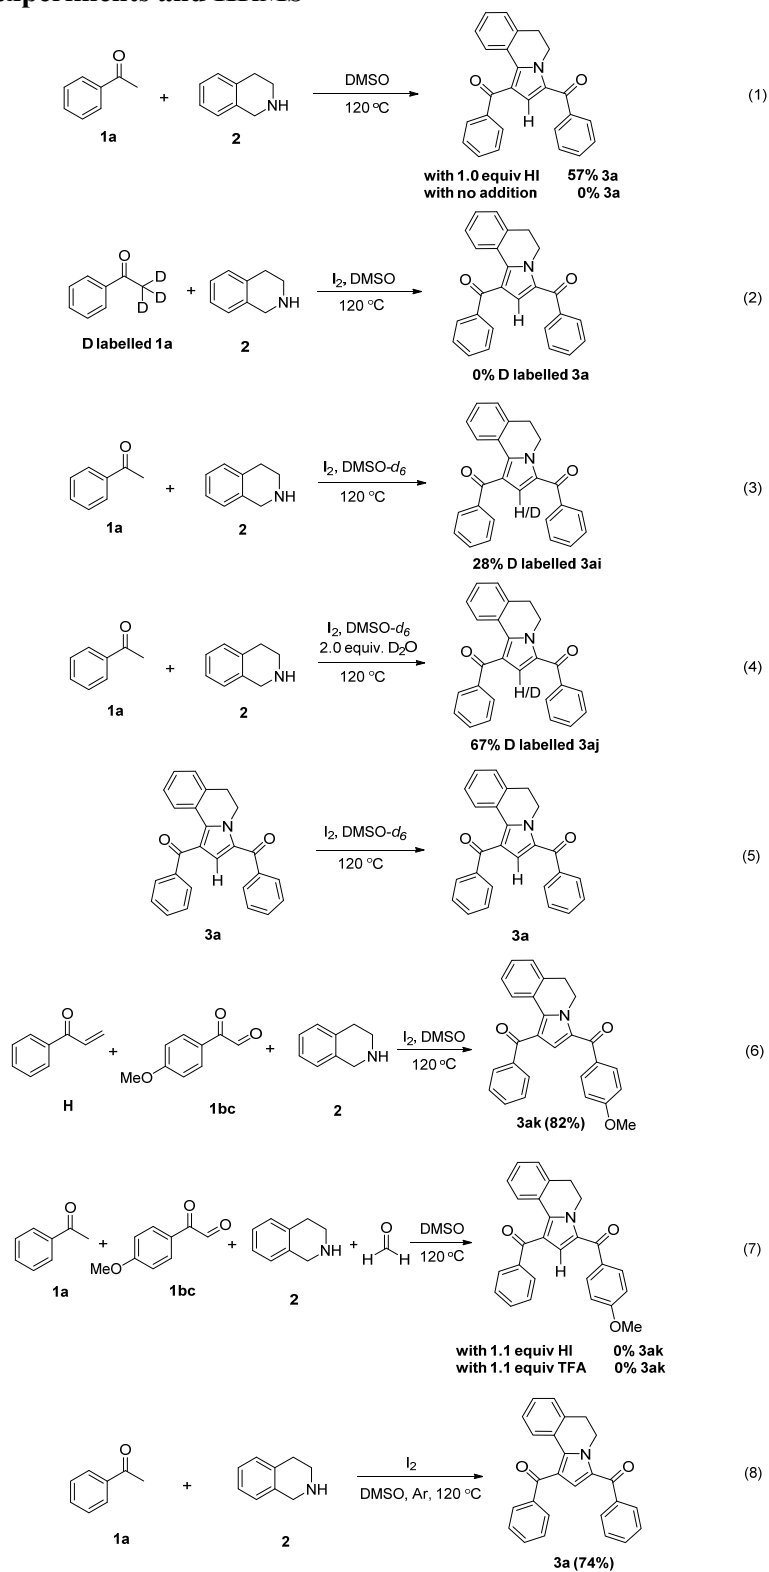

To gain a deeper understanding on the mechanism, several isotope labeling experiments were performed. Treating D labelled **1a-d<sub>3</sub>** with **2** in standard conditions, no deuterated product **3a** was

detected (eq 2). When this reaction was conducted in DMSO-*d*<sub>6</sub>, we isolated 28% D labelled **3ai** (eq 3), which was confirmed by <sup>1</sup>H NMR spectra. Then we added 2.0 equiv. D<sub>2</sub>O in DMSO-*d*<sub>6</sub> under standard conditions, 67% D labelled **3aj** was isolated (eq 4). **3a** could not transform into D labelled **3a** when heated in DMSO-*d*<sub>6</sub>. These results might indicate that the C-H in the pyrrol ring of **3a** is stable, and the H-exchange might be happened during the formation of compound **E**. Furthermore, intermediate **G** was synthesized and could be converted to **3ak** in 82% yield (eq 6). It was reported that α,β-unsaturated carbonyl compound could be obtained from formaldehyde and ketones.<sup>1</sup> However, the reaction of formaldehyde with **1a**, **1bc** and **2** did not result in the formation of **3ak** in the presence of HI or TFA, these results confirmed that DMSO as a source of methylene. We also conducted this reaction under Ar atmosphere, and the corresponding product **3a** could be obtained in 74% yield, indicating that I<sub>2</sub> is the oxidant in the final oxidation process.<sup>2</sup>

**ZKL348:** HRMS (ESI) m/z calcd for C<sub>24</sub><sup>13</sup>C<sub>2</sub>H<sub>20</sub>NO<sub>2</sub><sup>+</sup> (M+H)<sup>+</sup> 380.15556, found 380.15549.

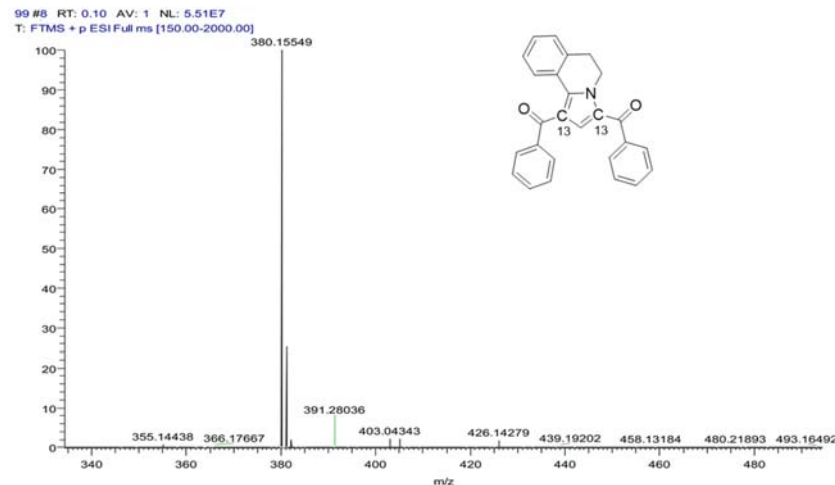

**Figure S1.** HRMS of **3ah**.

## Reference

1. A. Bugarin, K. D. Jones and B. T. Connell, *Chem. Commun.* 2010, **46**, 1715-1717.
2. (a) Q. H. Gao, Z. Fei, Y. P. Zhu, M. Lian, F. C. Jia, M. C. Liu, N. F. She and A. X. Wu, *Tetrahedron* 2013, **69**, 22–28; (b) J. C. Xiang, M. Wang, Y. Cheng and A. X. Wu, *Org. Lett.* 2016, **18**, 24-27

## 5. The crystallographic data

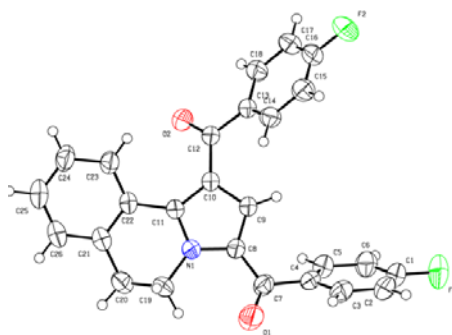

**Figure S2.** X-ray structural details of **3i**: (CCDC 1545082).

|                      |                             |                            |                                |                                             |
|----------------------|-----------------------------|----------------------------|--------------------------------|---------------------------------------------|
| Empirical formula    | $C_{26}H_{17}F_2NO_2$       |                            | Absorption coefficient         | $0.100 \text{ mm}^{-1}$                     |
| Formula weight       | 413.4                       |                            | F(000)                         | 428                                         |
| Temperature          | 273(2) K                    |                            | Crystal size                   | $0.22 \times 0.20 \times 0.18 \text{ mm}^3$ |
| Wavelength           | $0.71073 \text{ \AA}$       |                            | Reflections collected          | 10962                                       |
| Crystal system       | Triclinic,                  |                            | Independent reflections        | 6302 [R(int) = 0.0214]                      |
| Space group          | P-1                         |                            | Max. and min. transmission     | 0.9850 and 0.9817                           |
| Unit cell dimensions | $a = 8.821(3) \text{ \AA}$  | $\alpha = 81.907(5)^\circ$ | Refinement method              | Full-matrix least-squares on $F^2$          |
|                      | $b = 11.239(4) \text{ \AA}$ | $\beta = 70.268(5)^\circ$  | Data / restraints / parameters | 6302 / 0 / 280                              |
|                      | $c = 11.410(4) \text{ \AA}$ | $\gamma = 69.729(5)^\circ$ | Goodness-of-fit on $F^2$       | 0.969                                       |
| Volume               | $998.4(6) \text{ \AA}^3$    |                            | Final R indices [I>2sigma(I)]  | R1 = 0.0538, wR2 = 0.1776                   |
| Z                    | 2                           |                            | R indices (all data)           | R1 = 0.0735, wR2 = 0.2073                   |
| Density (calculated) | $1.375 \text{ Mg/m}^3$      |                            | Largest diff. peak and hole    | 0.279 and $-0.314 \text{ e.\AA}^{-3}$       |

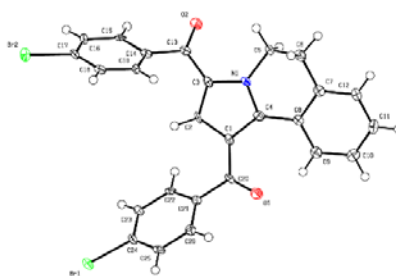

**Figure S3.** X-ray structural details of **3m**: (CCDC 1842947).

|                      |                                                                 |                 |                                   |                                    |
|----------------------|-----------------------------------------------------------------|-----------------|-----------------------------------|------------------------------------|
| Empirical formula    | C <sub>26</sub> H <sub>17</sub> Br <sub>2</sub> NO <sub>2</sub> |                 | Absorption coefficient            | 3.826 mm <sup>-1</sup>             |
| Formula weight       | 535.2                                                           |                 | F(000)                            | 1064                               |
| Temperature          | 100(1) K                                                        |                 | Crystal size                      | 0.13 x 0.12 x 0.11 mm <sup>3</sup> |
| Wavelength           | 0.71073 Å                                                       |                 | Reflections collected             | 10593                              |
| Crystal system       | monoclinic                                                      |                 | Independent reflections           | 4967 [R(int) = 0.0555]             |
| Space group          | P2 <sub>1</sub> /c                                              |                 | Max. and min. transmission        |                                    |
| Unit cell dimensions | a = 8.735(8) Å                                                  | α = 90°         | 2θ range for data collection      | 4.124 to 58.978°                   |
|                      | b = 22.115(14) Å                                                | β = 107.507(9)° | Data / restraints / parameters    | 4967 / 0 / 280                     |
|                      | c = 11.575(9) Å                                                 | γ = 90°         | Goodness-of-fit on F <sup>2</sup> | 1.044                              |
| Volume               | 2132.4(3) Å <sup>3</sup>                                        |                 | Final R indices [I > 2σ(I)]       | R1 = 0.0513, wR2 = 0.0849          |
| Z                    | 4                                                               |                 | R indices (all data)              | R1 = 0.0760, wR2 = 0.0961          |
| Density (calculated) | 1.667 Mg/m <sup>3</sup>                                         |                 | Largest diff. peak and hole       | 0.82 and -0.8 e.Å <sup>-3</sup>    |



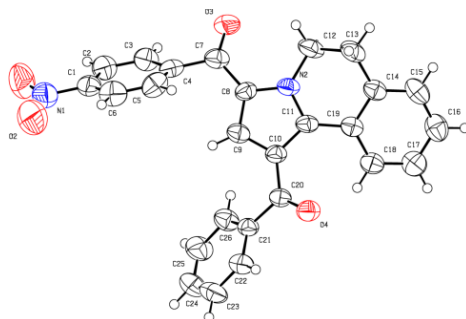

**Figure S4.** X-ray structural details of **3ag**: (CCDC 1555924).

|                      |                              |                          |                                |                                                |
|----------------------|------------------------------|--------------------------|--------------------------------|------------------------------------------------|
| Empirical formula    | $C_{26}H_{18}N_2O_4$         |                          | Absorption coefficient         | $0.093 \text{ mm}^{-1}$                        |
| Formula weight       | 422.42                       |                          | F(000)                         | 880                                            |
| Temperature          | 295(2) K                     |                          | Crystal size                   | $0.130 \times 0.100 \times 0.030 \text{ mm}^3$ |
| Wavelength           | $0.71073 \text{ \AA}$        |                          | Reflections collected          | 10874                                          |
| Crystal system       | Monoclinic                   |                          | Independent reflections        | 3543 [R(int) = 0.1139]                         |
| Space group          | $P2_1/c$                     |                          | Max. and min. transmission     |                                                |
| Unit cell dimensions | $a = 11.821(15) \text{ \AA}$ | $\alpha = 90^\circ$      | Refinement method              | Full-matrix least-squares on $F^2$             |
|                      | $b = 9.242(11) \text{ \AA}$  | $\beta = 92.57(2)^\circ$ | Data / restraints / parameters | 3543 / 0 / 290                                 |
|                      | $c = 18.97(2) \text{ \AA}$   | $\gamma = 90^\circ$      | Goodness-of-fit on $F^2$       | 1.070                                          |
| Volume               | $2071(4) \text{ \AA}^3$      |                          | Final R indices [I > 2σ(I)]    | R1 = 0.0850, wR2 = 0.2373                      |
| Z                    | 4                            |                          | R indices (all data)           | R1 = 0.1384, wR2 = 0.2872                      |
| Density (calculated) | $1.355 \text{ Mg/m}^3$       |                          | Largest diff. peak and hole    | 0.337 and $-0.353 \text{ e. \AA}^{-3}$         |

## 6. Spectroscopic data

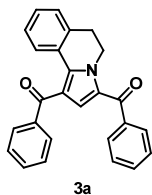

(5,6-dihydropyrrolo[2,1-*a*]isoquinoline-1,3-diyl)bis(phenylmethanone) (**3a**): light yellow solid; 150.8 mg (yield 80%); mp 127-130 °C; IR (KBr): 3717, 3042, 2933, 2847, 1629, 1473, 1426, 1320, 1288, 1271, 1137, 989, 843, 772  $\text{cm}^{-1}$ ;  $^1\text{H}$  NMR (600 MHz,  $\text{CDCl}_3$ )  $\delta$  (ppm) 7.90 (d,  $J = 7.8$  Hz, 2H), 7.82 (t,  $J = 7.8$  Hz, 3H), 7.56-7.52 (m, 2H), 7.44 (q,  $J = 7.2$  Hz, 4H), 7.28 (d,  $J = 4.8$  Hz, 2H), 7.17-7.14 (m, 1H), 6.94 (s, 1H), 4.73 (t,  $J = 7.2$  Hz, 2H), 3.15 (t,  $J = 7.8$  Hz, 2H);  $^{13}\text{C}$  NMR (150 MHz,  $\text{CDCl}_3$ )  $\delta$  (ppm) 192.2, 186.0, 139.0, 138.6, 134.1, 132.5, 132.0, 129.8, 129.2, 129.1, 128.5, 128.2, 127.7, 127.6, 126.9, 126.5, 126.2, 120.1, 42.8, 29.2; HRMS (ESI):  $m/z$  [ $\text{M} + \text{H}$ ] $^+$  calcd for  $\text{C}_{26}\text{H}_{20}\text{NO}_2$ : 378.1489; found: 378.1490.

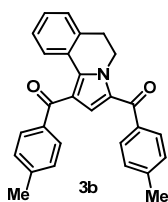

(5,6-dihydropyrrolo[2,1-*a*]isoquinoline-1,3-diyl)bis(*p*-tolylmethanone) (**3b**): Yellow solid; 151.9 mg (yield 75%); mp 138-141 °C; IR (KBr): 3453, 2922, 1627, 1605, 1529, 1478, 1419, 1385, 1266, 1218, 1174, 960, 885, 751, 617  $\text{cm}^{-1}$ ;  $^1\text{H}$  NMR (600 MHz,  $\text{CDCl}_3$ )  $\delta$  (ppm) 7.81 (d,  $J = 7.8$  Hz, 3H), 7.74 (d,  $J = 7.8$  Hz, 2H), 7.28-7.25 (m, 3H), 7.23 (d,  $J = 3.6$  Hz, 2H), 7.22 (s, 1H), 7.19-7.16 (m, 1H), 6.92 (s, 1H), 4.70 (t,  $J = 6.6$  Hz, 2H), 3.14 (t,  $J = 6.0$  Hz, 2H), 2.41 (s, 3H), 2.40 (s, 3H);  $^{13}\text{C}$  NMR (150 MHz,  $\text{CDCl}_3$ )  $\delta$  (ppm) 192.1, 185.9, 143.4, 142.7, 138.2, 136.5, 136.1, 134.1, 130.1, 129.5, 129.0, 129.0, 128.6, 127.6, 127.0, 126.7, 125.8, 120.3, 42.8, 29.3, 21.6, 21.6; HRMS (ESI):  $m/z$  [ $\text{M} + \text{H}$ ] $^+$  calcd for  $\text{C}_{28}\text{H}_{24}\text{NO}_2$ : 406.1802; found: 406.1788.

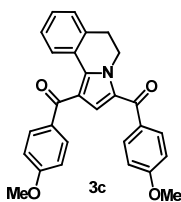

(5,6-dihydropyrrolo[2,1-*a*]isoquinoline-1,3-diyl)bis((4-methoxyphenyl)methanone) (**3c**): Yellow solid; 152.9 mg (yield 70%); mp 112-114 °C; IR (KBr): 3451, 2922, 1724, 1629, 1550, 1513, 1465, 1384, 1256, 1168, 1129, 762, 616, 566  $\text{cm}^{-1}$ ;  $^1\text{H}$  NMR (600 MHz,  $\text{CDCl}_3$ )  $\delta$  (ppm) 7.92 (d,  $J = 8.4$  Hz, 2H), 7.86 (d,  $J = 8.4$  Hz, 2H), 7.75 (d,  $J = 7.8$  Hz, 1H), 7.28-7.24 (m, 2H), 7.17 (t,  $J = 7.8$  Hz, 1H), 6.94 (d,  $J = 7.8$  Hz, 2H), 6.91 (d,  $J = 8.4$  Hz, 3H), 4.66 (t,  $J = 6.6$  Hz, 2H), 3.86 (s, 3H), 3.85 (s, 3H), 3.13 (t,  $J = 6.6$  Hz, 2H);  $^{13}\text{C}$  NMR (150 MHz,  $\text{CDCl}_3$ )  $\delta$  (ppm) 191.3, 184.9, 163.2, 162.8, 137.6, 134.0, 132.2, 131.7, 131.6, 131.3, 128.8, 128.6, 127.6, 127.4, 126.9, 126.7, 124.9, 120.2, 113.5, 55.4, 42.8, 29.3; HRMS (ESI):  $m/z$  [ $\text{M} + \text{H}$ ] $^+$  calcd for  $\text{C}_{28}\text{H}_{24}\text{NO}_4$ : 438.1700; found: 438.1698.

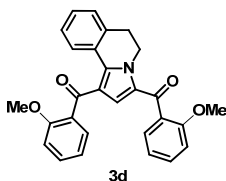

(5,6-dihydropyrrolo[2,1-*a*]isoquinoline-1,3-diyl)bis((2-methoxyphenyl)methanone) (**3d**): Yellow oil; 152.7 mg (yield 70%); IR (KBr): 3450, 2932, 1631, 1597, 1523, 1486, 1435, 1281, 1247, 1022, 960, 886, 755, 660  $\text{cm}^{-1}$ ;  $^1\text{H}$  NMR (600 MHz,  $\text{CDCl}_3$ )  $\delta$  (ppm) 8.14 (d,  $J = 8.4$  Hz, 1H), 7.43 (d,  $J = 7.2$  Hz, 1H), 7.38-7.34 (m, 3H), 7.19 (t,  $J = 7.8$  Hz, 2H), 6.93 (q,  $J = 7.8$  Hz, 4H), 6.85 (d,  $J = 8.4$  Hz, 1H), 6.91 (s, 1H), 4.79 (t,  $J = 6.6$  Hz, 2H), 3.78 (s, 3H), 3.70 (s, 3H), 3.09 (t,  $J = 6.6$  Hz, 2H);  $^{13}\text{C}$  NMR (150 MHz,  $\text{CDCl}_3$ )  $\delta$  (ppm) 190.8, 185.7, 157.4, 156.9, 139.1, 134.4, 132.0, 131.4, 130.0, 129.9, 129.3, 129.2, 129.1, 128.3, 128.0, 127.1, 126.6, 126.6, 126.5, 122.1, 120.0, 119.7, 111.3, 55.5, 55.4, 42.5, 29.2; HRMS (ESI):  $m/z$   $[\text{M} + \text{H}]^+$  calcd for  $\text{C}_{28}\text{H}_{24}\text{NO}_4$ : 438.1700; found: 438.1720.

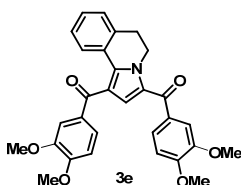

(5,6-dihydropyrrolo[2,1-*a*]isoquinoline-1,3-diyl)bis((3,4-dimethoxyphenyl)methanone) (**3e**): Yellow solid; 186.4 mg (yield 75%); mp 145-147  $^{\circ}\text{C}$ ; IR (KBr): 3447, 2957, 2924, 2852, 1628, 1595, 1511, 1450, 1266, 1169, 1137, 1023, 768  $\text{cm}^{-1}$ ;  $^1\text{H}$  NMR (600 MHz,  $\text{CDCl}_3$ )  $\delta$  (ppm) 7.72 (d,  $J = 7.8$  Hz, 1H), 7.56 (s, 1H), 7.55-7.50 (m, 2H), 7.46 (s, 1H), 7.28-7.24 (m, 2H), 7.18 (t,  $J = 7.2$  Hz, 1H), 6.97 (s, 1H), 6.89 (d,  $J = 8.4$  Hz, 1H), 6.84 (d,  $J = 8.4$  Hz, 1H), 4.67 (t,  $J = 6.6$  Hz, 2H), 3.95 (s, 6H), 3.93 (s, 3H), 3.91 (s, 3H), 3.15 (t,  $J = 6.6$  Hz, 2H);  $^{13}\text{C}$  NMR (150 MHz,  $\text{CDCl}_3$ )  $\delta$  (ppm) 191.2, 184.8, 153.0, 152.5, 148.8, 148.7, 137.7, 133.9, 131.7, 131.3, 128.8, 128.6, 127.6, 127.4, 126.9, 126.7, 125.1, 124.9, 124.0, 120.1, 111.6, 111.5, 109.7, 109.7, 56.0, 55.9, 55.9, 42.8, 29.2; HRMS (ESI):  $m/z$   $[\text{M} + \text{H}]^+$  calcd for  $\text{C}_{30}\text{H}_{28}\text{NO}_6$ : 498.1911; found: 498.1914.

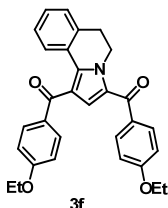

(5,6-dihydropyrrolo[2,1-*a*]isoquinoline-1,3-diyl)bis((4-ethoxyphenyl)methanone) (**3f**): Light yellow solid; 174.5 mg (yield 75%); mp 135-138  $^{\circ}\text{C}$ ; IR (KBr): 3443, 2926, 1624, 1600, 1508, 1445, 1394, 1306, 1253, 1168, 1114, 1042, 961, 886, 846, 764  $\text{cm}^{-1}$ ;  $^1\text{H}$  NMR (600 MHz,  $\text{CDCl}_3$ )  $\delta$  (ppm) 7.90 (d,  $J = 8.4$  Hz, 2H), 7.85 (d,  $J = 7.8$  Hz, 2H), 7.75 (d,  $J = 7.8$  Hz, 1H), 7.27-7.23 (m, 2H), 7.17 (t,  $J = 7.2$  Hz, 1H), 6.92 (d,  $J = 8.4$  Hz, 3H), 6.89 (d,  $J = 8.4$  Hz, 2H), 4.66 (t,  $J = 6.6$  Hz, 2H), 4.08 (q,  $J = 6.0$  Hz, 4H), 3.13 (t,  $J = 6.6$  Hz, 2H), 1.43 (q,  $J = 6.0$  Hz, 6H);  $^{13}\text{C}$  NMR (150 MHz,  $\text{CDCl}_3$ )  $\delta$  (ppm) 191.3, 184.9, 162.6, 162.2, 137.5, 133.9, 132.2, 131.6, 131.4, 131.1, 128.7,

128.6, 127.6, 127.4, 126.9, 126.7, 124.9, 120.2, 113.9, 63.6, 63.6, 42.7, 29.3, 14.6, 14.6; HRMS (ESI):  $m/z$   $[M + H]^+$  calcd for  $C_{30}H_{28}NO_4$ : 466.2013; found: 466.2012.

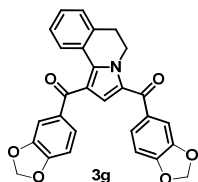

(5,6-dihydropyrrolo[2,1-*a*]isoquinoline-1,3-diyl)bis(benzo[*d*][1,3]dioxol-5-ylmethanone) (**3g**): Yellow solid; 146.5 mg (yield 63%); mp 119-121 °C; IR (KBr): 3444, 2924, 1628, 1600, 1502, 1482, 1446, 1395, 1257, 1164, 1114, 1038, 931, 765  $cm^{-1}$ ;  $^1H$  NMR (600 MHz,  $CDCl_3$ )  $\delta$  (ppm) 7.71 (d,  $J = 7.8$  Hz, 1H), 7.48 (d,  $J = 8.4$  Hz, 1H), 7.45 (d,  $J = 9.6$  Hz, 2H), 7.35 (s, 1H), 7.28-7.24 (m, 2H), 7.10-7.16 (m, 1H), 6.91 (s, 1H), 6.85 (d,  $J = 7.8$  Hz, 1H), 6.80 (d,  $J = 8.4$  Hz, 1H), 6.05 (s, 2H), 6.04 (s, 2H), 4.64 (t,  $J = 6.0$  Hz, 2H), 3.13 (t,  $J = 6.0$  Hz, 2H);  $^{13}C$  NMR (150 MHz,  $CDCl_3$ )  $\delta$  (ppm) 190.8, 184.3, 151.5, 151.1, 147.9, 147.7, 137.8, 133.9, 133.3, 133.1, 128.9, 128.5, 127.6, 127.3, 126.9, 126.6, 126.6, 125.4, 124.9, 120.0, 109.4, 109.3, 107.6, 107.6, 42.8, 29.2; HRMS (ESI):  $m/z$   $[M + H]^+$  calcd for  $C_{28}H_{20}NO_6$ : 466.1285; found: 466.1288.

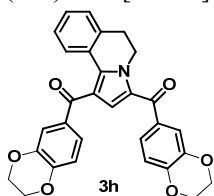

(5,6-dihydropyrrolo[2,1-*a*]isoquinoline-1,3-diyl)bis((2,3-dihydrobenzo[*b*][1,4]dioxin-6-yl)methanone) (**3h**): Yellow oil; 179.9 mg (yield 73%); IR (KBr): 3450, 2923, 1629, 1578, 1502, 1446, 1319, 1288, 1260, 1065, 889, 762  $cm^{-1}$ ;  $^1H$  NMR (600 MHz,  $CDCl_3$ )  $\delta$  (ppm) 7.75 (d,  $J = 7.2$  Hz, 1H), 7.49 (s, 1H), 7.45 (d,  $J = 8.4$  Hz, 1H), 7.40 (t,  $J = 8.4$  Hz, 2H), 7.25-7.23 (m, 2H), 7.19-7.15 (m, 1H), 6.94 (s, 1H), 6.88 (q,  $J = 7.8$  Hz, 2H), 4.63 (t,  $J = 6.0$  Hz, 2H), 4.28 (s, 4H), 4.76 (s, 2H), 4.25 (s, 2H), 3.11 (t,  $J = 6.0$  Hz, 2H);  $^{13}C$  NMR (150 MHz,  $CDCl_3$ )  $\delta$  (ppm) 191.0, 184.5, 147.7, 147.2, 143.1, 143.0, 137.7, 133.9, 132.4, 132.2, 128.8, 128.4, 127.6, 127.3, 126.9, 126.7, 125.0, 124.2, 123.4, 120.0, 119.3, 118.8, 116.8, 64.5, 64.5, 64.0, 64.0, 42.7, 29.2; HRMS (ESI):  $m/z$   $[M + H]^+$  calcd for  $C_{30}H_{24}NO_6$ : 494.1598; found: 494.1625.

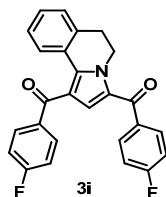

(5,6-dihydropyrrolo[2,1-*a*]isoquinoline-1,3-diyl)bis((4-fluorophenyl)methanone) (**3i**): Light yellow solid; 169.4 mg (yield 82%); mp 119-121 °C; IR (KBr): 3451, 2950, 2919, 2867, 2839, 1633, 1505, 1458, 1376, 1218, 1154, 1127, 771  $cm^{-1}$ ;  $^1H$  NMR (600 MHz,  $CDCl_3$ )  $\delta$  (ppm) 7.92 (t,  $J = 6.0$  Hz, 2H), 7.86 (t,  $J = 6.0$  Hz, 2H), 7.74 (d,  $J = 7.8$  Hz, 1H), 7.29-7.26 (m, 2H), 7.20-7.17 (m, 1H), 7.13 (t,  $J = 8.4$  Hz, 2H), 7.10 (t,  $J = 8.4$  Hz, 2H), 6.91 (s, 1H), 4.69 (t,  $J = 6.0$  Hz, 2H), 3.14 (t,  $J = 6.0$  Hz, 2H);  $^{13}C$  NMR (150 MHz,  $CDCl_3$ )  $\delta$  (ppm) 190.6, 184.4, 166.2, 165.9, 164.5,

164.2, 138.6, 135.2, 135.2, 134.8, 134.8, 134.1, 132.4, 132.3, 131.7, 131.6, 129.2, 128.4, 127.7, 127.6, 127.0, 126.3, 125.6, 119.9, 115.5, 115.3, 42.8, 29.1; HRMS (ESI):  $m/z$   $[M + H]^+$  calcd for  $C_{26}H_{18}F_2NO_2$ : 414.1300; found: 414.1308.

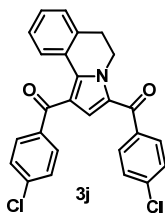

(5,6-dihydropyrrolo[2,1-*a*]isoquinoline-1,3-diyl)bis((4-chlorophenyl)methanone) (**3j**): Yellow solid; 183.7 mg (yield 79%); mp 147-149 °C; IR (KBr): 3440, 1629, 1587, 1480, 1445, 1398, 1263, 1215, 1193, 1089, 1013, 961, 883, 756, 565, 478  $cm^{-1}$ ;  $^1H$  NMR (600 MHz,  $CDCl_3$ )  $\delta$  (ppm) 7.83 (d,  $J = 7.8$  Hz, 2H), 7.77 (t,  $J = 7.8$  Hz, 3H), 7.43 (d,  $J = 8.4$  Hz, 2H), 7.39 (d,  $J = 7.8$  Hz, 2H), 7.29 (s, 2H), 7.20-7.16 (m, 1H), 6.88 (s, 1H), 4.69 (t,  $J = 6.6$  Hz, 2H), 3.14 (t,  $J = 6.0$  Hz, 2H);  $^{13}C$  NMR (150 MHz,  $CDCl_3$ )  $\delta$  (ppm) 190.8, 184.6, 139.0, 138.9, 138.4, 137.2, 136.9, 134.1, 131.2, 130.6, 129.4, 128.6, 128.6, 128.3, 127.7, 127.0, 126.2, 125.8, 119.8, 42.8, 29.1; HRMS (ESI):  $m/z$   $[M + H]^+$  calcd for  $C_{26}H_{18}Cl_2NO_2$ : 446.0709; found: 446.0702.

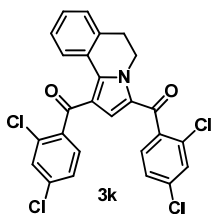

(5,6-dihydropyrrolo[2,1-*a*]isoquinoline-1,3-diyl)bis((2,4-dichlorophenyl)methanone) (**3k**): Brown solid; 158.9 mg (yield 62%); mp 201-203 °C; IR (KBr): 3439, 1727, 1698, 1658, 1649, 1641, 1631, 1612, 1581, 1461, 1452, 1384, 1356, 670, 595  $cm^{-1}$ ;  $^1H$  NMR (600 MHz,  $CDCl_3$ )  $\delta$  (ppm) 8.19 (d,  $J = 7.8$  Hz, 1H), 7.44 (s, 1H), 7.41 (s, 1H), 7.37 (t,  $J = 8.4$  Hz, 2H), 7.34 (d,  $J = 7.8$  Hz, 1H), 7.31-7.28 (m, 3H), 7.27-7.25 (m, 1H), 6.53 (s, 1H), 4.78 (t,  $J = 6.6$  Hz, 2H), 3.13 (t,  $J = 6.0$  Hz, 2H);  $^{13}C$  NMR (150 MHz,  $CDCl_3$ )  $\delta$  (ppm) 188.8, 183.4, 140.8, 137.8, 137.0, 136.8, 136.6, 134.6, 134.6, 132.7, 132.5, 130.6, 130.2, 130.2, 130.1, 128.5, 127.8, 127.5, 127.1, 127.0, 126.9, 126.0, 121.0, 42.9, 29.1; HRMS (ESI):  $m/z$   $[M + H]^+$  calcd for  $C_{26}H_{16}Cl_4NO_2$ : 513.9930; found: 513.9902.

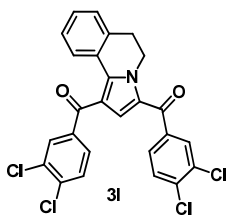

(5,6-dihydropyrrolo[2,1-*a*]isoquinoline-1,3-diyl)bis((3,4-dichlorophenyl)methanone) (**3l**): Yellow solid; 189.8 mg (yield 74%); mp 213-215 °C; IR (KBr): 3449, 1635, 1528, 1447, 1400, 1267, 1027, 967, 910, 778, 763, 670  $cm^{-1}$ ;  $^1H$  NMR (600 MHz,  $CDCl_3$ )  $\delta$  (ppm) 7.99 (s, 1H), 7.92 (s,

1H), 7.82 (d,  $J = 7.8$  Hz, 1H), 7.70 (d,  $J = 8.4$  Hz, 1H), 7.65 (d,  $J = 8.4$  Hz, 1H), 7.52 (q,  $J = 7.8$  Hz, 2H), 7.34-7.30 (m, 2H), 7.22 (t,  $J = 7.2$  Hz, 1H), 6.89 (s, 1H), 4.69 (t,  $J = 6.6$  Hz, 2H), 3.15 (t,  $J = 6.0$  Hz, 2H);  $^{13}\text{C}$  NMR (150 MHz,  $\text{CDCl}_3$ )  $\delta$  (ppm) 189.3, 183.2, 139.5, 138.5, 138.3, 137.2, 136.6, 134.2, 133.0, 132.9, 131.6, 131.1, 130.5, 130.4, 129.7, 128.8, 128.2, 128.0, 127.8, 127.8, 127.1, 126.0, 126.0, 119.4, 42.9, 29.1; HRMS (ESI):  $m/z$   $[\text{M} + \text{H}]^+$  calcd for  $\text{C}_{26}\text{H}_{16}\text{Cl}_4\text{NO}_2$ : 513.9930; found: 513.9944.

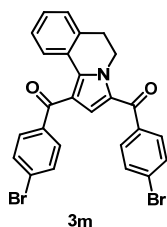

(5,6-dihydropyrrolo[2,1-*a*]isoquinoline-1,3-diyl)bis((4-bromophenyl)methanone) (**3m**): Yellow solid; 213.2 mg (yield 80%); mp 148-149 °C; IR (KBr): 3446, 2924, 1630, 1584, 1479, 1445, 1384, 1262, 1214, 1191, 1172, 1011, 882, 753, 563  $\text{cm}^{-1}$ ;  $^1\text{H}$  NMR (600 MHz,  $\text{CDCl}_3$ )  $\delta$  (ppm) 7.78 (d,  $J = 7.8$  Hz, 1H), 7.75 (d,  $J = 8.4$  Hz, 2H), 7.69 (d,  $J = 7.8$  Hz, 2H), 7.60 (d,  $J = 8.4$  Hz, 2H), 7.57 (d,  $J = 8.4$  Hz, 2H), 7.30-7.27 (m, 2H), 7.22-7.19 (m, 1H), 6.87 (s, 1H), 4.69 (t,  $J = 6.0$  Hz, 2H), 3.14 (t,  $J = 6.0$  Hz, 2H);  $^{13}\text{C}$  NMR (150 MHz,  $\text{CDCl}_3$ )  $\delta$  (ppm) 190.9, 184.8, 139.0, 137.7, 137.4, 134.2, 131.6, 131.6, 131.3, 130.7, 129.5, 128.3, 127.8, 127.7, 127.1, 127.1, 126.3, 125.9, 119.8, 42.9, 29.2; HRMS (ESI):  $m/z$   $[\text{M} + \text{H}]^+$  calcd for  $\text{C}_{26}\text{H}_{18}\text{Br}_2\text{NO}_2$ : 533.9699; found: 533.9704.

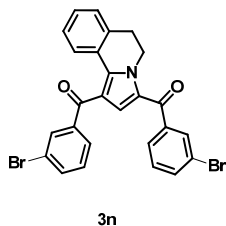

(5,6-dihydropyrrolo[2,1-*a*]isoquinoline-1,3-diyl)bis((3-bromophenyl)methanone) (**3n**): Yellow solid; 221.2 mg (yield 83%); mp 139-140 °C; IR (KBr): 3441, 1650, 1619, 1555, 1529, 1444, 1249, 1211, 1186, 1143, 967, 890, 772, 746, 710  $\text{cm}^{-1}$ ;  $^1\text{H}$  NMR (600 MHz,  $\text{CDCl}_3$ )  $\delta$  (ppm) 8.05 (s, 1H), 7.96 (s, 1H), 7.86 (d,  $J = 7.8$  Hz, 1H), 7.79 (d,  $J = 7.8$  Hz, 1H), 7.74 (d,  $J = 7.2$  Hz, 1H), 7.66 (d,  $J = 7.2$  Hz, 2H), 7.36-7.28 (m, 4H), 7.21 (t,  $J = 7.2$  Hz, 1H), 6.91 (s, 1H), 4.70 (t,  $J = 6.0$  Hz, 2H), 3.14 (t,  $J = 6.6$  Hz, 2H);  $^{13}\text{C}$  NMR (150 MHz,  $\text{CDCl}_3$ )  $\delta$  (ppm) 190.3, 184.3, 140.8, 140.5, 139.3, 135.4, 134.9, 134.2, 132.7, 132.1, 129.9, 129.9, 129.6, 128.4, 128.1, 127.8, 127.7, 127.7, 127.1, 126.4, 126.2, 122.6, 122.5, 119.7, 42.8, 29.1; HRMS (ESI):  $m/z$   $[\text{M} + \text{H}]^+$  calcd for  $\text{C}_{26}\text{H}_{18}\text{Br}_2\text{NO}_2$ : 533.9699; found: 533.9688.

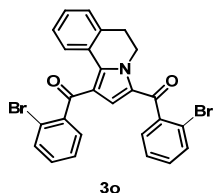

(5,6-dihydropyrrolo[2,1-*a*]isoquinoline-1,3-diyl)bis((2-bromophenyl)methanone) (**3o**): Brown solid; 186.5 mg (yield 70%); mp 136-137 °C; IR (KBr): 3450, 2926, 1642, 1586, 1429, 1384, 1221, 1027, 960, 886, 743, 638 cm<sup>-1</sup>; <sup>1</sup>H NMR (600 MHz, CDCl<sub>3</sub>) δ (ppm) 8.27 (d, *J* = 7.8 Hz, 1H), 7.55 (q, *J* = 7.8 Hz, 2H), 7.38 (t, *J* = 7.8 Hz, 2H), 7.33 (t, *J* = 6.6 Hz, 2H), 7.31-7.27 (m, 4H), 7.23 (t, *J* = 7.2 Hz, 1H), 6.50 (s, 1H), 4.80 (t, *J* = 6.6 Hz, 2H), 3.13 (t, *J* = 6.6 Hz, 2H); <sup>13</sup>C NMR (150 MHz, CDCl<sub>3</sub>) δ (ppm) 190.6, 185.4, 141.4, 140.6, 140.5, 134.6, 134.5, 133.3, 133.3, 131.2, 131.1, 129.9, 129.5, 129.0, 128.6, 128.5, 128.3, 127.4, 127.0, 126.9, 126.2, 120.9, 119.9, 119.9, 42.8, 29.1; HRMS (ESI): *m/z* [M + H]<sup>+</sup> calcd for C<sub>26</sub>H<sub>18</sub>Br<sub>2</sub>NO<sub>2</sub>: 533.9699; found: 533.9679.

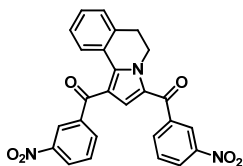

**3p**

(5,6-dihydropyrrolo[2,1-*a*]isoquinoline-1,3-diyl)bis((3-nitrophenyl)methanone) (**3p**): Orange solid; 179.8 mg (yield 77%); mp 142-144 °C; IR (KBr): 3444, 1633, 1529, 1478, 1446, 1349, 1256, 1213, 1192, 762, 720 cm<sup>-1</sup>; <sup>1</sup>H NMR (600 MHz, CDCl<sub>3</sub>) δ (ppm) 8.70 (s, 1H), 8.66 (s, 1H), 8.38 (t, *J* = 7.2 Hz, 2H), 8.25 (d, *J* = 7.2 Hz, 1H), 8.18 (d, *J* = 7.2 Hz, 1H), 7.86 (d, *J* = 7.8 Hz, 1H), 7.68 (q, *J* = 7.8 Hz, 2H), 7.37-7.32 (m, 2H), 7.24-7.21 (m, 1H), 6.93 (s, 1H), 4.76 (t, *J* = 6.6 Hz, 2H), 3.20 (t, *J* = 6.6 Hz, 2H); <sup>13</sup>C NMR (150 MHz, CDCl<sub>3</sub>) δ (ppm) 189.0, 183.1, 148.0, 147.9, 140.2, 140.0, 135.3, 134.8, 134.4, 130.0, 129.7, 128.0, 127.9, 127.1, 126.9, 126.5, 125.8, 124.6, 124.0, 119.3, 43.0, 29.0; HRMS (ESI): *m/z* [M + H]<sup>+</sup> calcd for C<sub>26</sub>H<sub>18</sub>N<sub>3</sub>O<sub>6</sub>: 468.1190; found: 468.1182.

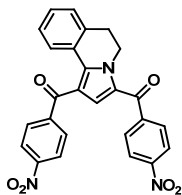

**3q**

(5,6-dihydropyrrolo[2,1-*a*]isoquinoline-1,3-diyl)bis((4-nitrophenyl)methanone) (**3q**): Orange solid; 184.5 mg (yield 79%); mp 218-221 °C; IR (KBr): 3444, 2923, 1634, 1524, 1445, 1384, 1348, 1216, 1191, 1129, 1041, 846, 771, 563 cm<sup>-1</sup>; <sup>1</sup>H NMR (600 MHz, CDCl<sub>3</sub>) δ (ppm) 8.29 (d, *J* = 8.4 Hz, 2H), 8.24 (d, *J* = 8.4 Hz, 2H), 7.99 (d, *J* = 8.4 Hz, 2H), 7.95 (d, *J* = 9.0 Hz, 2H), 7.79 (d, *J* = 7.8 Hz, 1H), 7.37-7.32 (m, 2H), 7.23-7.20 (m, 1H), 6.90 (s, 1H), 4.76 (t, *J* = 6.6 Hz, 2H), 3.19 (t, *J* = 6.6 Hz, 2H); <sup>13</sup>C NMR (150 MHz, CDCl<sub>3</sub>) δ (ppm) 189.6, 183.7, 149.8, 149.5, 144.0, 143.6, 140.2, 134.4, 130.4, 130.0, 129.9, 128.2, 128.0, 127.8, 127.0, 126.5, 125.7, 123.5, 119.6, 43.0, 29.0; HRMS (ESI): *m/z* [M + H]<sup>+</sup> calcd for C<sub>26</sub>H<sub>18</sub>N<sub>3</sub>O<sub>6</sub>: 468.1190; found: 468.1207.

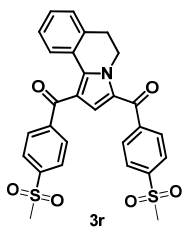

**3r**

(5,6-dihydropyrrolo[2,1-*a*]isoquinoline-1,3-diyl)bis((4-(methylsulfonyl)phenyl)methanone) (**3r**): Yellow solid; 183.9 mg (yield 69%); mp 160-161 °C; IR (KBr): 3440, 1636, 1523, 1445, 1397, 1301, 1153, 958, 888, 855, 779, 752, 707 cm<sup>-1</sup>; <sup>1</sup>H NMR (600 MHz, CDCl<sub>3</sub>) δ (ppm) 8.06-7.99 (m, 6H), 7.97 (d, *J* = 7.8 Hz, 2H), 7.77 (d, *J* = 7.8 Hz, 1H), 7.35-7.30 (m, 2H), 7.21-7.17 (m, 1H), 6.87 (s, 1H), 4.74 (t, *J* = 6.6 Hz, 2H), 3.18 (t, *J* = 6.6 Hz, 2H), 3.11 (s, 3H), 3.08 (s, 3H); <sup>13</sup>C NMR (150 MHz, CDCl<sub>3</sub>) δ (ppm) 190.1, 184.0, 143.5, 143.4, 143.1, 143.0, 140.0, 134.3, 130.4, 129.9, 129.8, 128.2, 127.8, 127.8, 127.4, 127.0, 126.3, 125.8, 119.6, 44.2, 42.9, 29.0; HRMS (ESI): *m/z* [M + H]<sup>+</sup> calcd for C<sub>28</sub>H<sub>23</sub>NO<sub>6</sub>S<sub>2</sub>: 534.1040; found: 534.1056.

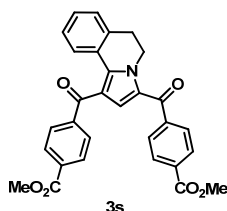

dimethyl 4,4'-(5,6-dihydropyrrolo[2,1-*a*]isoquinoline-1,3-dicarbonyl)dibenzoate (**3s**): Yellow solid; 192.3 mg (yield 78%); mp 166-167 °C; IR (KBr): 3431, 2951, 1720, 1658, 1625, 1485, 1442, 1400, 1279, 1210, 1195, 1103, 1016, 960, 887, 778, 732 cm<sup>-1</sup>; <sup>1</sup>H NMR (600 MHz, CDCl<sub>3</sub>) δ (ppm) 8.11 (d, *J* = 8.4 Hz, 2H), 8.08 (d, *J* = 8.4 Hz, 2H), 7.91 (d, *J* = 8.4 Hz, 2H), 7.86 (t, *J* = 8.4 Hz, 3H), 7.32-7.27 (m, 2H), 7.20 (t, *J* = 7.8 Hz, 1H), 6.90 (s, 1H), 4.74 (t, *J* = 6.6 Hz, 2H), 3.93 (s, 3H), 3.93 (s, 3H), 3.16 (t, *J* = 6.6 Hz, 2H); <sup>13</sup>C NMR (150 MHz, CDCl<sub>3</sub>) δ (ppm) 191.0, 185.1, 166.1, 142.6, 142.2, 139.5, 134.2, 133.3, 132.8, 129.5, 129.4, 128.9, 128.3, 127.9, 127.6, 127.0, 126.7, 126.1, 119.9, 52.3, 42.8, 29.1; HRMS (ESI): *m/z* [M + H]<sup>+</sup> calcd for C<sub>30</sub>H<sub>24</sub>NO<sub>6</sub>: 494.1598; found: 494.1622.

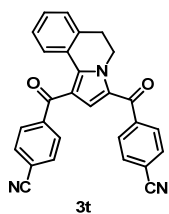

4,4'-(5,6-dihydropyrrolo[2,1-*a*]isoquinoline-1,3-dicarbonyl)dibenzonitrile (**3t**): Yellow solid; 172.9 mg (yield 81%); mp 220-221 °C; IR (KBr): 2228, 1659, 1633, 1524, 1486, 1429, 1392, 1261, 1208, 1172, 961, 887, 859, 760 cm<sup>-1</sup>; <sup>1</sup>H NMR (600 MHz, CDCl<sub>3</sub>) δ (ppm) 7.93 (d, *J* = 8.4 Hz, 2H), 7.89 (d, *J* = 8.4 Hz, 2H), 7.77 (d, *J* = 7.8 Hz, 2H), 7.22 (d, *J* = 7.8 Hz, 3H), 7.34-7.30 (m, 2H), 7.21-7.17 (m, 1H), 6.87 (s, 1H), 4.73 (t, *J* = 6.6 Hz, 2H), 3.17 (t, *J* = 6.6 Hz, 2H); <sup>13</sup>C NMR (150 MHz, CDCl<sub>3</sub>) δ (ppm) 189.9, 183.9, 142.3, 141.9, 139.9, 134.3, 132.1, 129.9, 129.8, 129.4, 128.1, 127.9, 127.8, 127.0, 126.2, 125.7, 119.5, 117.8, 115.7, 115.3, 42.9, 29.0; HRMS (ESI): *m/z* [M + H]<sup>+</sup> calcd for C<sub>28</sub>H<sub>18</sub>N<sub>3</sub>O<sub>2</sub>: 428.1394; found: 428.1415.

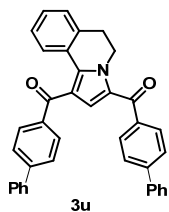



(5,6-dihydropyrrolo[2,1-*a*]isoquinoline-1,3-diyl)bis([1,1'-biphenyl]-4-ylmethanone) (**3u**): Yellow solid; 211.7 mg (yield 80%); mp 123-124 °C; IR (KBr): 3443, 2852, 1629, 1480, 1445, 1384, 1264, 1217, 1186, 1128, 1040, 1013, 961, 886, 854, 748, 695, 563 cm<sup>-1</sup>; <sup>1</sup>H NMR (600 MHz, CDCl<sub>3</sub>) δ (ppm) 8.00 (d, *J* = 7.8 Hz, 2H), 7.93 (d, *J* = 7.8 Hz, 2H), 7.86 (d, *J* = 7.8 Hz, 1H), 7.66 (t, *J* = 8.4 Hz, 4H), 7.61 (d, *J* = 7.2 Hz, 4H), 7.44 (t, *J* = 7.2 Hz, 4H), 7.37 (t, *J* = 7.2 Hz, 2H), 7.29-7.27 (m, 2H), 7.24-7.19 (m, 1H), 7.06 (s, 1H), 4.73 (t, *J* = 6.6 Hz, 2H), 3.16 (t, *J* = 6.6 Hz, 2H); <sup>13</sup>C NMR (150 MHz, CDCl<sub>3</sub>) δ (ppm) 191.8, 185.6, 145.3, 144.8, 139.8, 139.8, 138.6, 137.7, 137.3, 134.2, 130.5, 129.9, 129.1, 128.9, 128.6, 128.1, 128.0, 127.7, 127.7, 127.2, 127.2, 127.0, 127.0, 126.6, 125.9, 120.2, 42.8, 29.2; HRMS (ESI): *m/z* [M + H]<sup>+</sup> calcd for C<sub>38</sub>H<sub>28</sub>NO<sub>2</sub>: 530.2115; found: 530.2118.

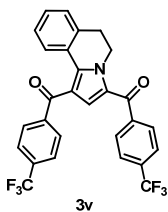

(5,6-dihydropyrrolo[2,1-*a*]isoquinoline-1,3-diyl)bis((4-(trifluoromethyl)phenyl)methanone) (**3v**): Yellow solid; 205.2 mg (yield 80%); mp 120-121 °C; IR (KBr): 3442, 1656, 1636, 1524, 1448, 1406, 1330, 1170, 1125, 1066, 887, 852, 766 cm<sup>-1</sup>; <sup>1</sup>H NMR (600 MHz, CDCl<sub>3</sub>) δ (ppm) 7.98 (d, *J* = 7.8 Hz, 2H), 7.91 (d, *J* = 7.8 Hz, 2H), 7.79 (d, *J* = 7.8 Hz, 1H), 7.72 (d, *J* = 7.8 Hz, 2H), 7.69 (d, *J* = 7.8 Hz, 2H), 7.34-7.29 (m, 2H), 7.20 (t, *J* = 5.4 Hz, 1H), 6.90 (s, 1H), 4.74 (t, *J* = 6.0 Hz, 2H), 3.17 (t, *J* = 6.6 Hz, 2H); <sup>13</sup>C NMR (150 MHz, CDCl<sub>3</sub>) δ (ppm) 190.7, 184.7, 142.0, 141.6, 139.7, 134.3, 134.1, 133.8, 133.6, 133.4, 130.0, 129.7, 129.4, 128.4, 127.9, 127.8, 127.1, 126.2, 126.1, 125.4, 124.5, 122.7, 119.8, 43.0, 29.2; HRMS (ESI): *m/z* [M + H]<sup>+</sup> calcd for C<sub>28</sub>H<sub>18</sub>F<sub>6</sub>NO<sub>2</sub>: 514.1236; found: 514.1259.

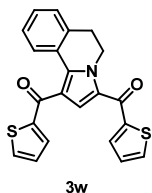

(5,6-dihydropyrrolo[2,1-*a*]isoquinoline-1,3-diyl)bis(thiophen-2-ylmethanone) (**3w**): Yellow solid; 161.4 mg (yield 83%); mp 211-212 °C; IR (KBr): 3445, 2952, 2922, 1629, 1446, 1413, 1383, 1265, 1215, 1190, 1130, 1047, 757, 562 cm<sup>-1</sup>; <sup>1</sup>H NMR (600 MHz, CDCl<sub>3</sub>) δ (ppm) 7.90 (d, *J* = 7.2 Hz, 1H), 7.79 (s, 1H), 7.70 (s, 1H), 7.67-7.63 (m, 2H), 7.40 (s, 1H), 7.28-7.24 (m, 2H), 7.21 (t, *J* = 6.6 Hz, 1H), 7.14-7.11 (m, 2H), 4.63 (t, *J* = 6.0 Hz, 2H), 3.41 (t, *J* = 6.0 Hz, 2H); <sup>13</sup>C NMR (150 MHz, CDCl<sub>3</sub>) δ (ppm) 183.8, 177.0, 145.3, 144.3, 137.9, 134.1, 134.0, 133.8, 132.9, 132.7, 129.1, 128.4, 127.9, 127.8, 127.6, 127.6, 127.1, 126.7, 123.6, 120.2, 42.8, 29.2; HRMS (ESI): *m/z* [M + H]<sup>+</sup> calcd for C<sub>22</sub>H<sub>16</sub>NO<sub>2</sub>S<sub>2</sub>: 390.0617; found: 390.0617.

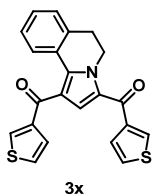

3x

(5,6-dihydropyrrolo[2,1-*a*]isoquinoline-1,3-diyl)bis(thiophen-3-ylmethanone) (**3x**): Brown solid; 160.9 mg (yield 83%); mp 173-174 °C; IR (KBr): 3441, 3104, 1614, 1511, 1450, 1415, 1259, 1227, 1164, 975, 857, 747, 726  $\text{cm}^{-1}$ ;  $^1\text{H}$  NMR (600 MHz,  $\text{CDCl}_3$ )  $\delta$  (ppm) 7.97 (d,  $J = 10.2$  Hz, 2H), 7.82 (d,  $J = 7.8$  Hz, 1H), 7.61 (d,  $J = 5.4$  Hz, 1H), 7.58 (d,  $J = 4.8$  Hz, 1H), 7.38-7.36 (m, 1H), 7.35-7.32 (m, 1H), 7.28-7.25 (m, 2H), 7.22-7.18 (m, 2H), 4.66 (t,  $J = 6.0$  Hz, 2H), 3.12 (t,  $J = 6.0$  Hz, 2H);  $^{13}\text{C}$  NMR (150 MHz,  $\text{CDCl}_3$ )  $\delta$  (ppm) 185.6, 179.3, 143.0, 142.2, 137.9, 134.1, 133.7, 131.9, 129.1, 129.1, 128.2, 128.1, 127.6, 127.6, 127.0, 126.6, 126.2, 124.2, 121.0, 42.8, 29.2; HRMS (ESI):  $m/z$   $[\text{M} + \text{H}]^+$  calcd for  $\text{C}_{22}\text{H}_{16}\text{NO}_2\text{S}_2$ : 390.0617; found: 390.0626.

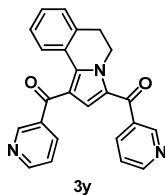

3y

(5,6-dihydropyrrolo[2,1-*a*]isoquinoline-1,3-diyl)bis(pyridin-3-ylmethanone) (**3y**): Brown solid; 136.5 mg (yield 72%); mp 108-110 °C; IR (KBr): 3442, 1621, 1582, 1525, 1444, 1266, 1214, 1193, 959, 884, 735, 701  $\text{cm}^{-1}$ ;  $^1\text{H}$  NMR (600 MHz,  $\text{CDCl}_3$ )  $\delta$  (ppm) 9.02 (d,  $J = 4.8$  Hz, 2H), 8.76 (d,  $J = 3.6$  Hz, 1H), 8.74 (d,  $J = 3.6$  Hz, 1H), 8.19 (d,  $J = 7.8$  Hz, 1H), 8.11 (d,  $J = 7.8$  Hz, 1H), 7.83 (d,  $J = 7.8$  Hz, 1H), 7.45-7.39 (m, 2H), 7.35-7.30 (m, 2H), 7.21 (t,  $J = 6.6$  Hz, 1H), 6.97 (s, 1H), 4.74 (t,  $J = 6.6$  Hz, 2H), 3.17 (t,  $J = 6.6$  Hz, 2H);  $^{13}\text{C}$  NMR (150 MHz,  $\text{CDCl}_3$ )  $\delta$  (ppm) 189.8, 183.7, 152.9, 152.5, 150.7, 150.7, 149.8, 149.7, 139.7, 136.9, 136.4, 134.6, 134.3, 134.1, 129.7, 128.3, 127.9, 127.7, 127.0, 126.5, 125.9, 123.4, 123.4, 119.7, 42.9, 29.0; HRMS (ESI):  $m/z$   $[\text{M} + \text{H}]^+$  calcd for  $\text{C}_{24}\text{H}_{18}\text{N}_3\text{O}_2$ : 380.1394; found: 380.1410.

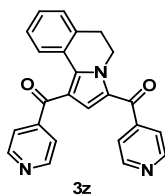

3z

(5,6-dihydropyrrolo[2,1-*a*]isoquinoline-1,3-diyl)bis(pyridin-4-ylmethanone) (**3z**): Yellow solid; 145.9 mg (yield 77%); mp 188-189 °C; IR (KBr): 1622, 1525, 1445, 1406, 1324, 1266, 1195, 966, 889, 650  $\text{cm}^{-1}$ ;  $^1\text{H}$  NMR (600 MHz,  $\text{CDCl}_3$ )  $\delta$  (ppm) 8.77 (d,  $J = 5.4$  Hz, 2H), 8.75 (d,  $J = 5.4$  Hz, 2H), 7.86 (d,  $J = 7.8$  Hz, 1H), 7.63 (d,  $J = 5.4$  Hz, 2H), 7.60 (d,  $J = 5.4$  Hz, 2H), 7.37-7.30 (m, 2H), 7.23 (t,  $J = 7.2$  Hz, 1H), 6.92 (s, 1H), 4.76 (t,  $J = 6.6$  Hz, 2H), 3.17 (t,  $J = 6.6$  Hz, 2H);  $^{13}\text{C}$  NMR (150 MHz,  $\text{CDCl}_3$ )  $\delta$  (ppm) 190.2, 184.2, 150.5, 150.4, 145.5, 145.1, 140.4, 134.4, 130.1, 128.2, 128.0, 127.8, 127.1, 126.9, 125.8, 122.6, 122.3, 119.5, 43.0, 29.1; HRMS (ESI):  $m/z$   $[\text{M} + \text{H}]^+$  calcd for  $\text{C}_{24}\text{H}_{18}\text{N}_3\text{O}_2$ : 380.1394; found: 380.1408.

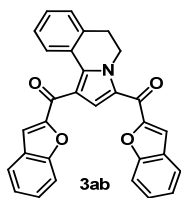

(5,6-dihydropyrrolo[2,1-*a*]isoquinoline-1,3-diyl)bis(benzofuran-3-ylmethanone) (**3ab**): Yellow solid; 194.2 mg (yield 85%); mp 171-173 °C; IR (KBr): 3441, 1650, 1616, 1552, 1443, 1398, 1273, 1159, 1141, 853, 836, 757, 744  $\text{cm}^{-1}$ ;  $^1\text{H}$  NMR (600 MHz,  $\text{CDCl}_3$ )  $\delta$  (ppm) 8.04 (s, 1H), 7.99 (d,  $J = 8.4$  Hz, 1H), 7.72 (d,  $J = 7.8$  Hz, 2H), 7.62 (t,  $J = 7.2$  Hz, 2H), 7.58 (d,  $J = 4.8$  Hz, 2H), 7.50-7.44 (m, 2H), 7.34-7.27 (m, 4H), 7.24 (t,  $J = 7.2$  Hz, 1H), 4.74 (t,  $J = 6.6$  Hz, 2H), 3.14 (t,  $J = 6.6$  Hz, 2H);  $^{13}\text{C}$  NMR (150 MHz,  $\text{CDCl}_3$ )  $\delta$  (ppm) 180.0, 173.0, 155.9, 155.6, 153.3, 153.2, 139.4, 134.3, 129.5, 128.2, 128.0, 127.9, 127.8, 127.6, 127.1, 127.1, 127.0, 126.4, 125.0, 123.9, 123.3, 123.0, 119.8, 115.7, 114.2, 112.4, 112.3, 43.0, 29.1; HRMS (ESI):  $m/z$   $[\text{M} + \text{H}]^+$  calcd for  $\text{C}_{30}\text{H}_{19}\text{NO}_4$ : 458.1387; found: 458.1399.

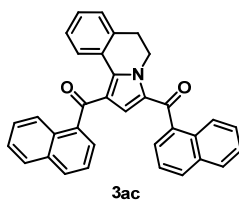

(5,6-dihydropyrrolo[2,1-*a*]isoquinoline-1,3-diyl)bis(naphthalen-1-ylmethanone) (**3ac**): Yellow solid; 174.1 mg (yield 73%); mp 122-123 °C; IR (KBr): 3446, 2924, 2852, 1626, 1445, 1384, 1273, 1215, 1183, 1128, 1040, 760, 568, 477  $\text{cm}^{-1}$ ;  $^1\text{H}$  NMR (600 MHz,  $\text{CDCl}_3$ )  $\delta$  (ppm) 8.42 (s, 1H), 8.37 (s, 1H), 8.04 (d,  $J = 8.4$  Hz, 1H), 7.94 (d,  $J = 8.4$  Hz, 2H), 7.89-8.84 (m, 4H), 7.81 (d,  $J = 7.8$  Hz, 2H), 7.52 (q,  $J = 7.2$  Hz, 2H), 7.48 (q,  $J = 7.8$  Hz, 2H), 7.30-7.25 (m, 2H), 7.20-7.17 (m, 1H), 7.06 (s, 1H), 4.77 (t,  $J = 6.6$  Hz, 2H), 3.17 (t,  $J = 6.6$  Hz, 2H);  $^{13}\text{C}$  NMR (150 MHz,  $\text{CDCl}_3$ )  $\delta$  (ppm) 192.3, 186.0, 138.6, 136.2, 135.9, 135.3, 135.0, 134.1, 132.2, 132.1, 131.8, 130.6, 129.3, 129.2, 129.1, 128.7, 128.2, 128.0, 127.7, 127.6, 127.6, 127.0, 126.6, 126.6, 126.3, 125.4, 125.3, 120.3, 42.9, 29.2; HRMS (ESI):  $m/z$   $[\text{M} + \text{H}]^+$  calcd for  $\text{C}_{34}\text{H}_{24}\text{NO}_2$ : 478.1802; found: 478.1805.

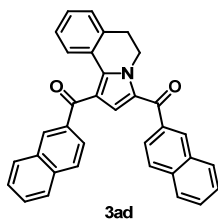

(5,6-dihydropyrrolo[2,1-*a*]isoquinoline-1,3-diyl)bis(naphthalen-2-ylmethanone) (**3ad**): Yellow solid; 164.6 mg (yield 69%); mp 118-119 °C; IR (KBr): 3443, 2924, 1630, 1480, 1384, 1274, 1219, 1183, 1127, 1042, 1015, 892, 773, 693, 569  $\text{cm}^{-1}$ ;  $^1\text{H}$  NMR (600 MHz,  $\text{CDCl}_3$ )  $\delta$  (ppm) 8.43 (d,  $J = 7.8$  Hz, 1H), 8.21 (d,  $J = 8.4$  Hz, 1H), 8.14 (d,  $J = 7.8$  Hz, 1H), 7.88 (d,  $J = 8.4$  Hz, 2H), 7.83 (d,  $J = 7.8$  Hz, 2H), 7.69 (d,  $J = 7.2$  Hz, 1H), 7.61 (d,  $J = 7.2$  Hz, 1H), 7.54-7.50 (m, 4H), 7.36 (t,  $J = 7.2$  Hz, 1H), 7.33 (d,  $J = 4.8$  Hz, 2H), 7.23-7.18 (m, 1H), 6.60 (s, 1H), 4.90 (t,  $J = 6.6$  Hz, 2H), 3.21 (t,  $J = 6.0$  Hz, 2H);  $^{13}\text{C}$  NMR (150 MHz,  $\text{CDCl}_3$ )  $\delta$  (ppm) 193.0, 187.4, 139.9, 136.8,

136.7, 134.5, 133.7, 133.6, 131.9, 131.1, 130.9, 130.7, 129.8, 129.6, 129.0, 128.3, 128.3, 128.2, 127.5, 127.4, 127.3, 127.0, 127.0, 126.5, 126.3, 126.3, 125.6, 125.6, 125.3, 124.1, 122.2, 42.9, 29.3; HRMS (ESI):  $m/z$   $[M + H]^+$  calcd for  $C_{34}H_{24}NO_2$ : 478.1802; found: 478.1800.

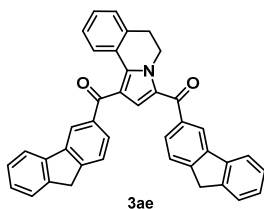

(5,6-dihydropyrrolo[2,1-*a*]isoquinoline-1,3-diyl)bis((9*H*-fluoren-3-yl)methanone) (**3ae**): Yellow solid; 143.8 mg (yield 52%); mp 253-254 °C; IR (KBr): 3441, 1637, 1623, 1605, 1446, 1433, 1423, 1387, 1264, 1150, 761, 749  $cm^{-1}$ ;  $^1H$  NMR (400 MHz,  $CDCl_3$ )  $\delta$  (ppm) 8.13 (s, 1H), 8.05 (s, 1H), 7.96 (d,  $J = 8.0$  Hz, 1H), 7.91 (d,  $J = 7.6$  Hz, 1H), 7.83-7.76 (m, 5H), 7.56 (d,  $J = 6.8$  Hz, 2H), 7.39 (t,  $J = 7.2$  Hz, 2H), 7.36-7.32 (m, 2H), 7.29 (t,  $J = 7.2$  Hz, 2H), 7.17 (t,  $J = 6.8$  Hz, 1H), 7.03 (s, 1H), 4.74 (t,  $J = 6.8$  Hz, 2H), 3.95 (s, 2H), 3.92 (s, 2H), 3.18 (t,  $J = 6.8$  Hz, 2H);  $^{13}C$  NMR (150 MHz,  $CDCl_3$ )  $\delta$  (ppm) 192.5, 186.1, 146.1, 145.6, 144.4, 144.2, 143.1, 143.0, 140.5, 138.2, 137.4, 137.0, 134.1, 129.5, 129.0, 128.9, 128.8, 127.9, 127.8, 127.7, 127.0, 127.0, 126.7, 126.6, 126.1, 125.8, 125.2, 125.1, 120.8, 120.7, 120.5, 119.4, 42.9, 36.9, 36.8, 29.3; HRMS (ESI):  $m/z$   $[M + H]^+$  calcd for  $C_{40}H_{27}NO_2$ : 554.2115; found: 554.2136.

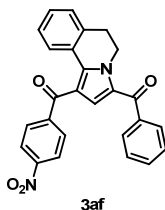

(3-benzoyl-5,6-dihydropyrrolo[2,1-*a*]isoquinolin-1-yl)(4-nitrophenyl)methanone (**3af**): 77.1 mg (yield 18%); mp 192-193 °C; IR (KBr): 1638, 1517, 1477, 1345, 1261, 1194, 1017, 959, 845, 735, 716  $cm^{-1}$ ;  $^1H$  NMR (400 MHz,  $CDCl_3$ )  $\delta$  (ppm) 8.26 (d,  $J = 8.8$  Hz, 2H), 8.00 (d,  $J = 8.8$  Hz, 2H), 7.85 (d,  $J = 8.0$  Hz, 1H), 7.82 (d,  $J = 6.8$  Hz, 2H), 7.57 (t,  $J = 7.6$  Hz, 1H), 7.46 (t,  $J = 8.0$  Hz, 2H), 7.33-7.31 (m, 2H), 7.23-7.19 (m, 1H), 6.89 (s, 1H), 4.72 (t,  $J = 6.8$  Hz, 2H), 3.16 (t,  $J = 6.8$  Hz, 2H);  $^{13}C$  NMR (150 MHz,  $CDCl_3$ )  $\delta$  (ppm) 189.9, 186.1, 149.8, 144.1, 139.4, 138.8, 134.4, 132.3, 130.5, 129.7, 129.2, 129.0, 128.4, 127.9, 127.8, 127.0, 126.2, 126.0, 123.5, 119.2, 43.0, 29.2; HRMS (ESI):  $m/z$   $[M + Na]^+$  calcd for  $C_{26}H_{18}N_2O_4Na$ : 445.1159; found: 445.1160.

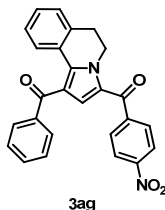

(1-benzoyl-5,6-dihydropyrrolo[2,1-*a*]isoquinolin-3-yl)(4-nitrophenyl)methanone (**3ag**): 80 mg (yield 19%); mp 165-166 °C; IR (KBr): 1598, 1504, 1447, 1319, 1215, 1023, 948, 879, 777, 736,

714  $\text{cm}^{-1}$ ;  $^1\text{H}$  NMR (600 MHz,  $\text{CDCl}_3$ )  $\delta$  (ppm) 8.29 (d,  $J = 8.4$  Hz, 2H), 7.95 (d,  $J = 9.0$  Hz, 2H), 7.87 (d,  $J = 7.8$  Hz, 2H), 7.78 (d,  $J = 7.8$  Hz, 1H), 7.55 (t,  $J = 7.2$  Hz, 1H), 7.43 (t,  $J = 7.8$ , 2H), 7.30 (d,  $J = 4.2$ , 2H), 7.20-7.17 (m, 1H), 6.90 (s, 1H), 4.76 (t,  $J = 6.6$  Hz, 2H), 3.17 (t,  $J = 6.6$  Hz, 2H);  $^{13}\text{C}$  NMR (150 MHz,  $\text{CDCl}_3$ )  $\delta$  (ppm) 191.9, 183.7, 149.5, 144.5, 139.7, 138.4, 134.2, 132.9, 129.9, 129.8, 129.6, 128.4, 127.9, 127.8, 127.7, 127.1, 126.9, 126.1, 123.5, 120.8, 42.9, 29.1; HRMS (ESI):  $m/z$   $[\text{M} + \text{H}]^+$  calcd for  $\text{C}_{26}\text{H}_{19}\text{N}_2\text{O}_4$ : 423.1339; found: 423.1357.

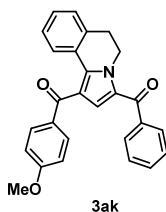

(3-benzoyl-5,6-dihydropyrrolo[2,1-*a*]isoquinolin-1-yl)(4-methoxyphenyl)methanone (**3ak**):  $^1\text{H}$  NMR (600 MHz,  $\text{CDCl}_3$ )  $\delta$  (ppm) 7.91 (d,  $J = 7.8$  Hz, 2H), 7.85 (t,  $J = 9.0$  Hz, 3H), 7.53 (d,  $J = 7.2$  Hz, 1H), 7.43 (t,  $J = 7.8$  Hz, 2H), 7.28-7.24 (m, 2H), 7.19-7.16 (m, 1H), 6.94 (s, 1H), 6.93-6.91 (m, 2H), 4.66 (t,  $J = 7.2$  Hz, 2H), 3.85 (s, 3H), 3.13 (t,  $J = 6.6$  Hz, 2H);  $^{13}\text{C}$  NMR (150 MHz,  $\text{CDCl}_3$ )  $\delta$  (ppm) 192.3, 184.9, 162.9, 138.8, 138.2, 134.1, 132.5, 131.6, 131.6, 129.9, 129.0, 128.8, 128.3, 127.7, 127.6, 126.9, 126.7, 125.3, 120.0, 113.5, 55.4, 42.8, 29.3; HRMS (ESI):  $m/z$   $[\text{M} + \text{Na}]^+$  calcd for  $\text{C}_{27}\text{H}_{21}\text{NO}_3\text{Na}$ : 430.1414; found: 430.1417.

## 7. Appendix: spectral copies of $^1\text{H}$ NMR, and $^{13}\text{C}$ NMR

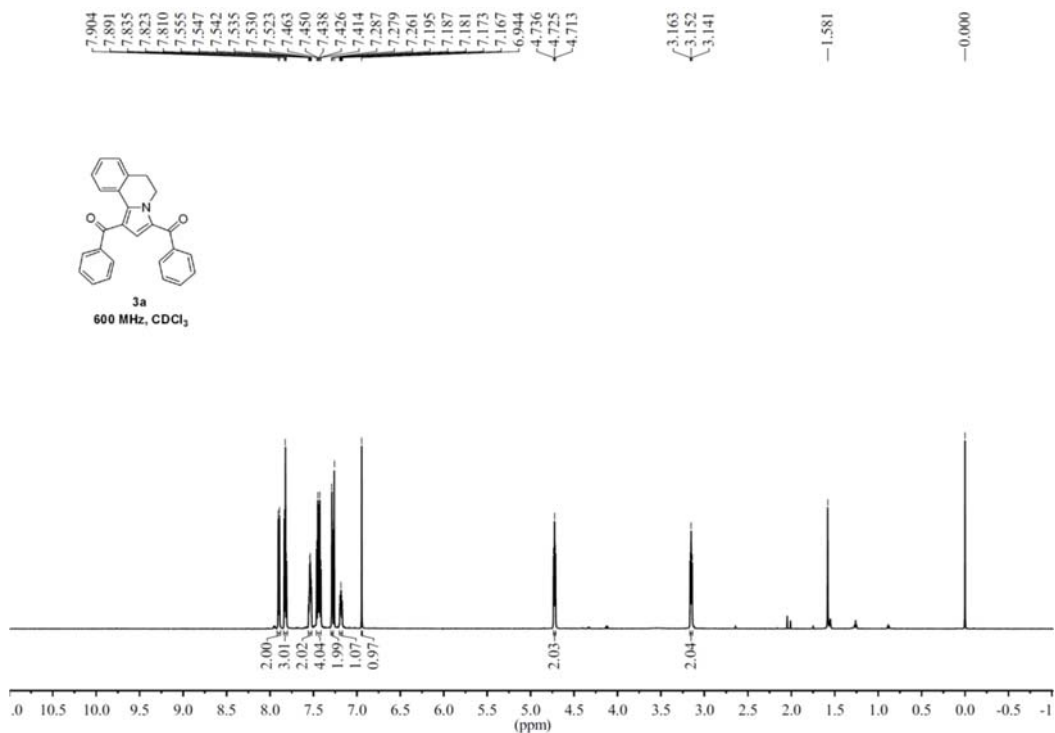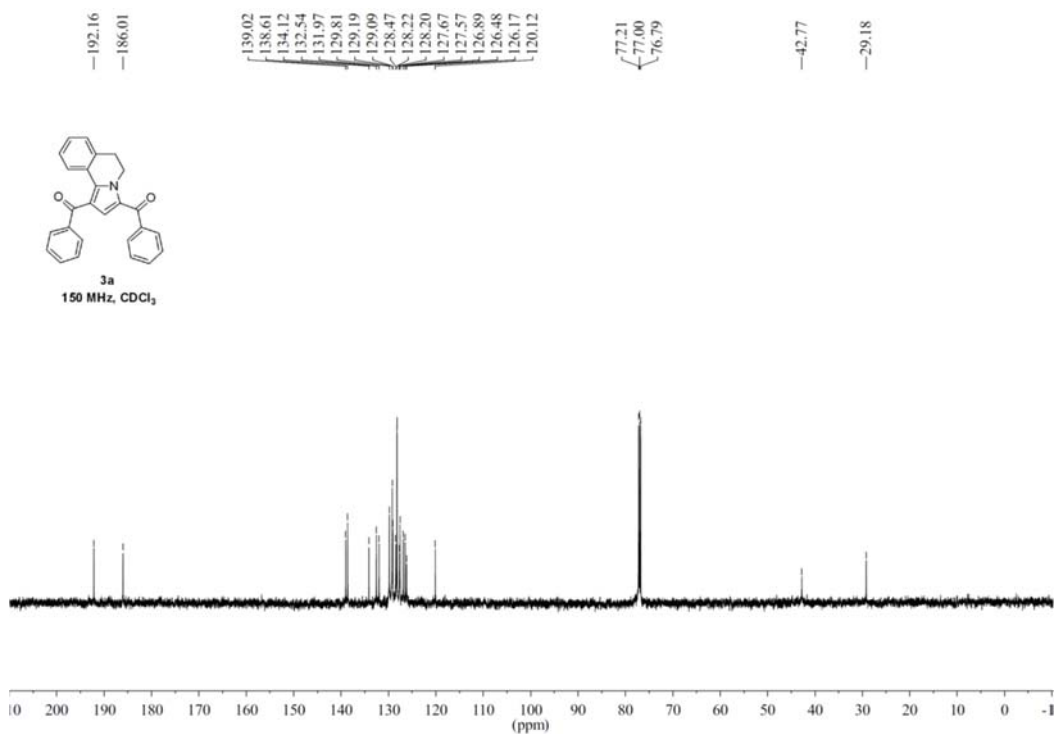

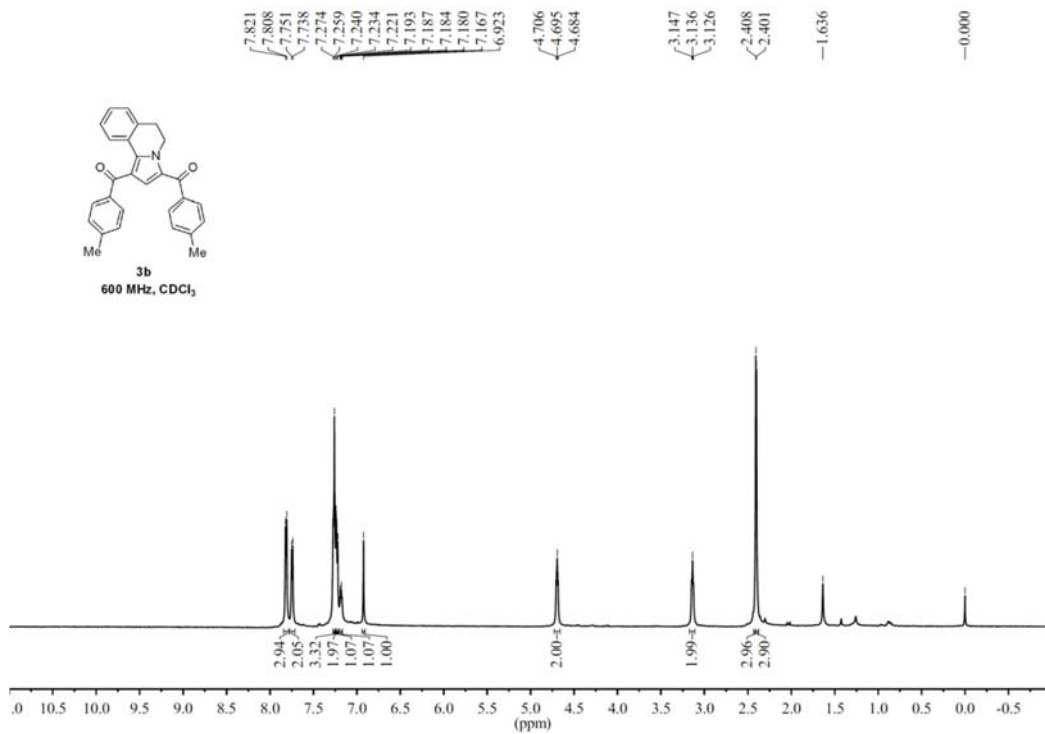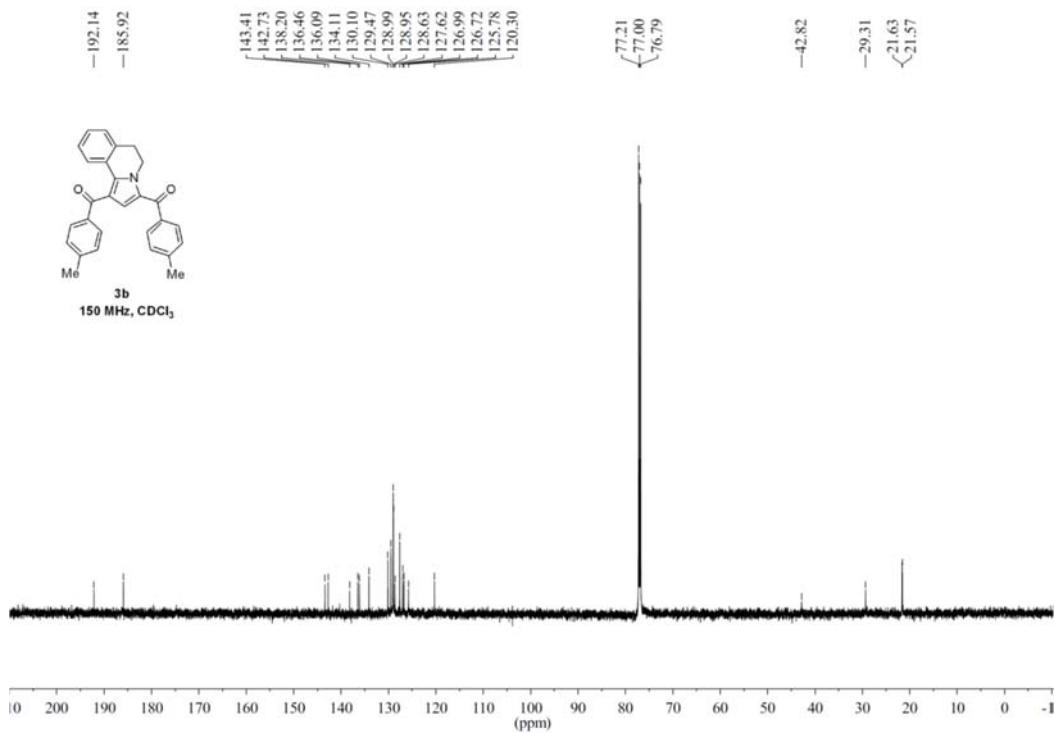

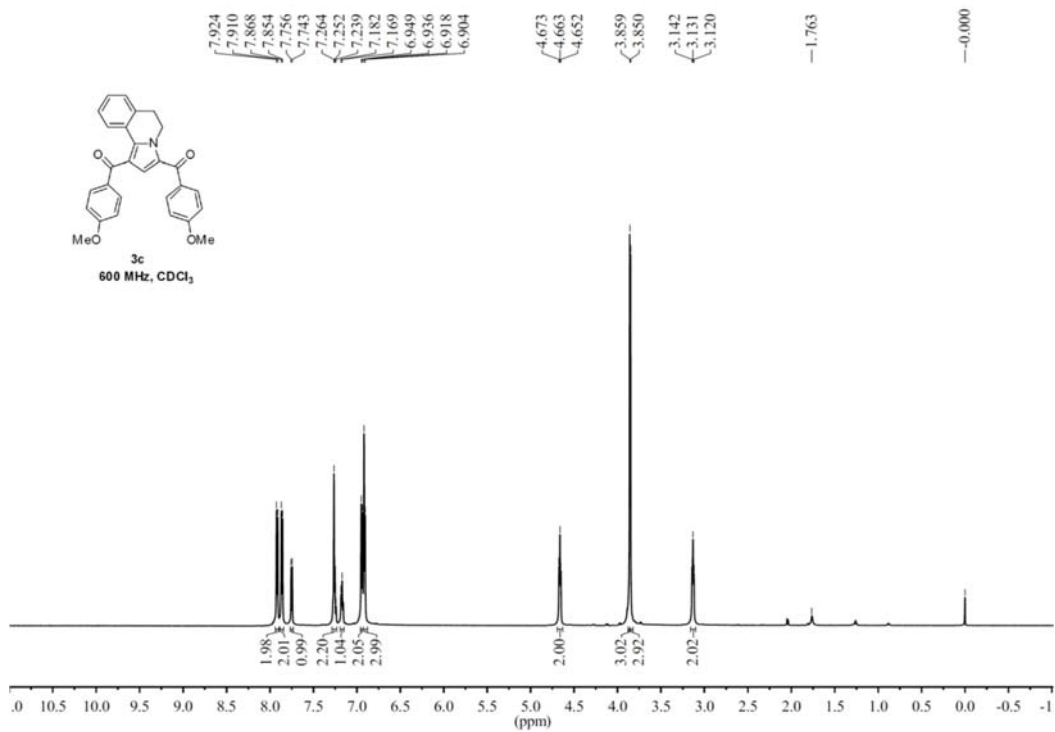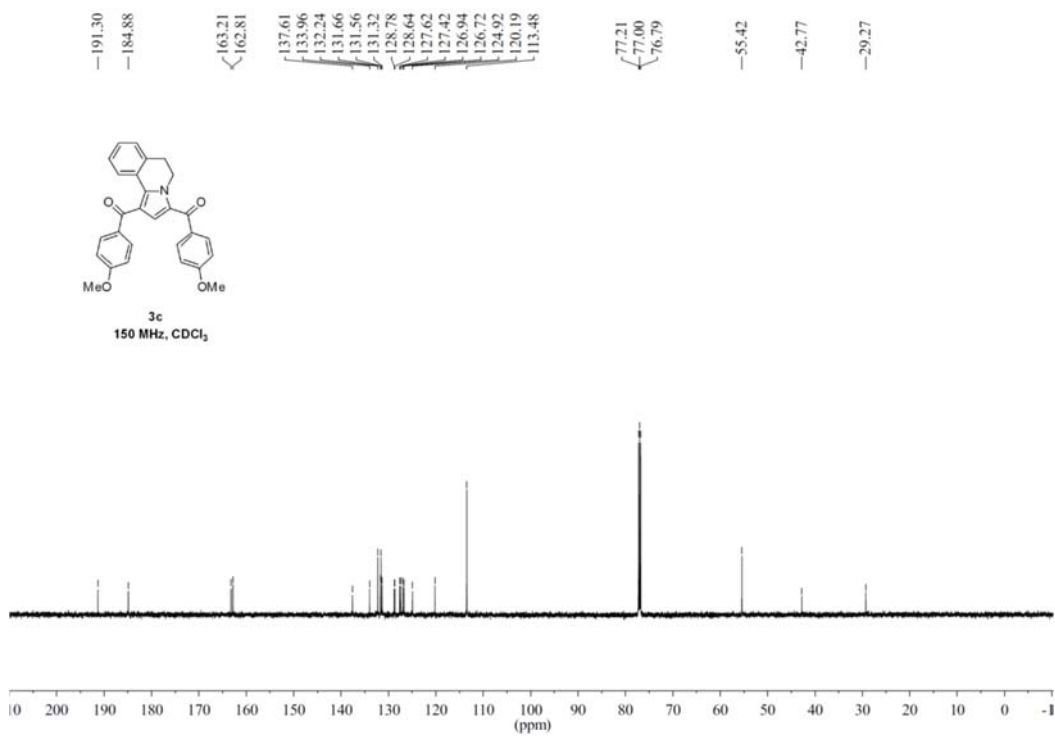



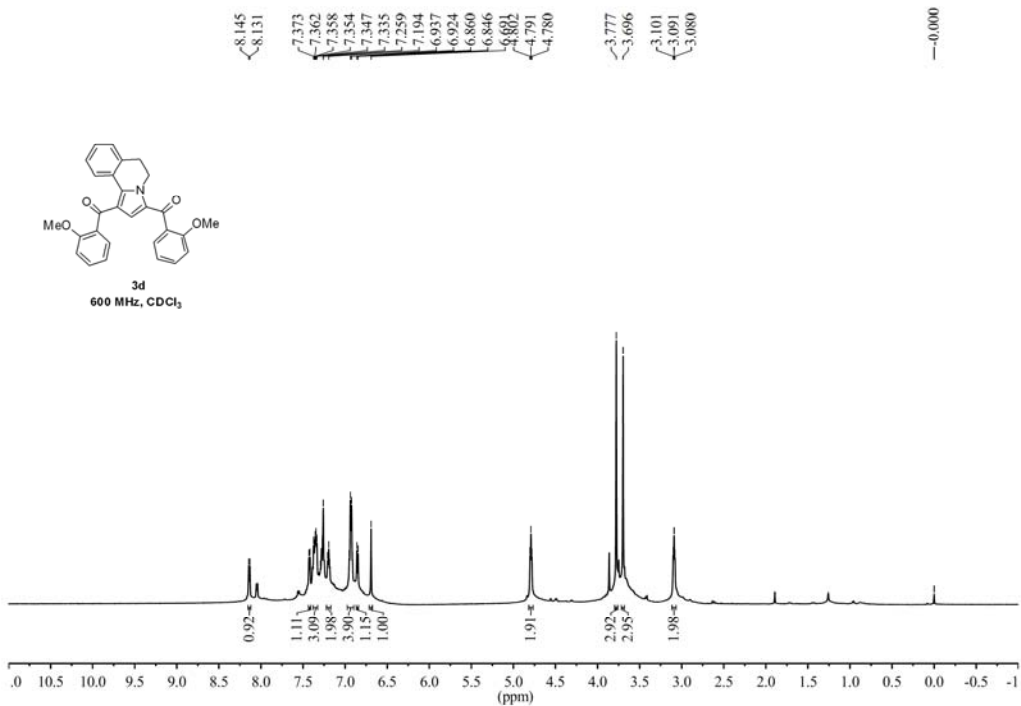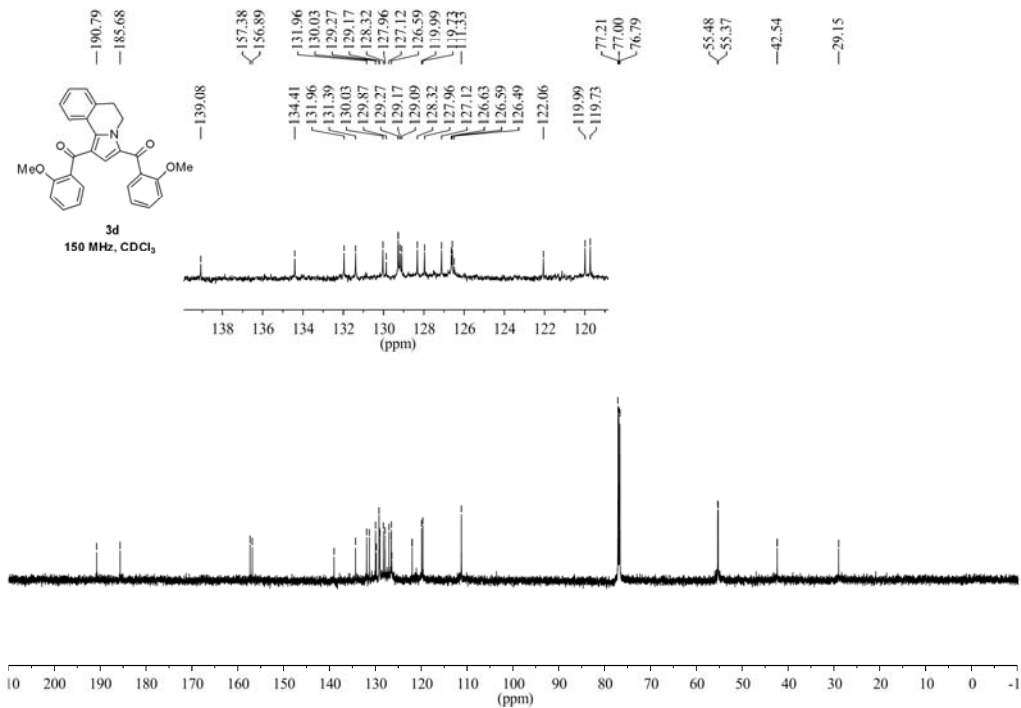

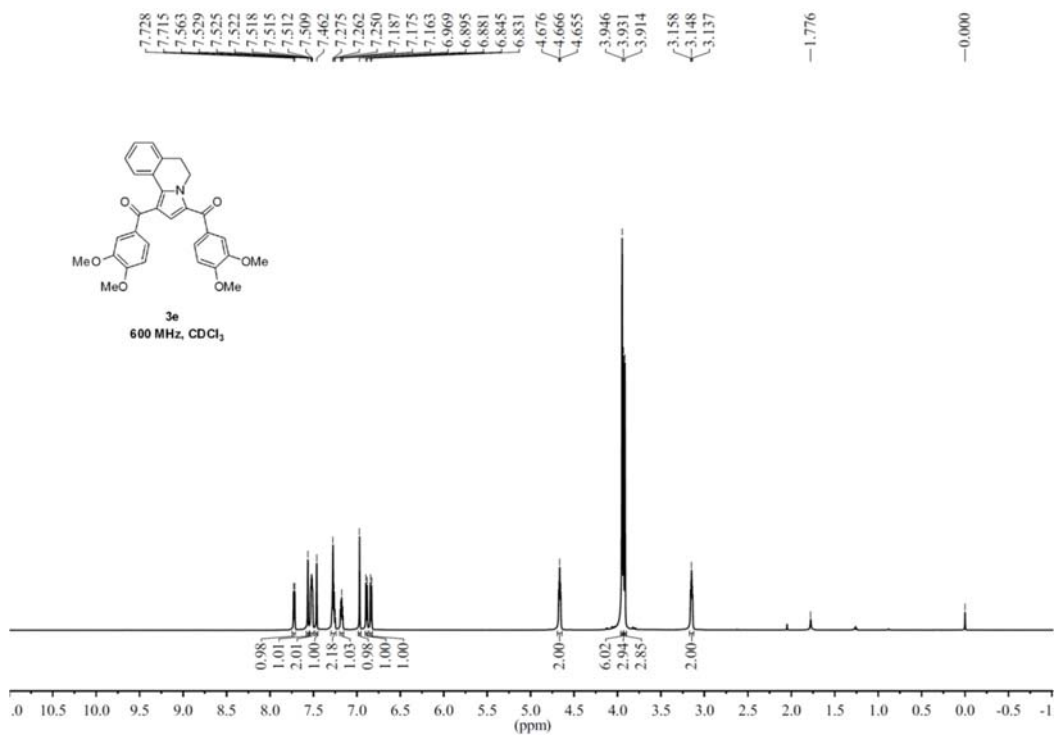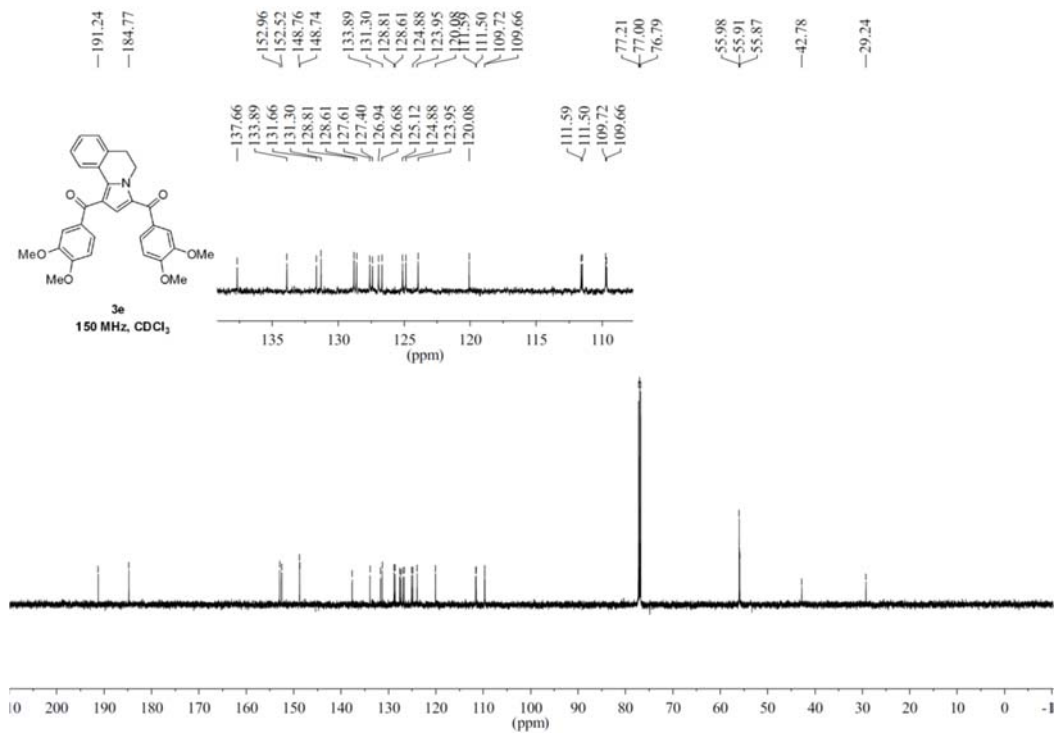

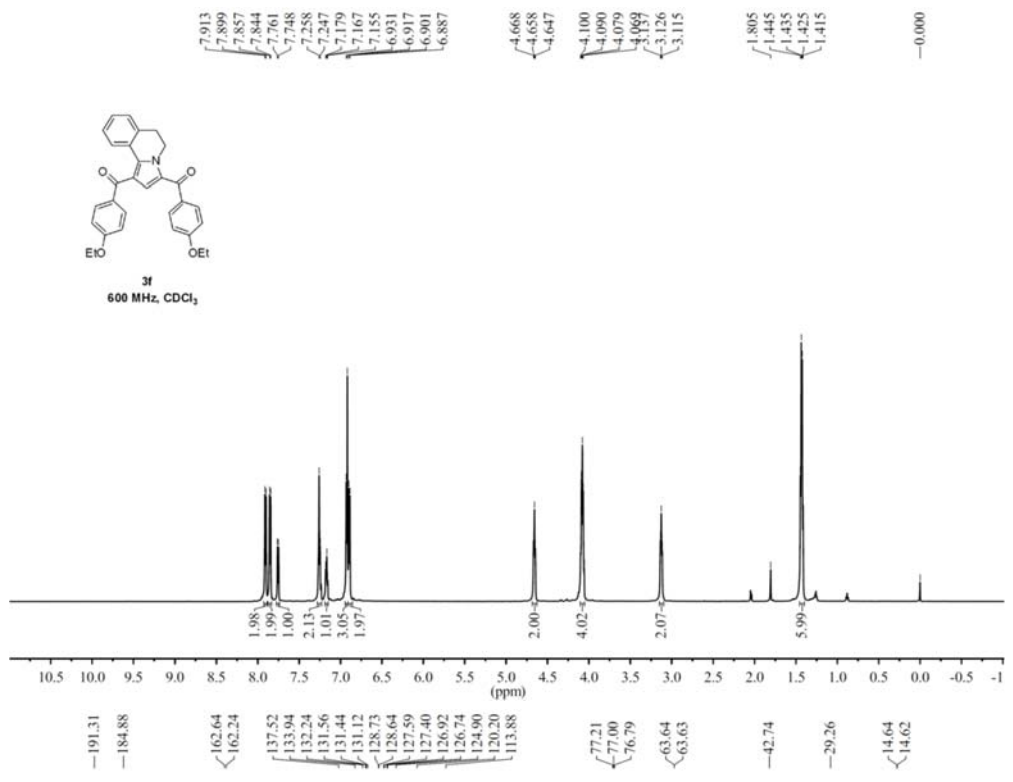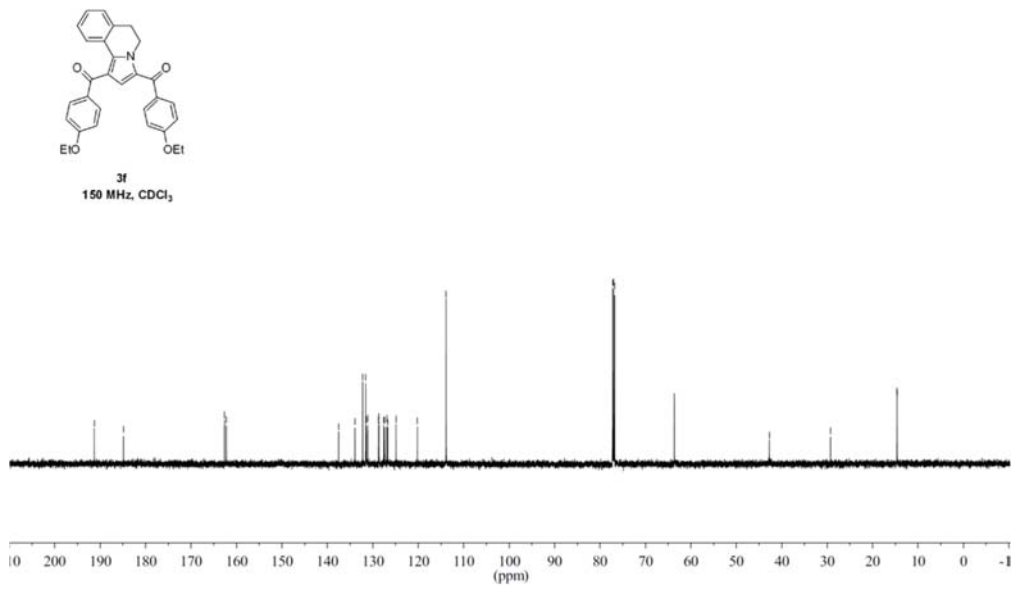

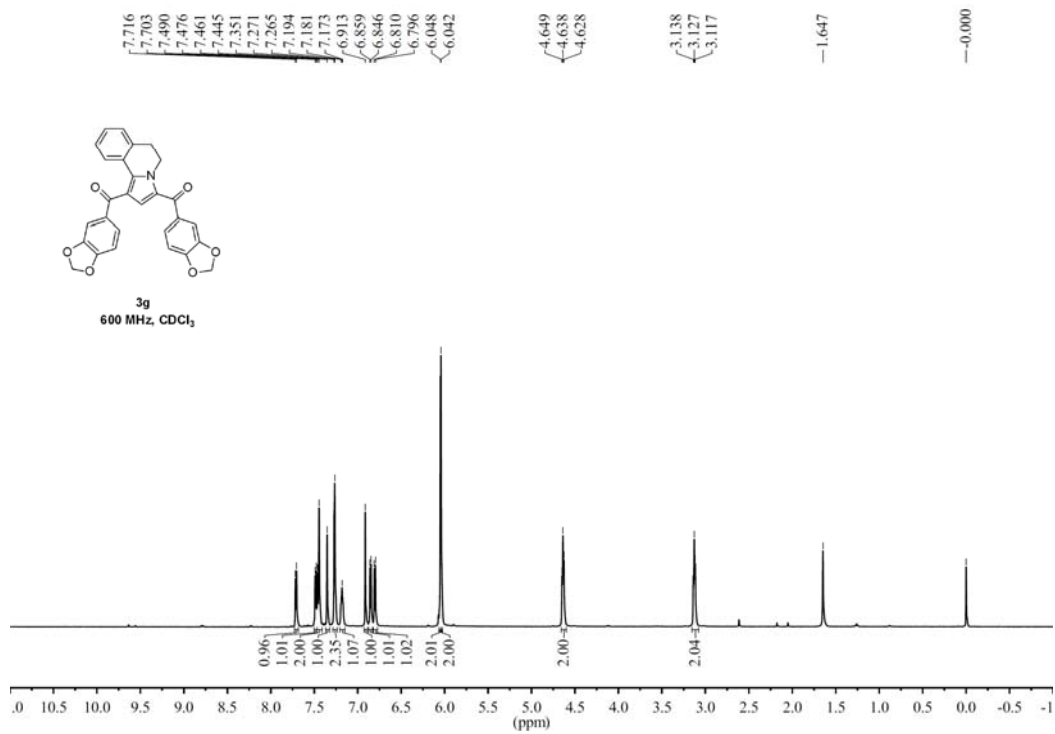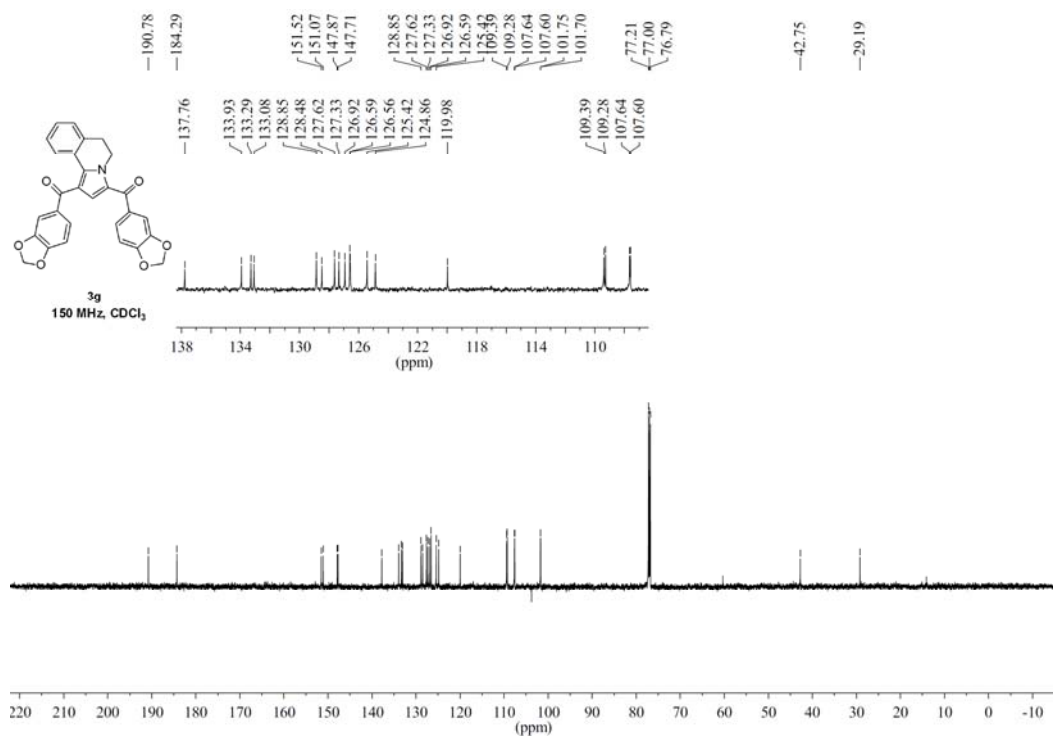

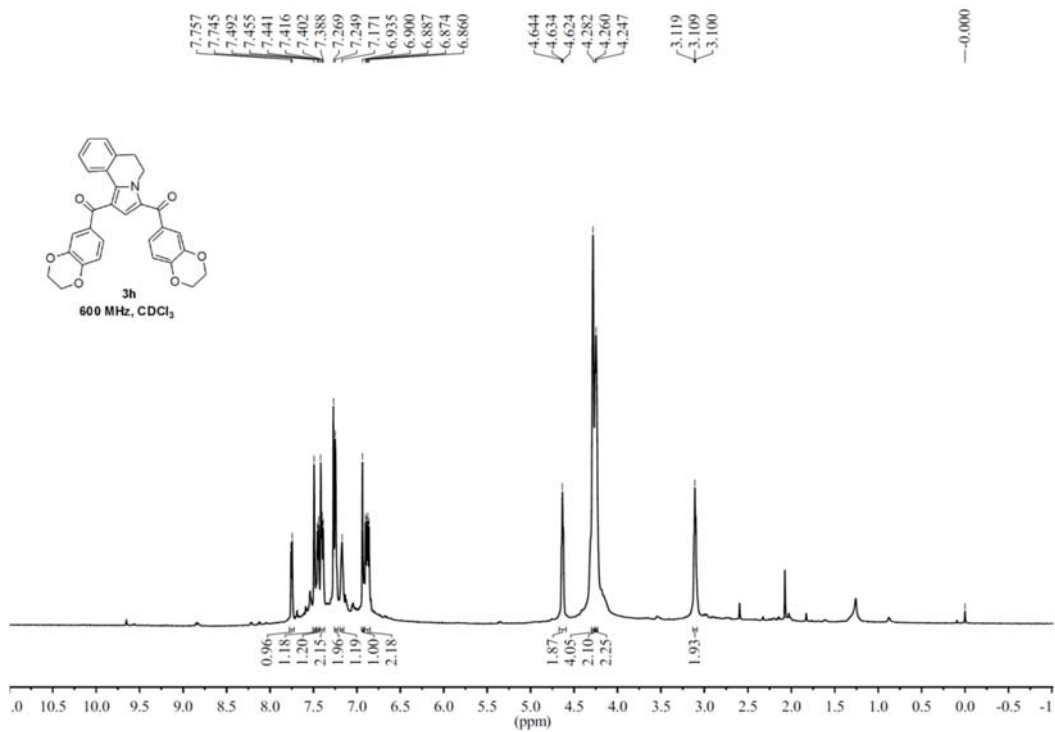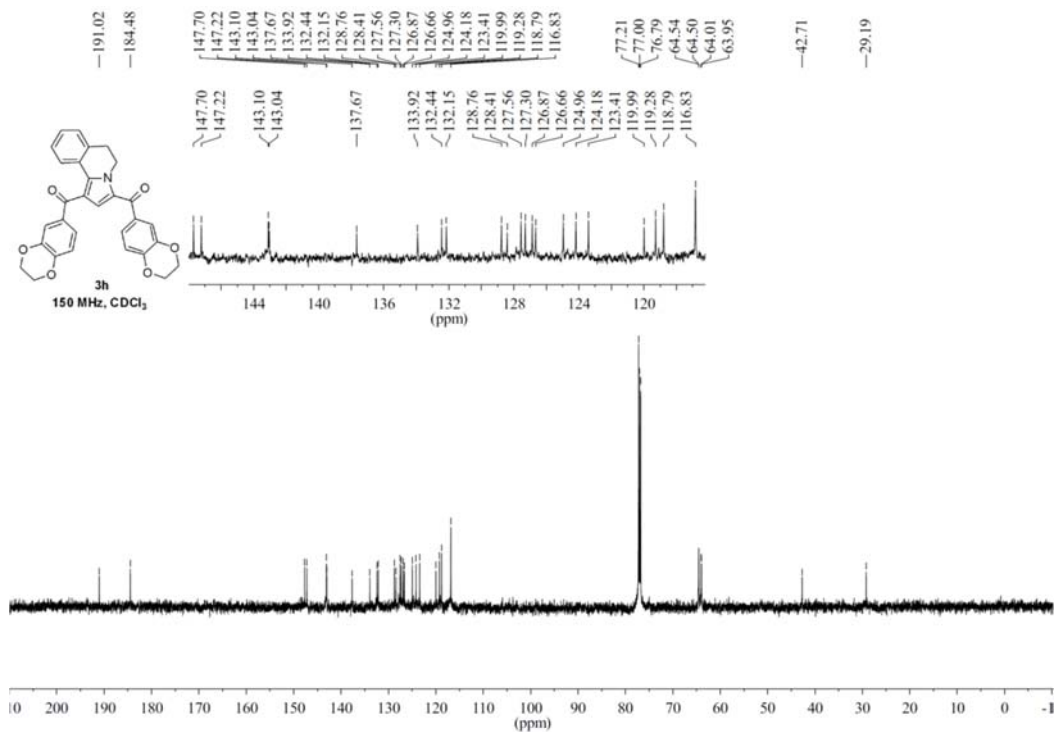

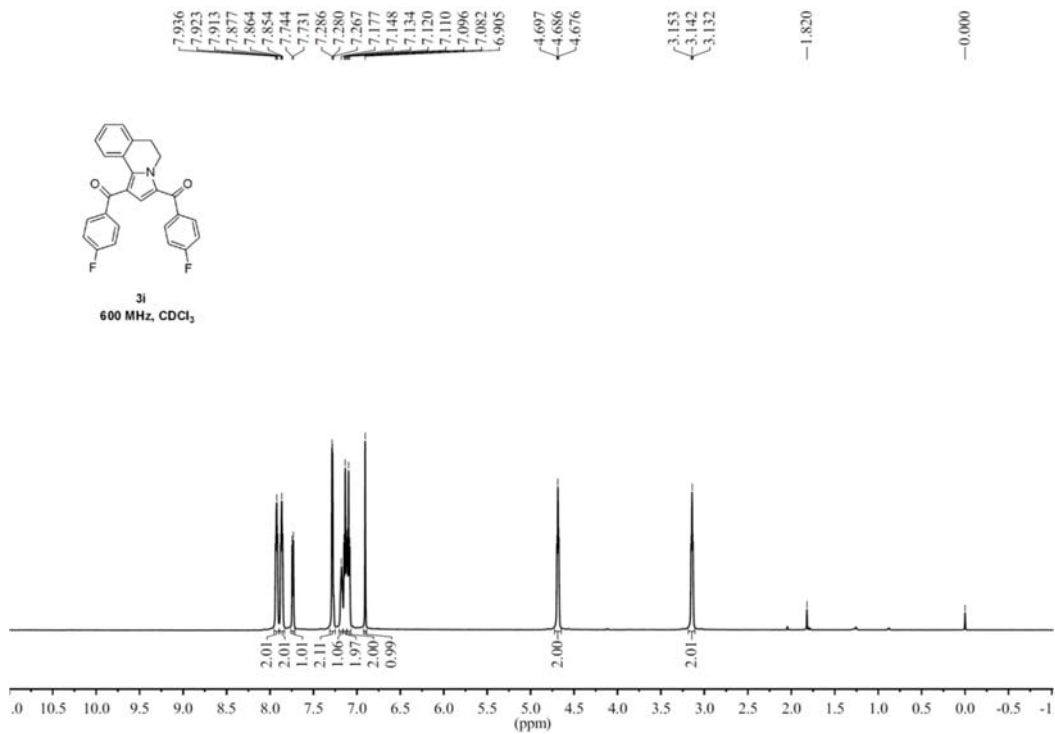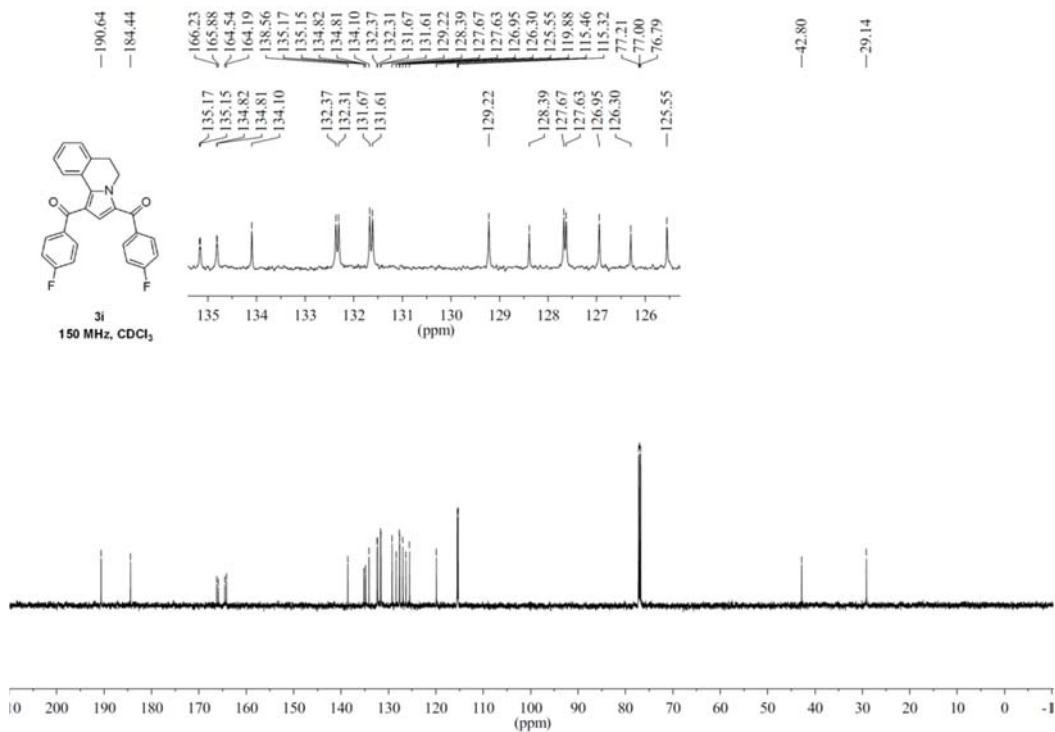

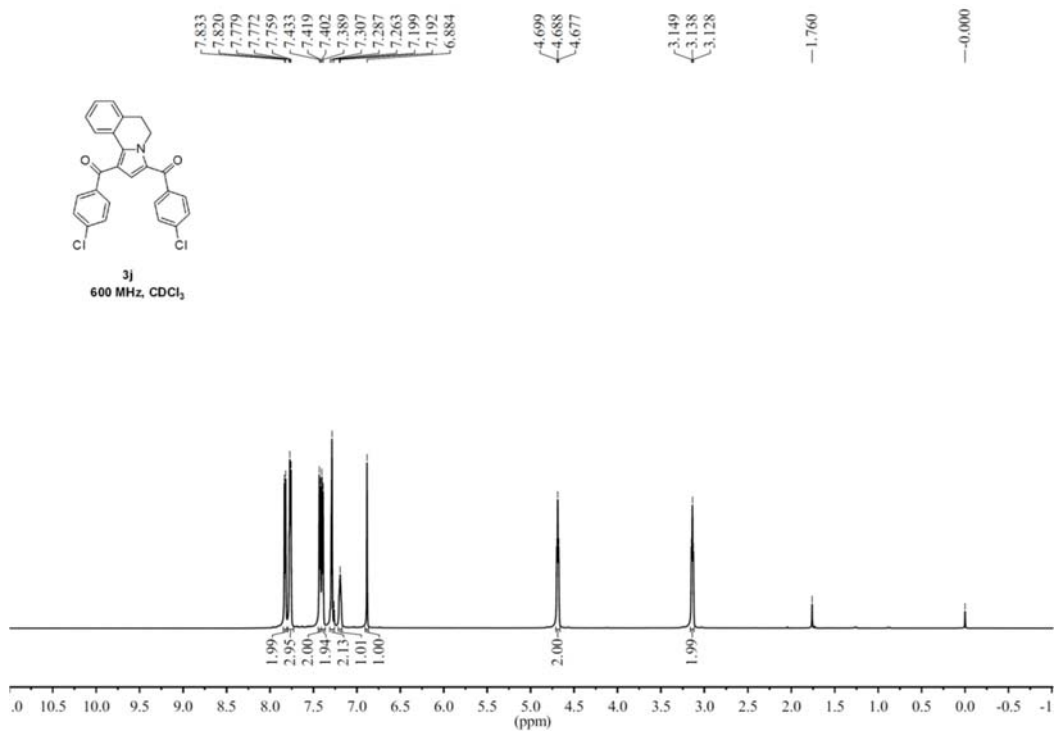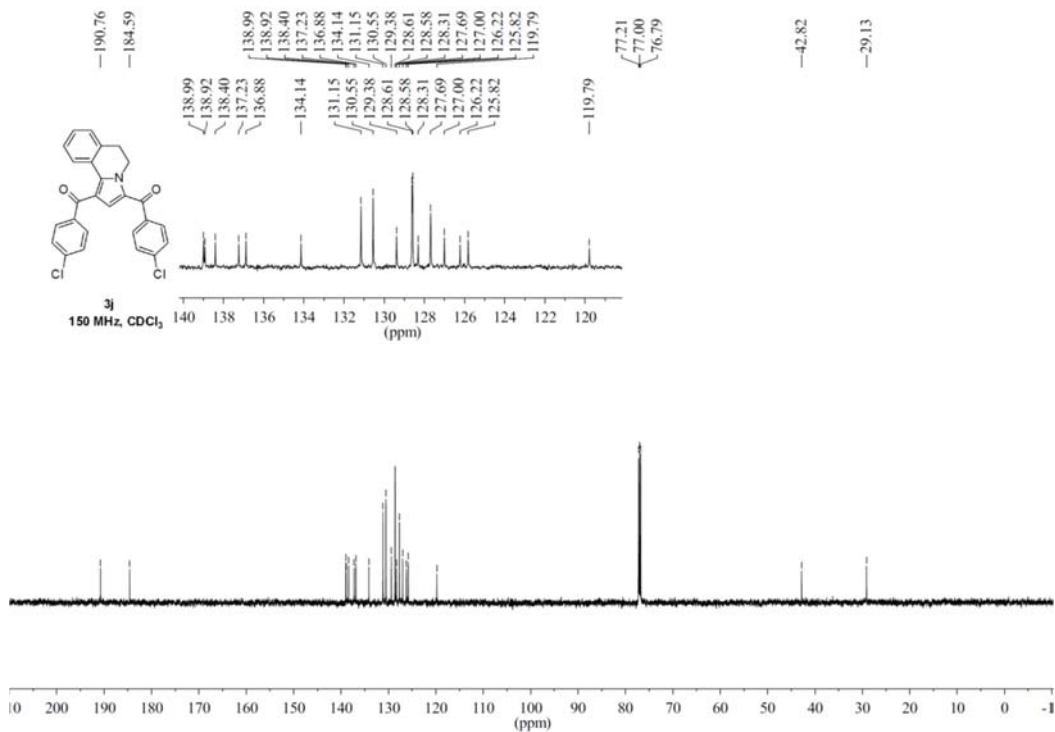

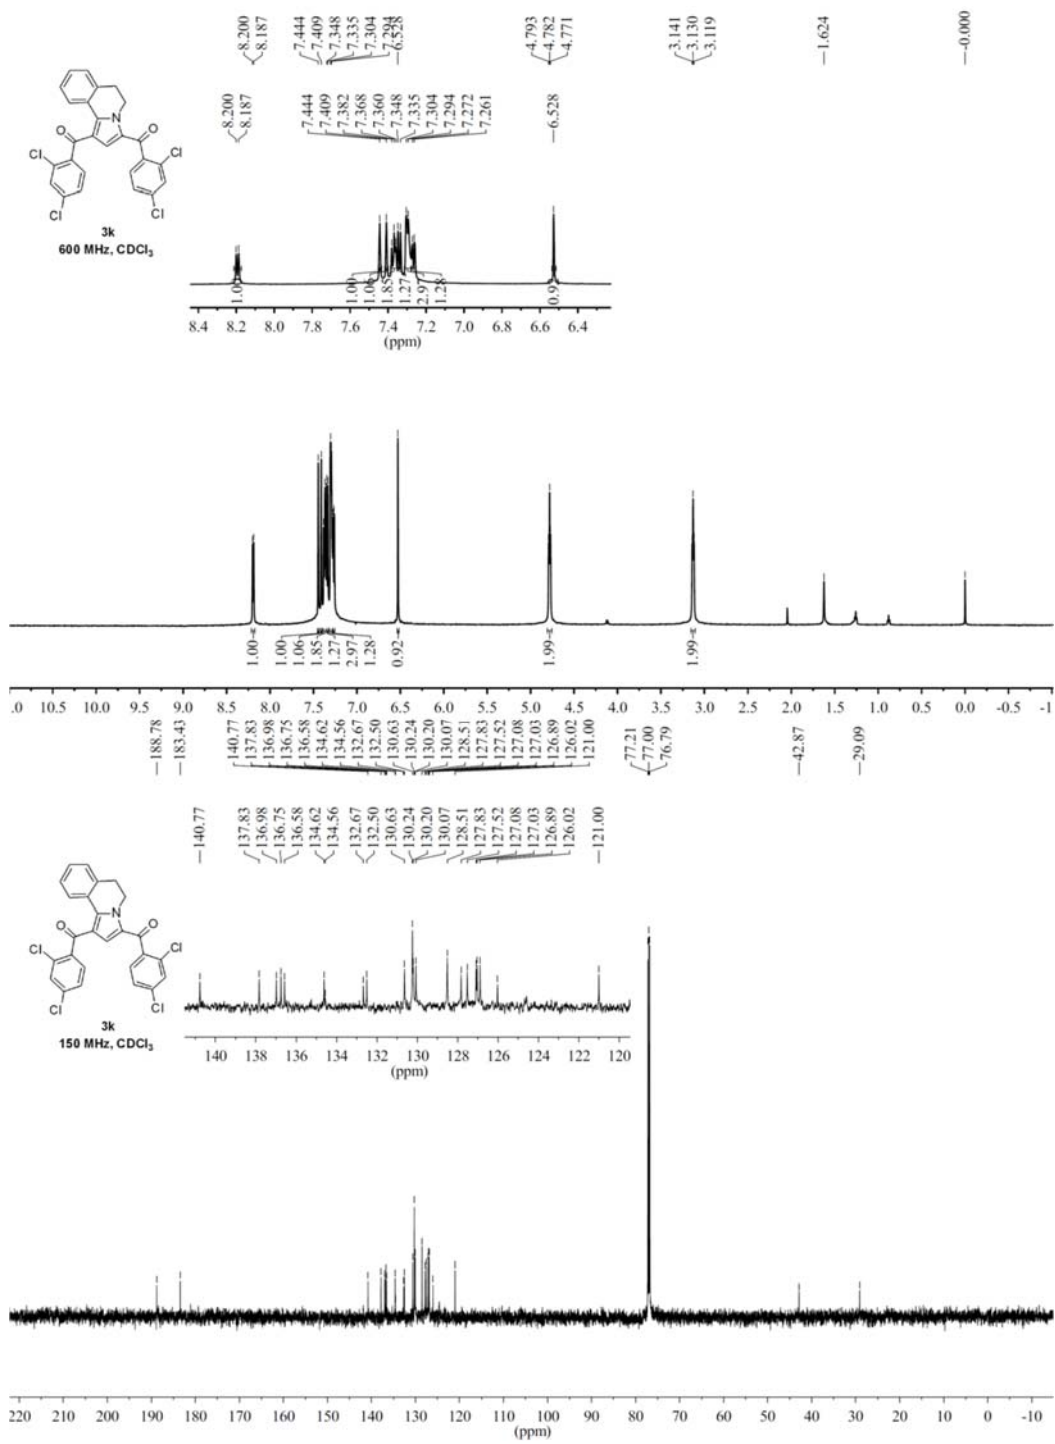



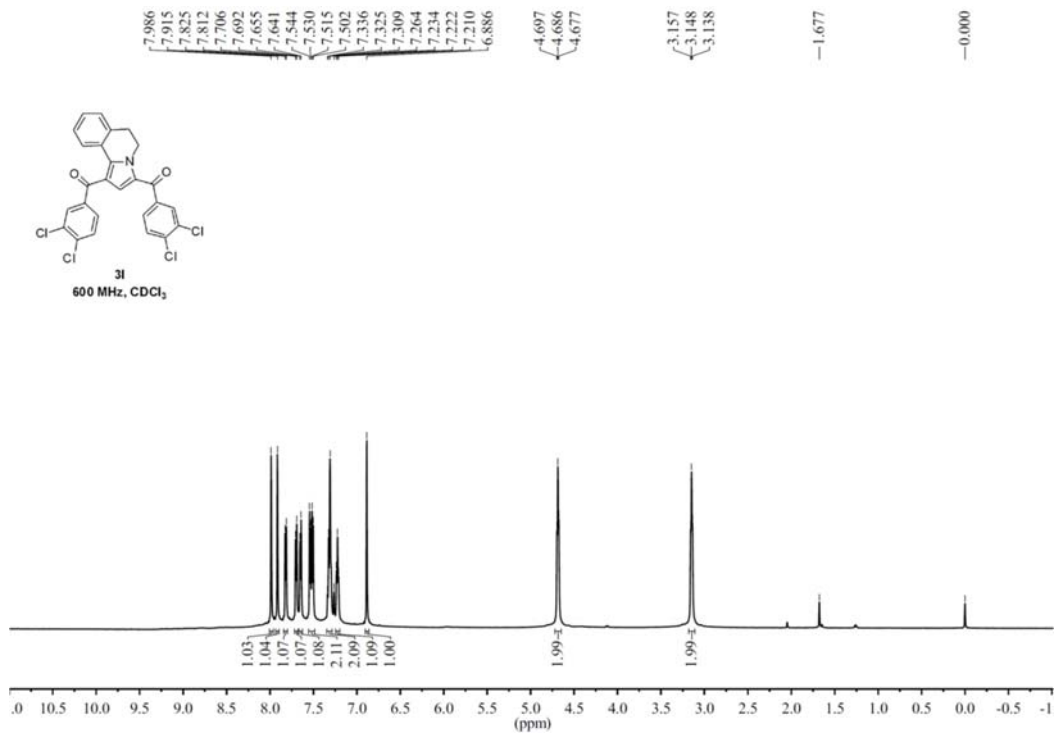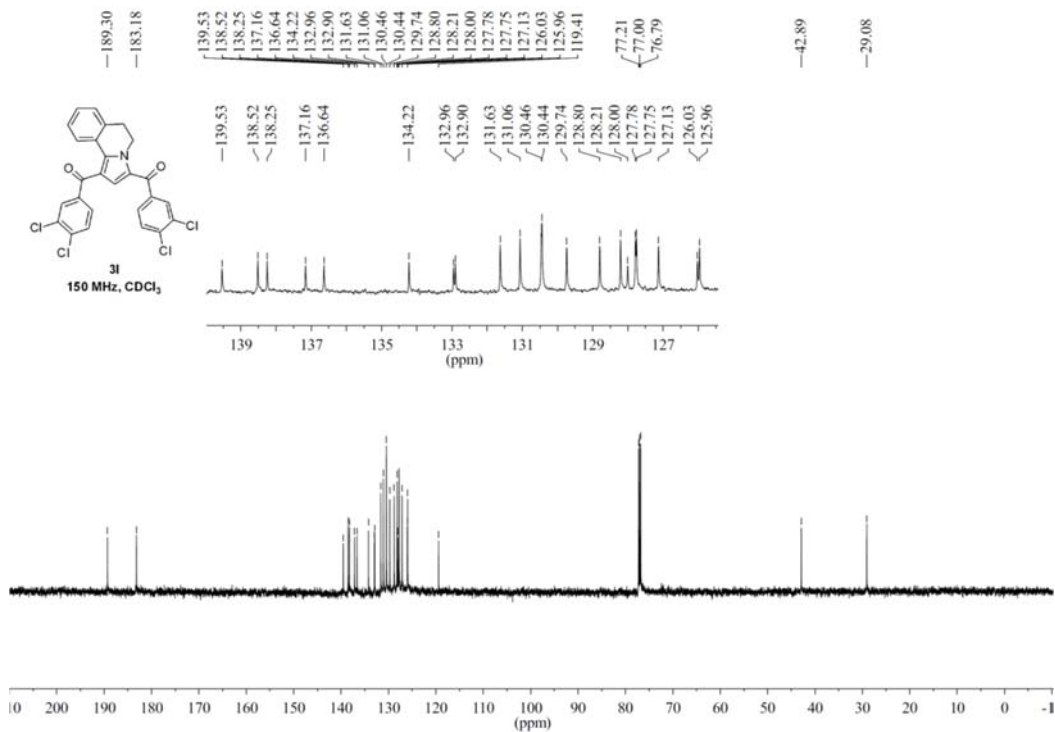

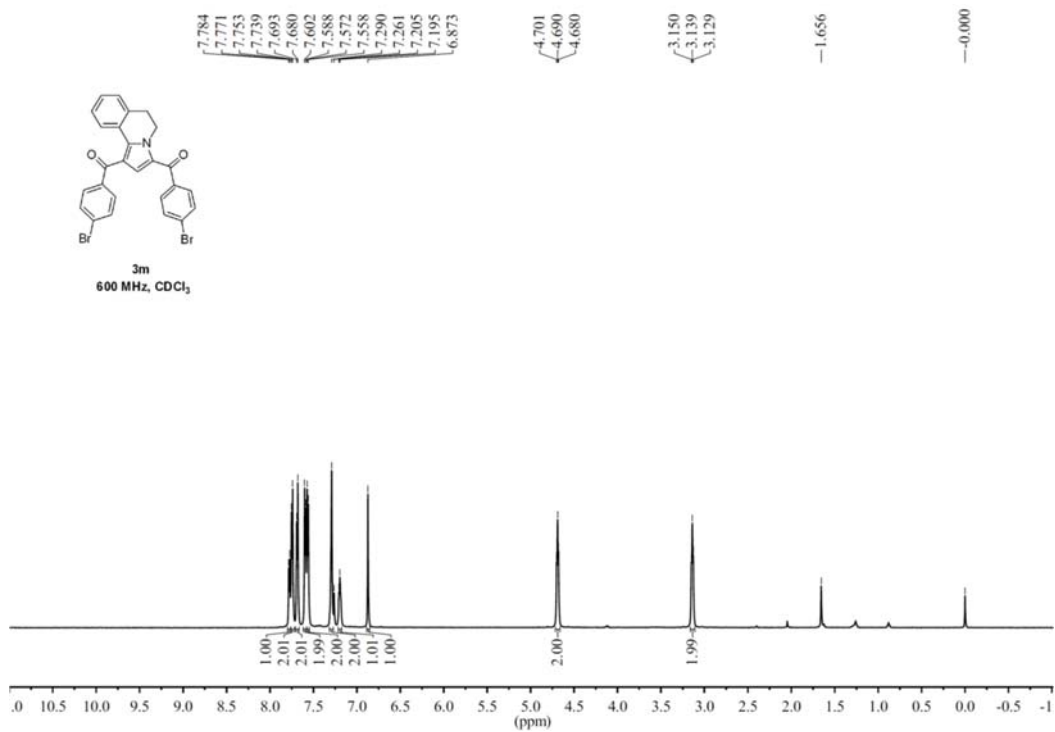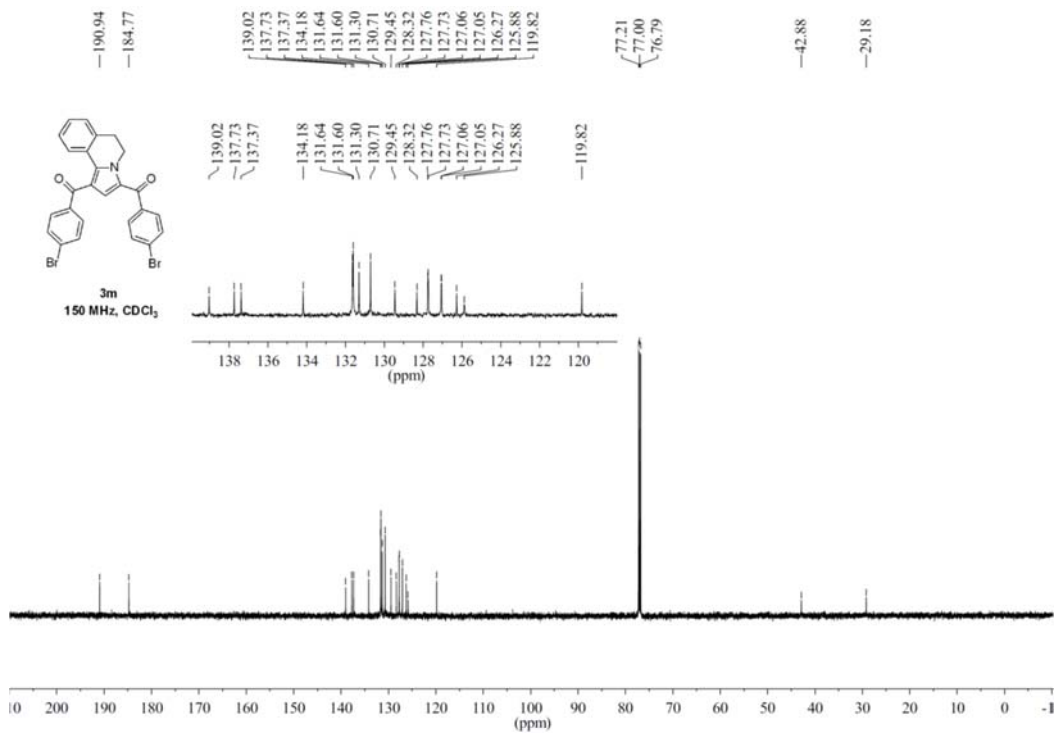

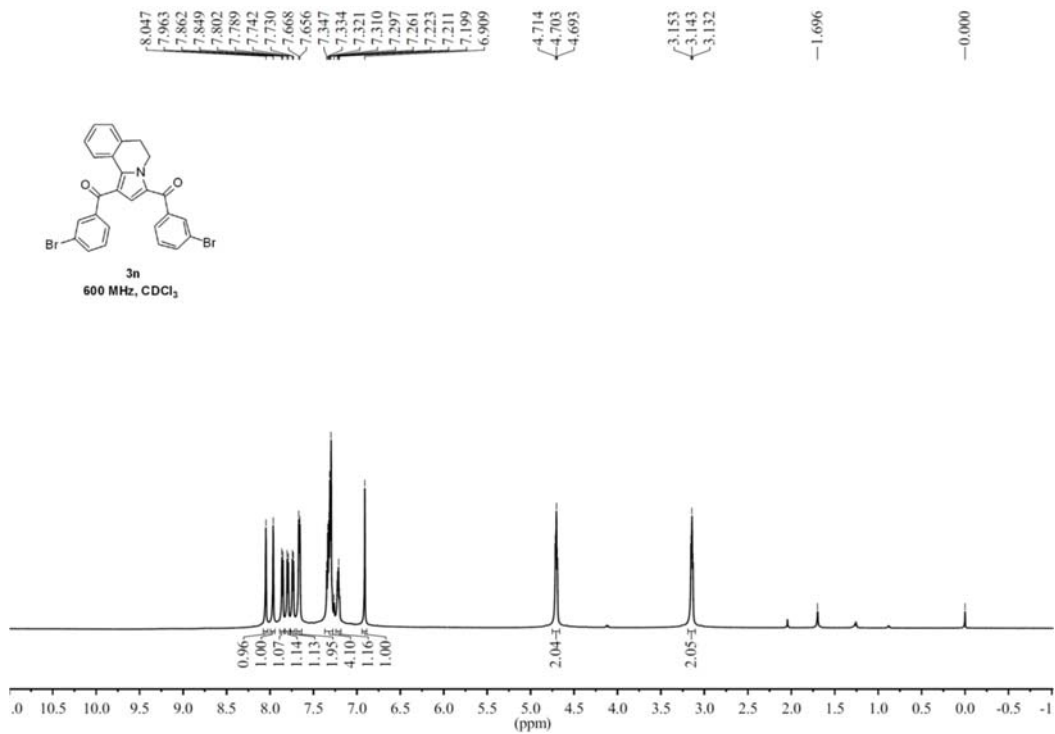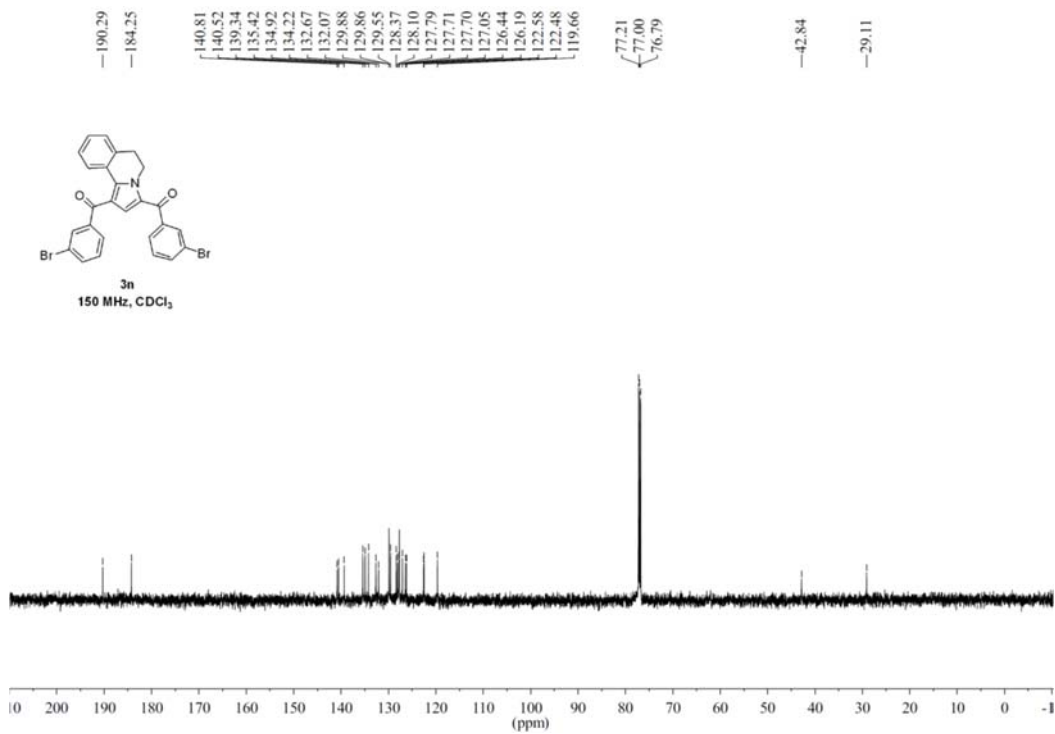

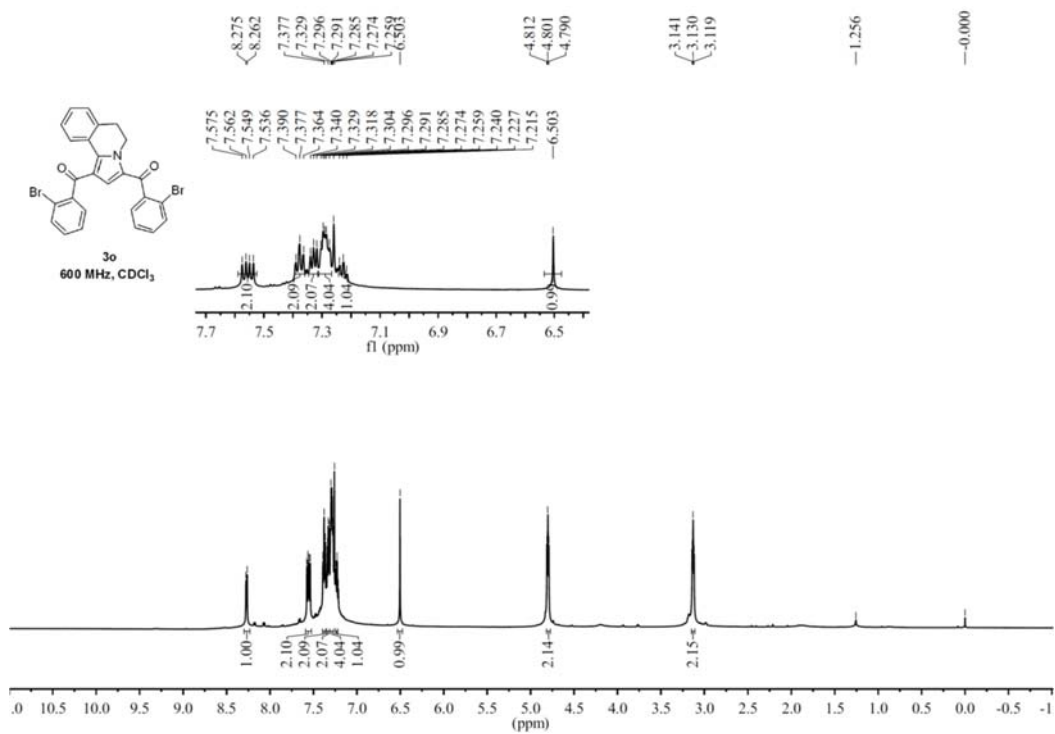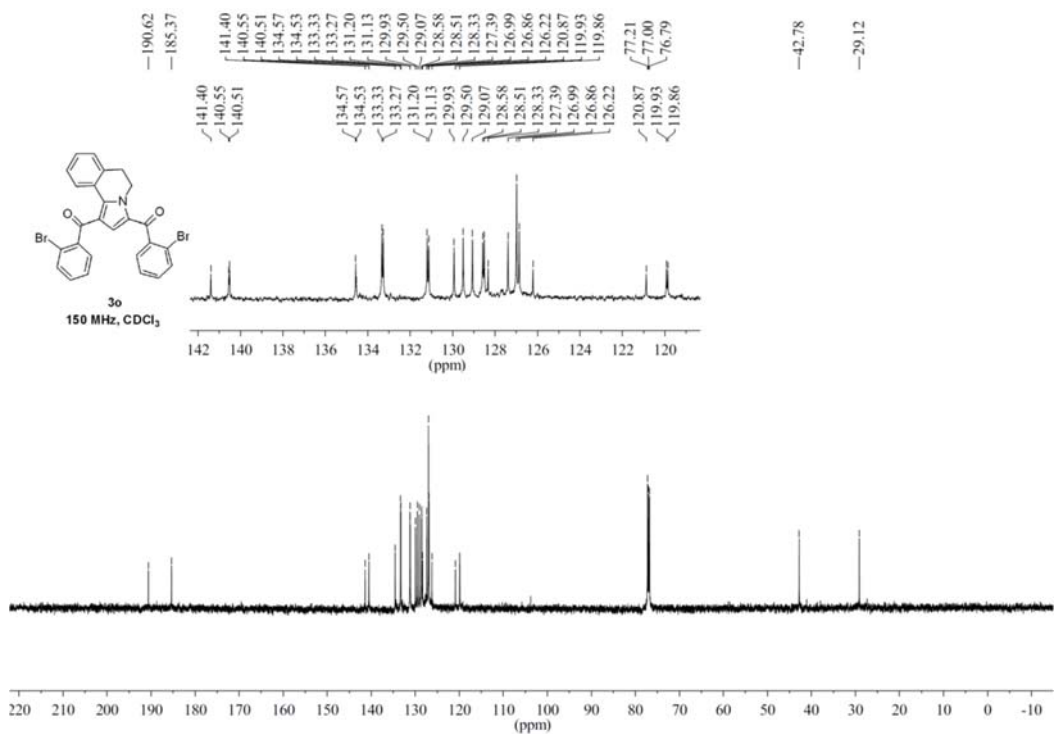

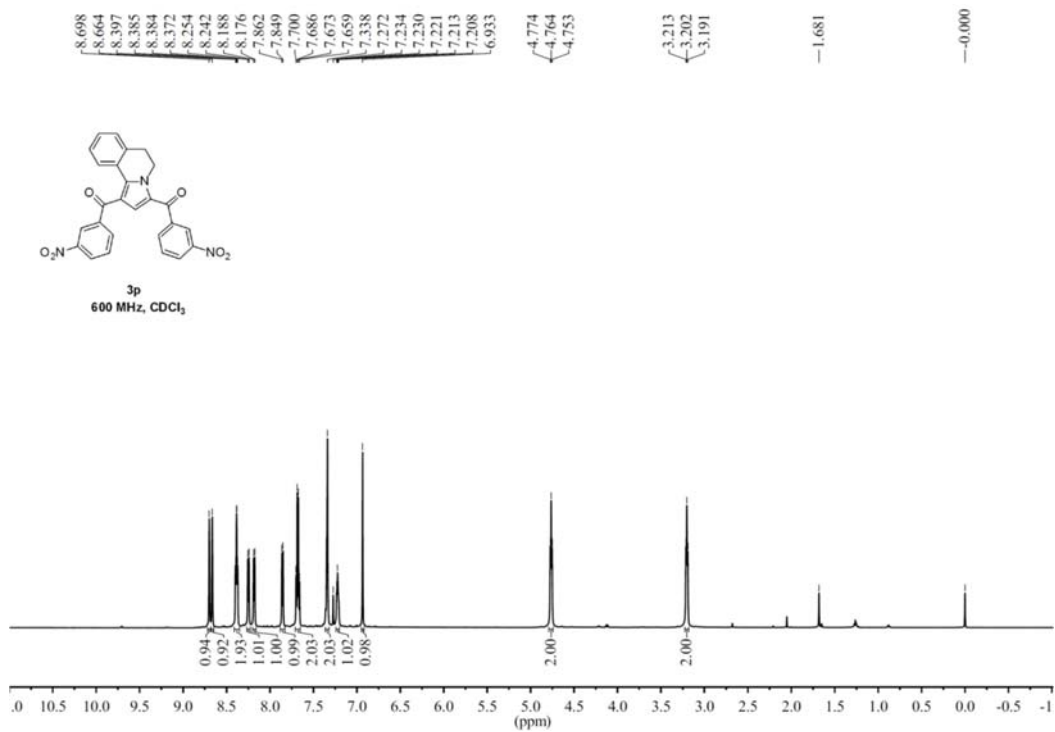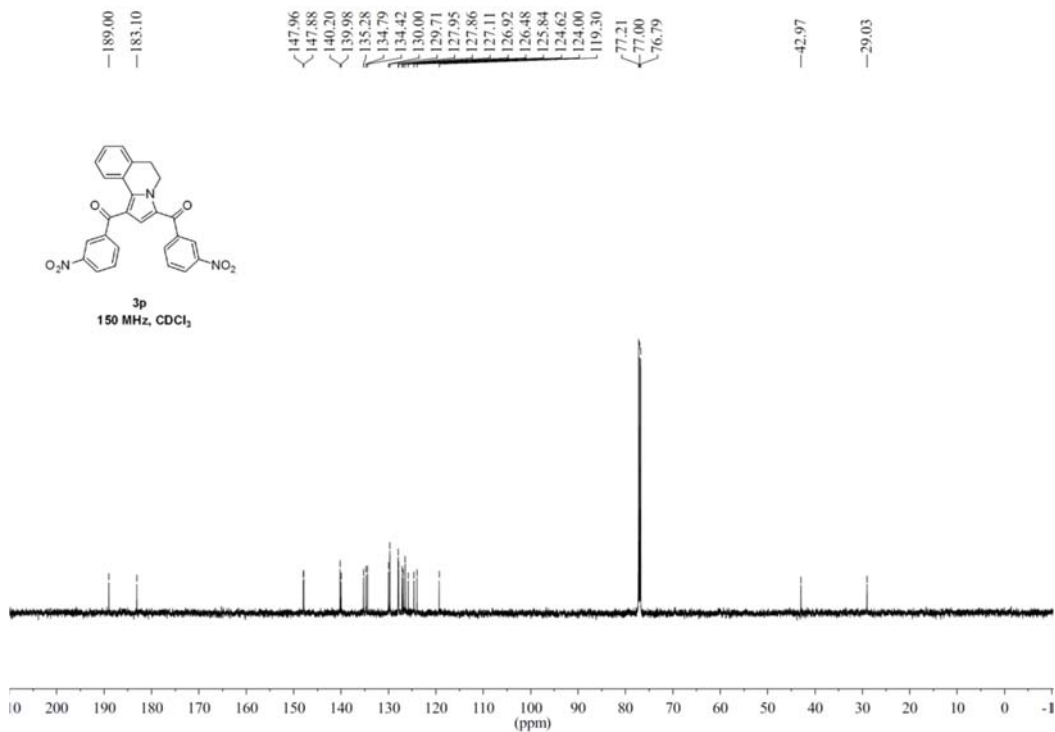

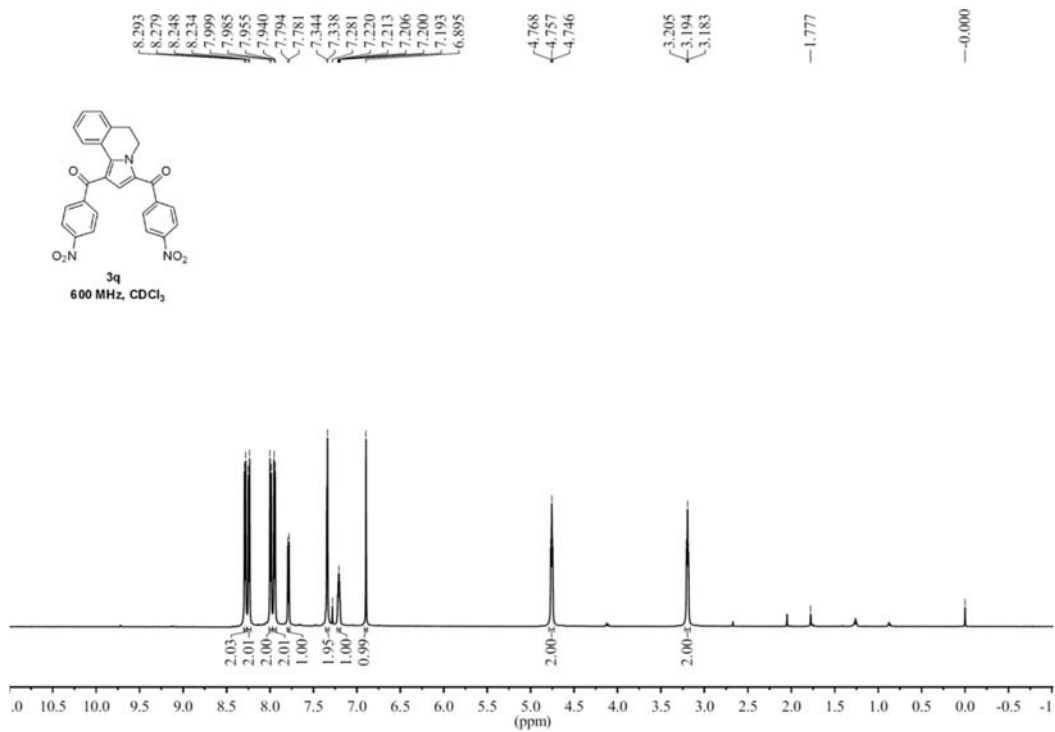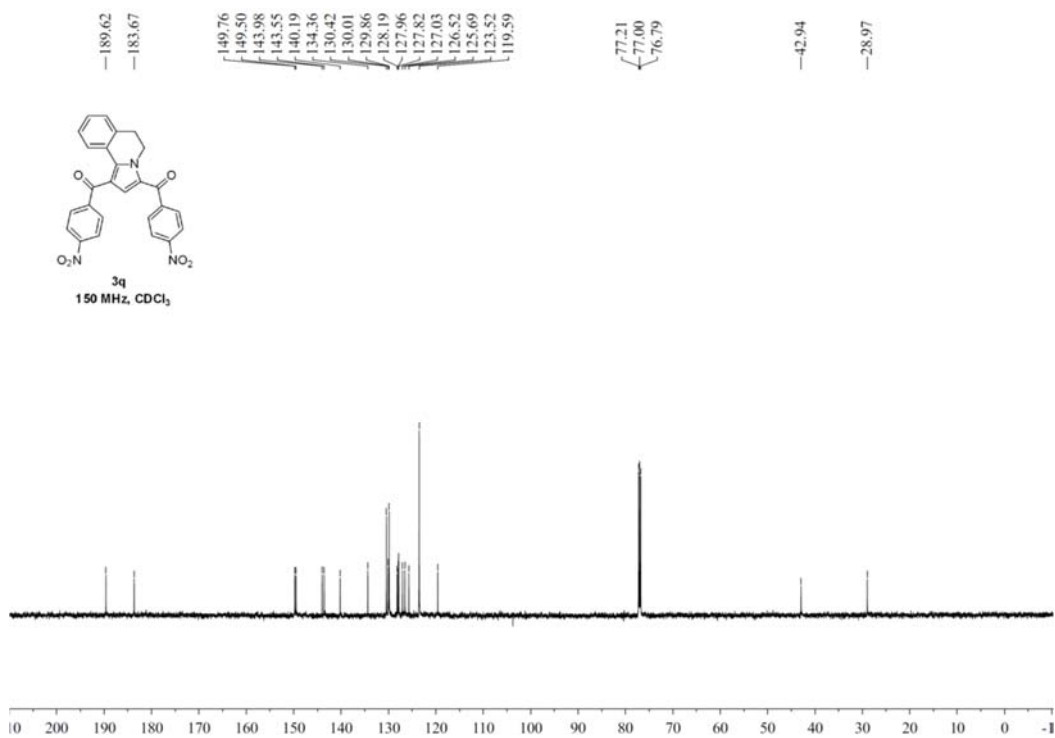

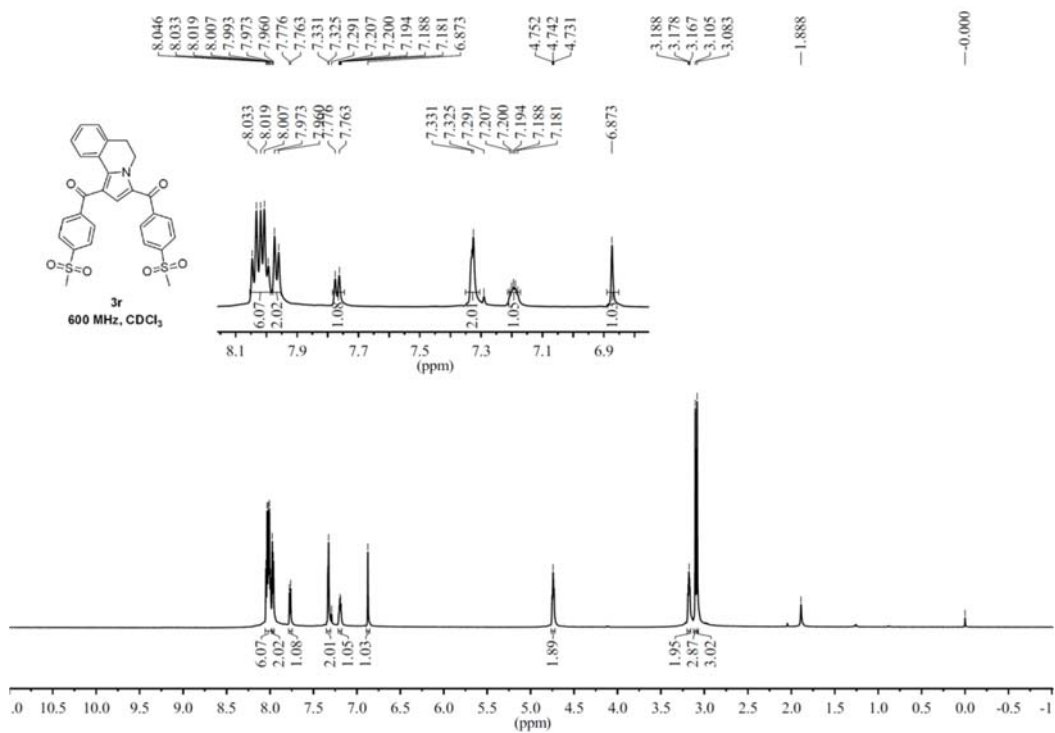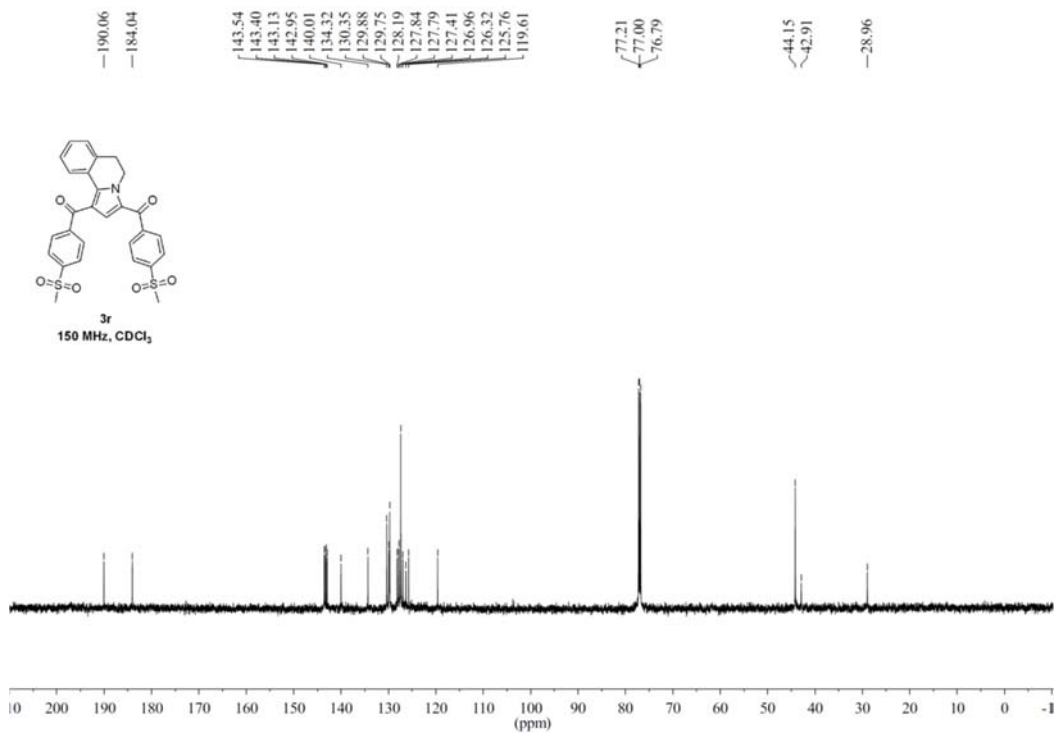

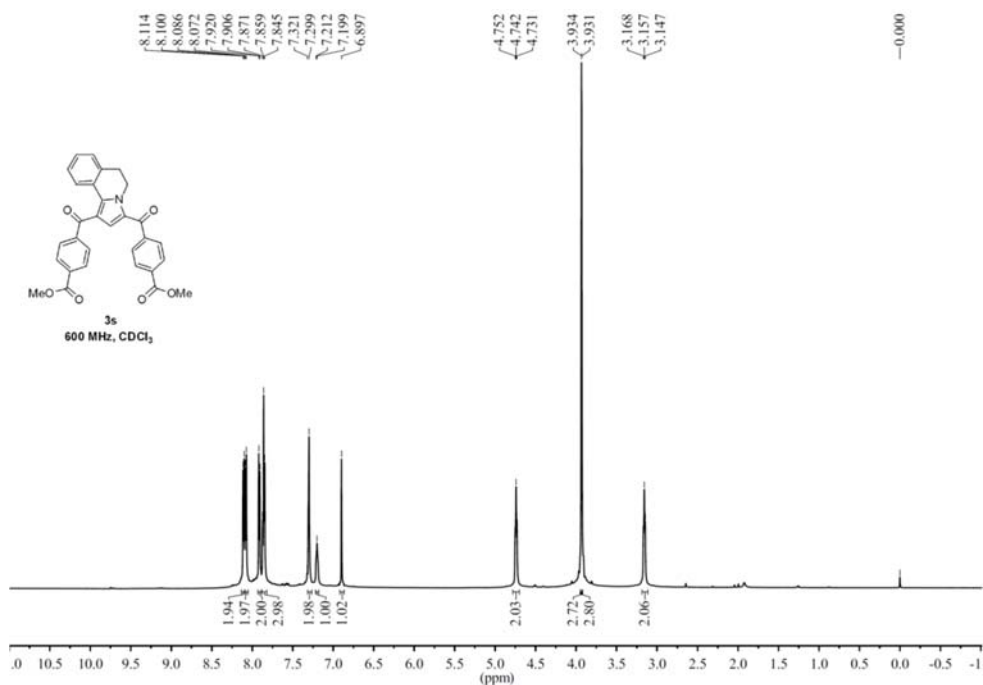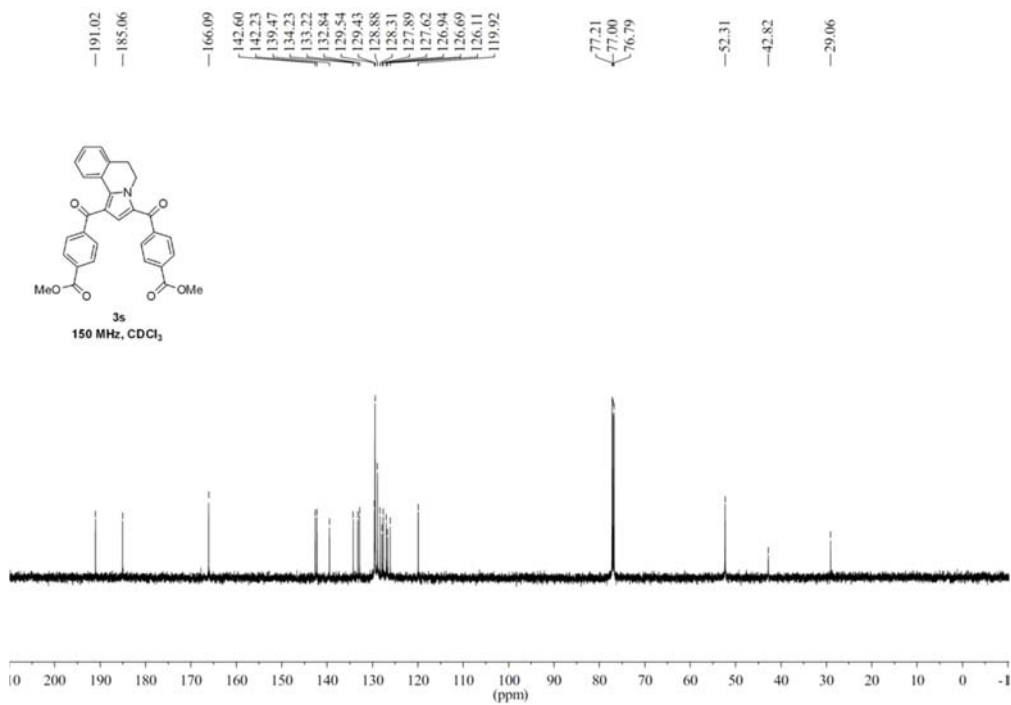



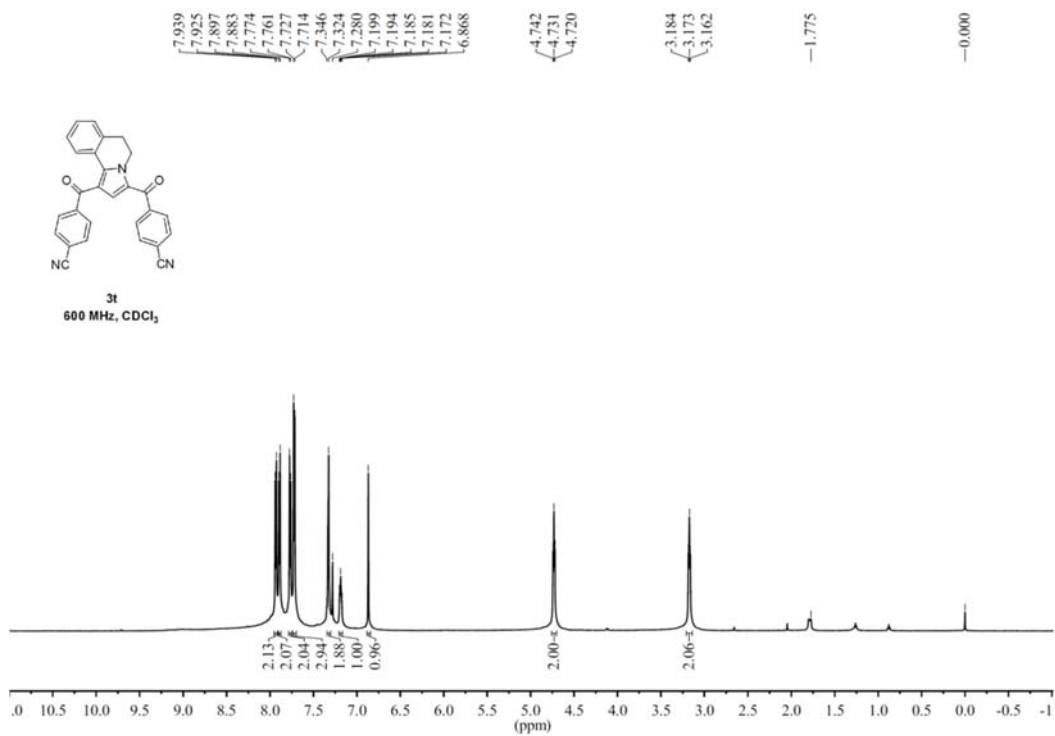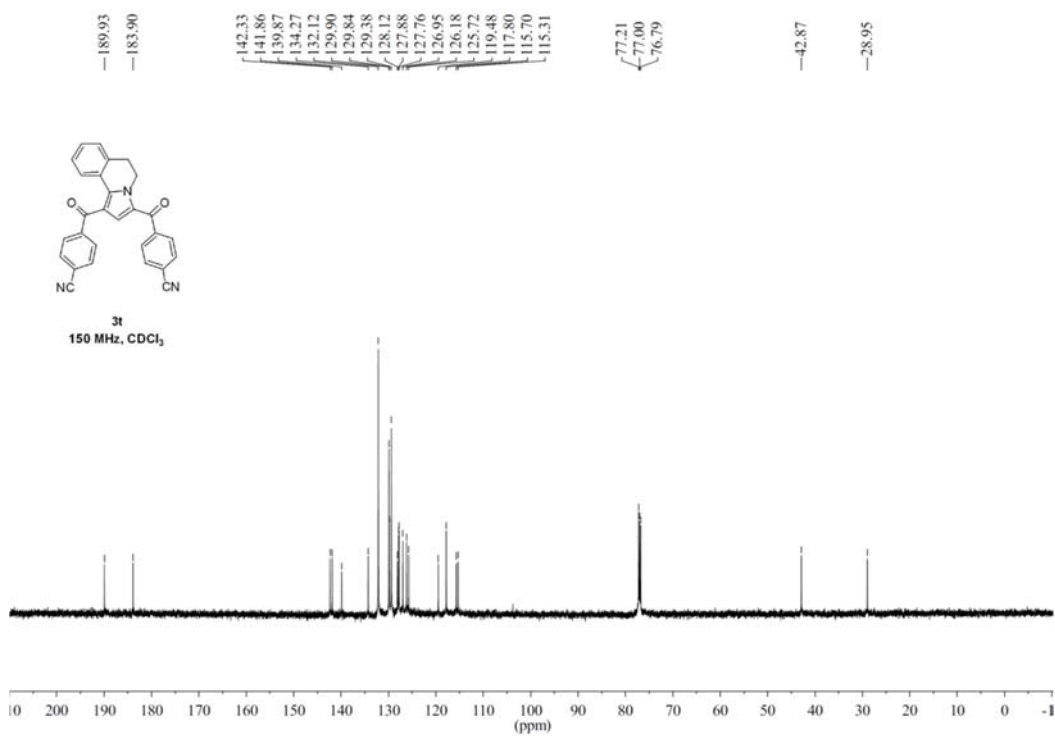

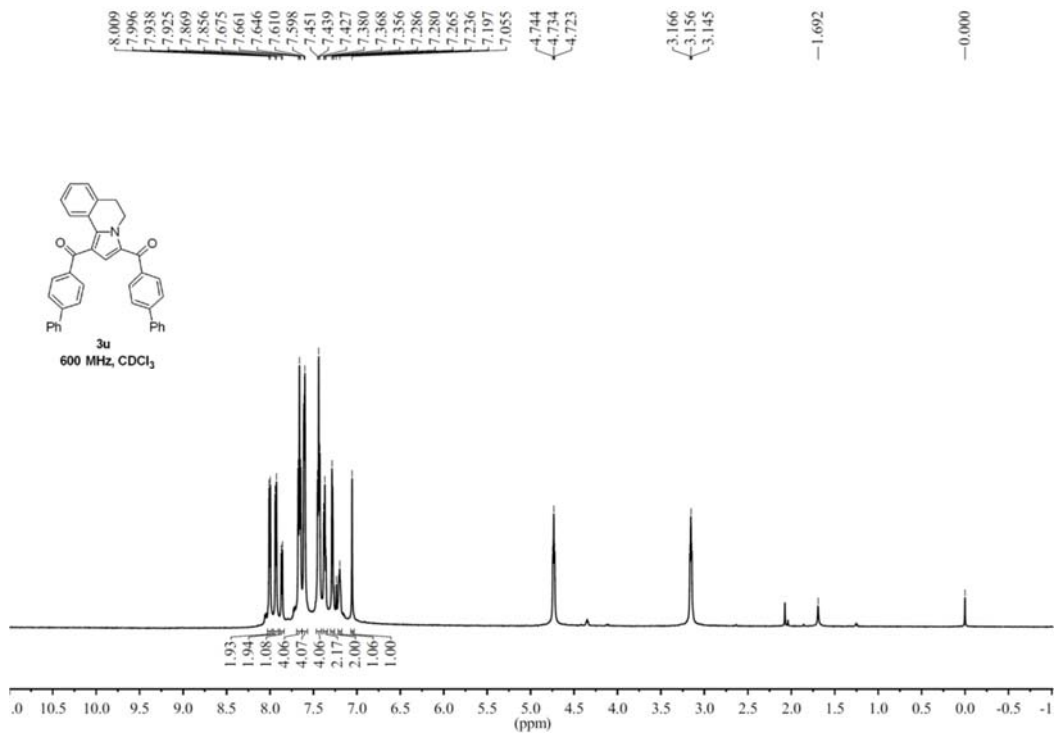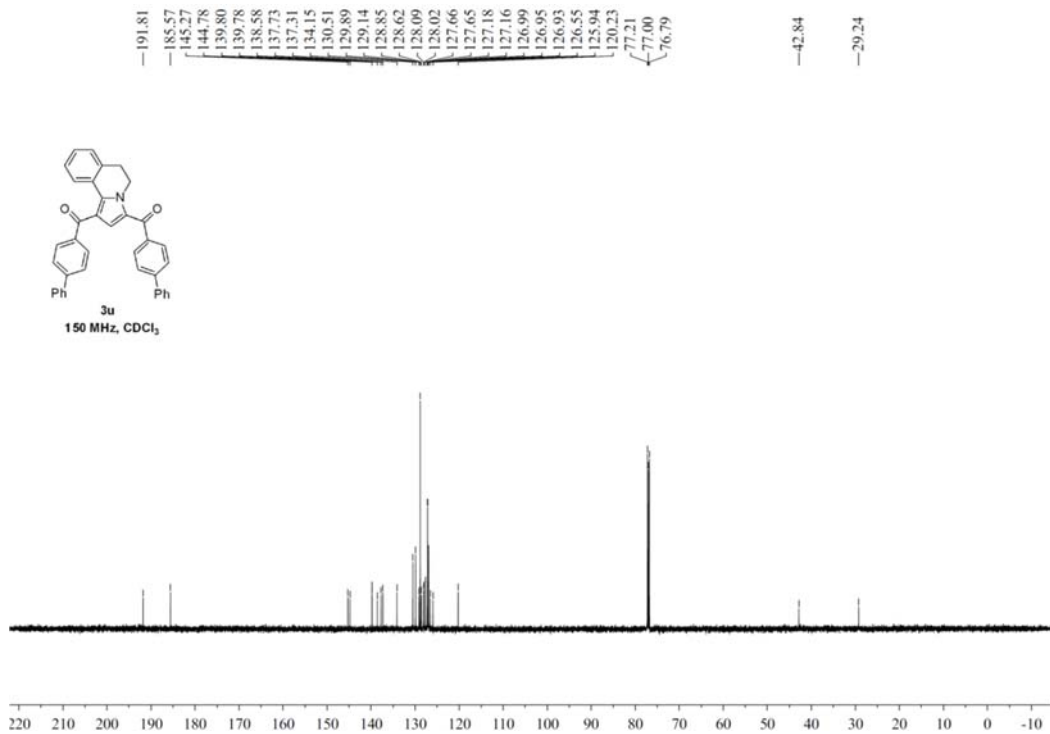

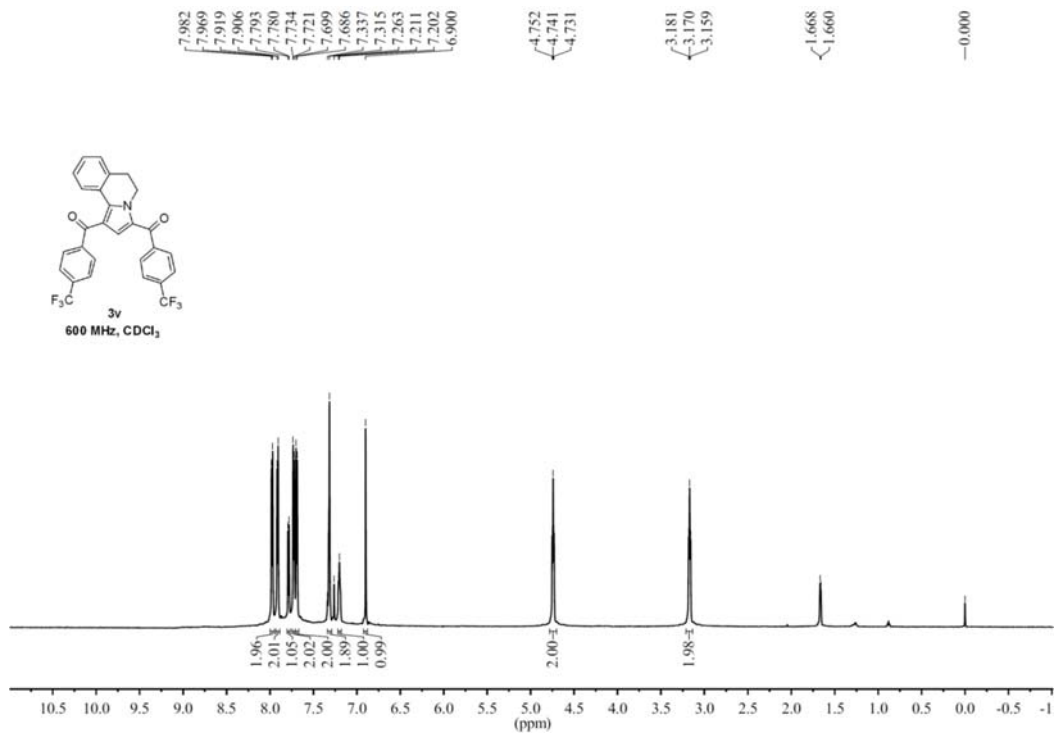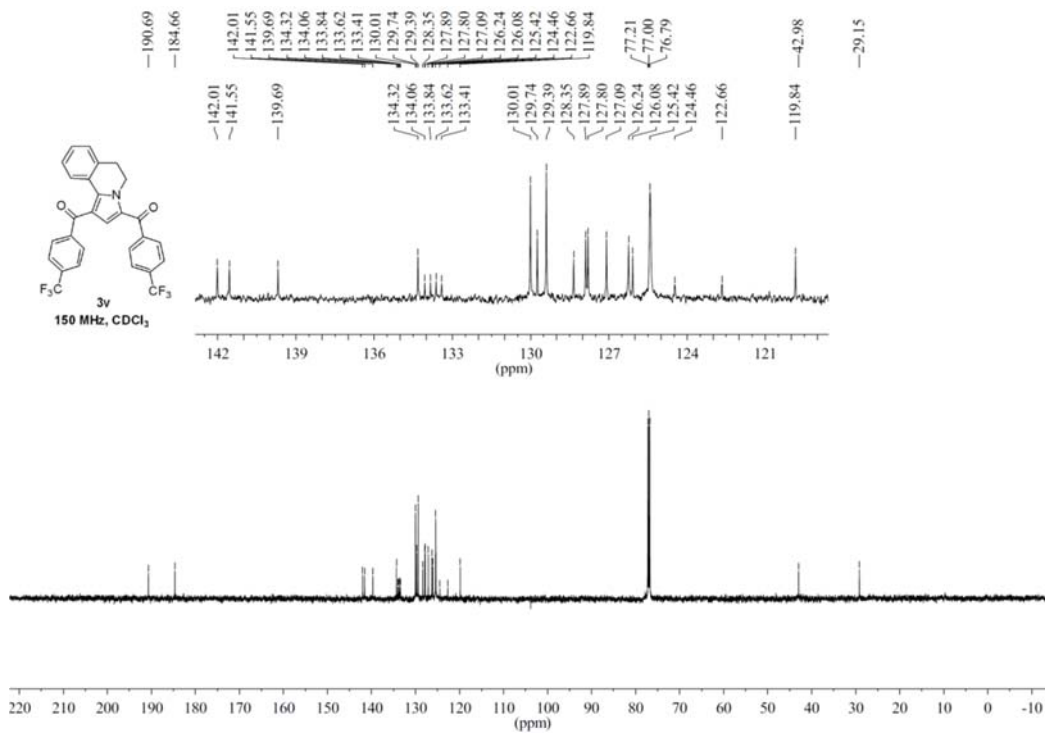

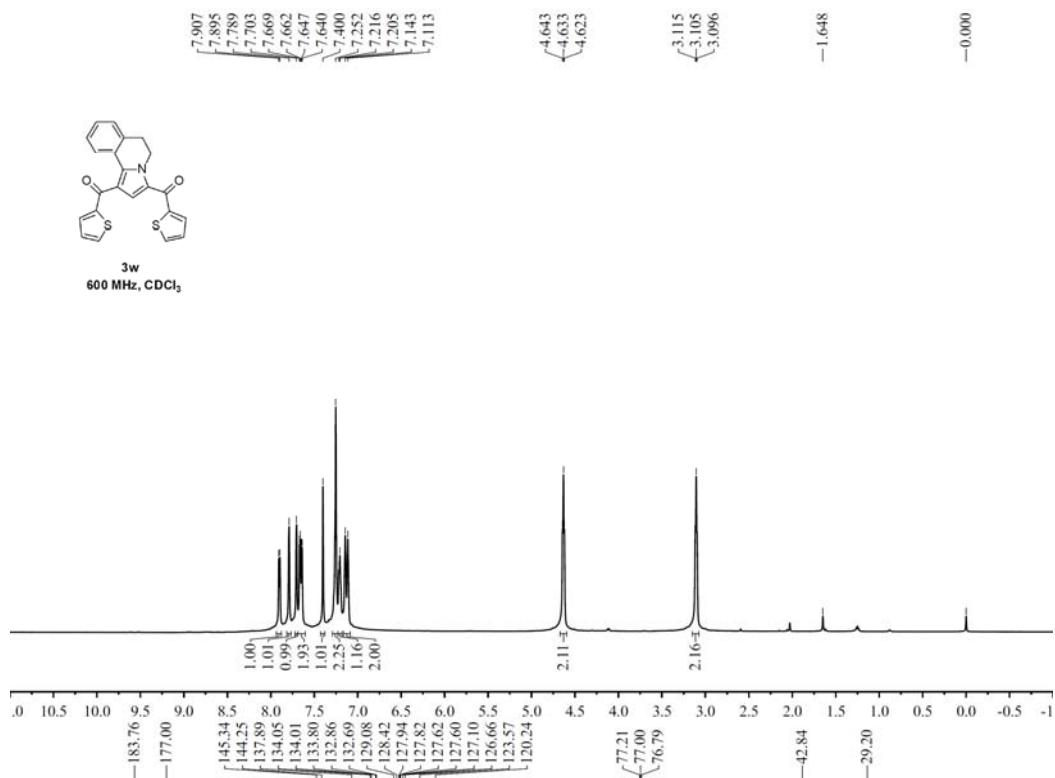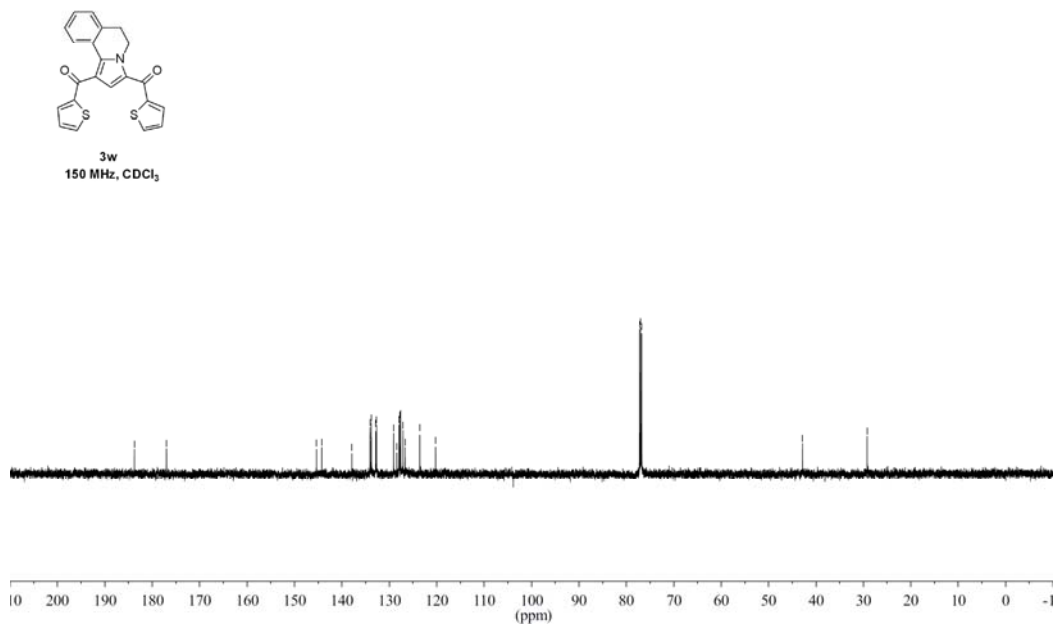

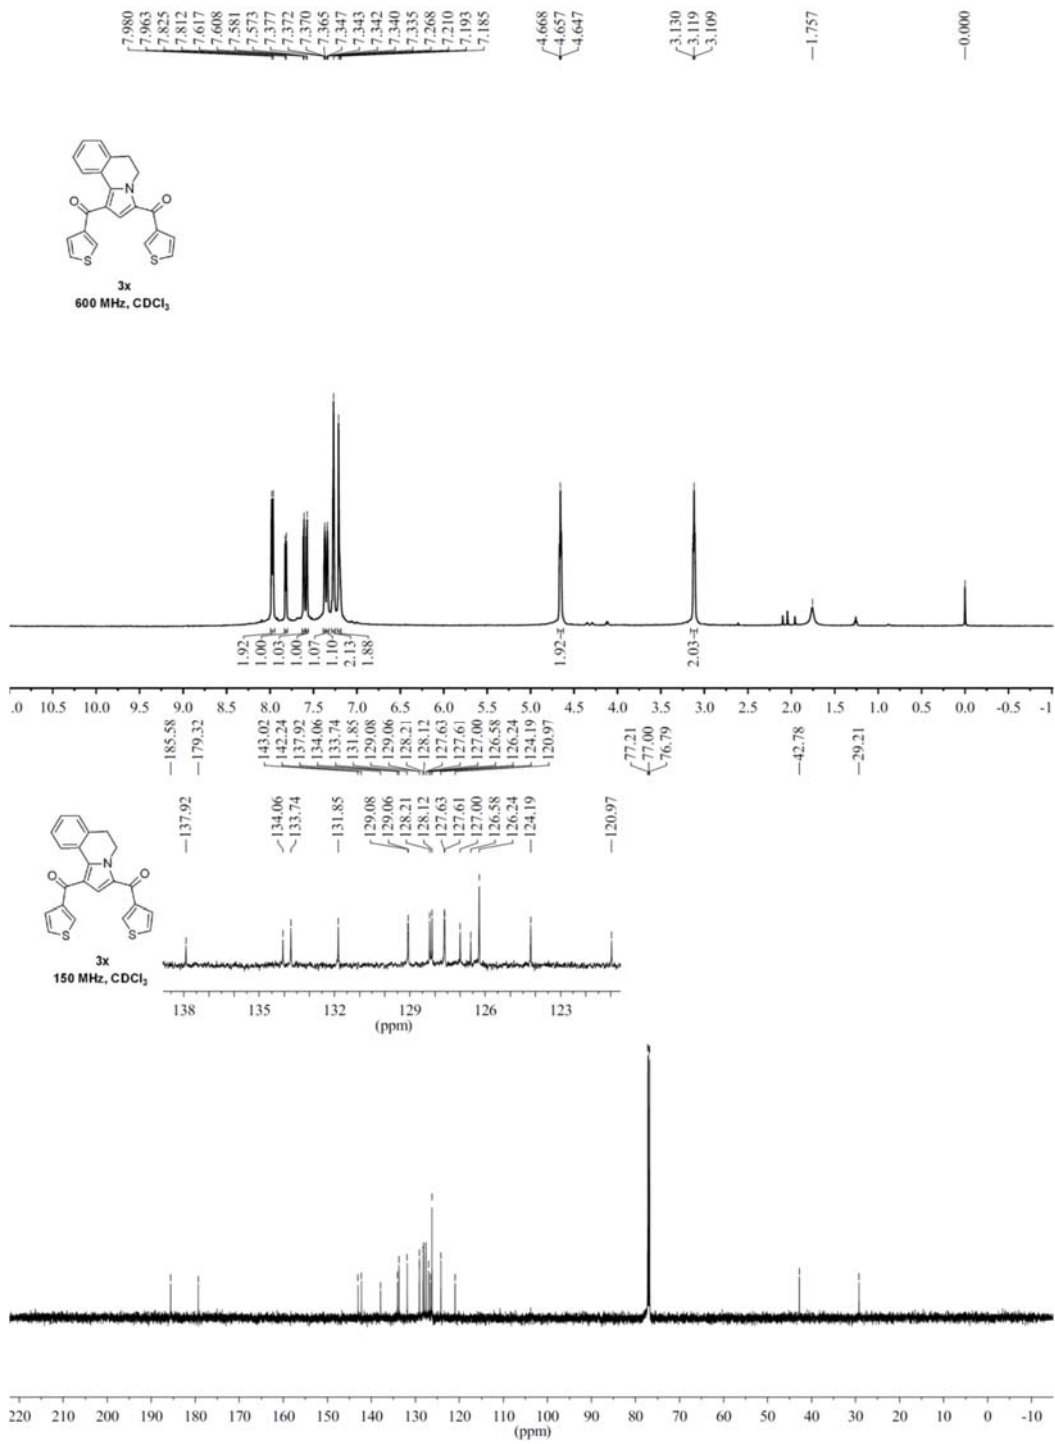

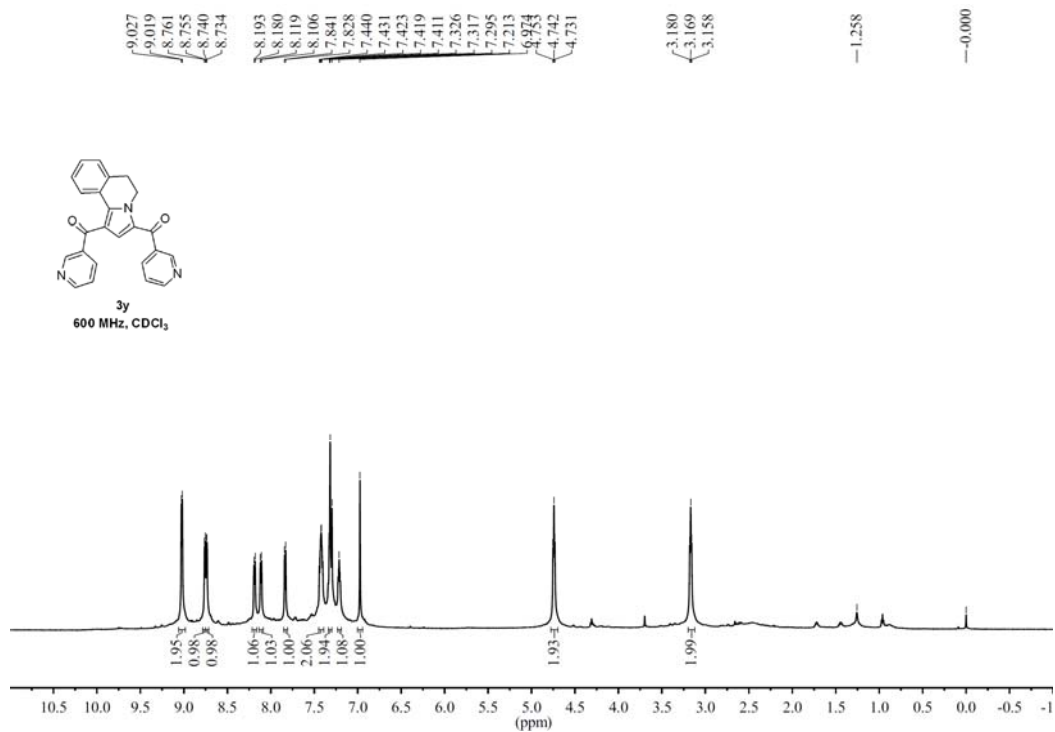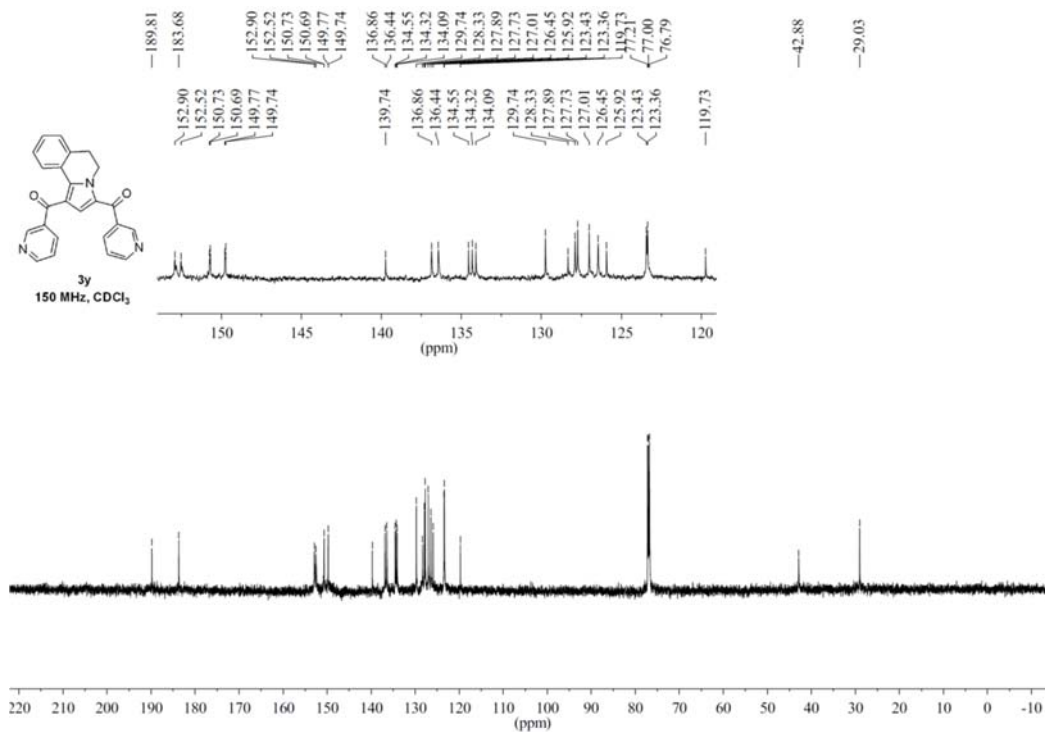

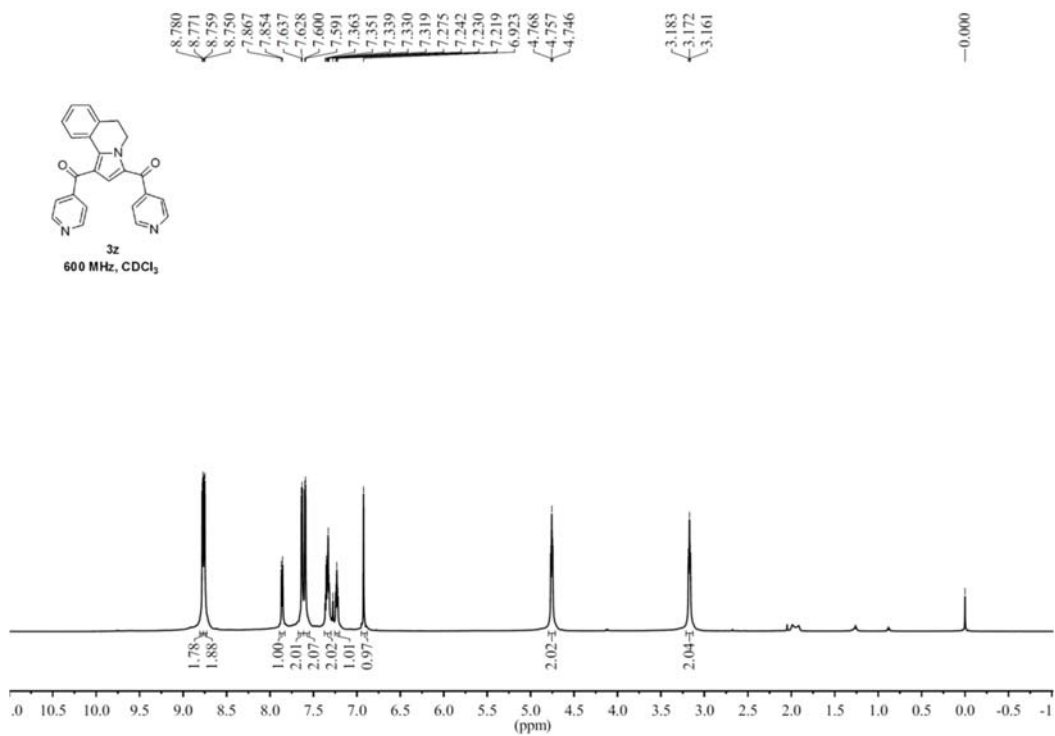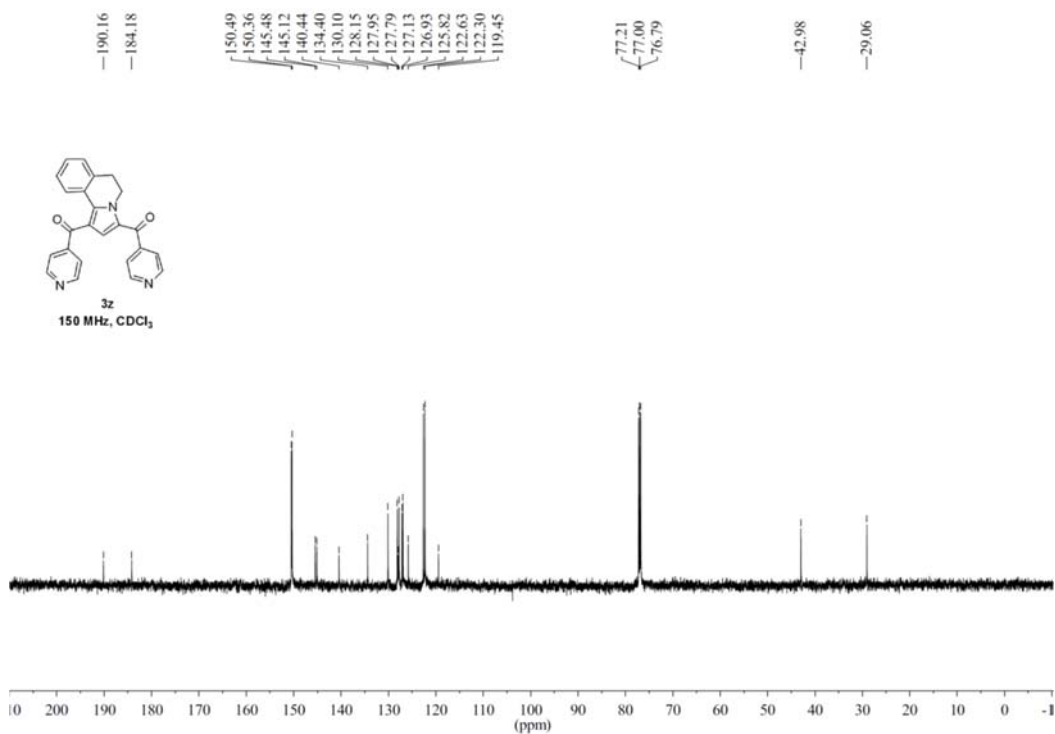

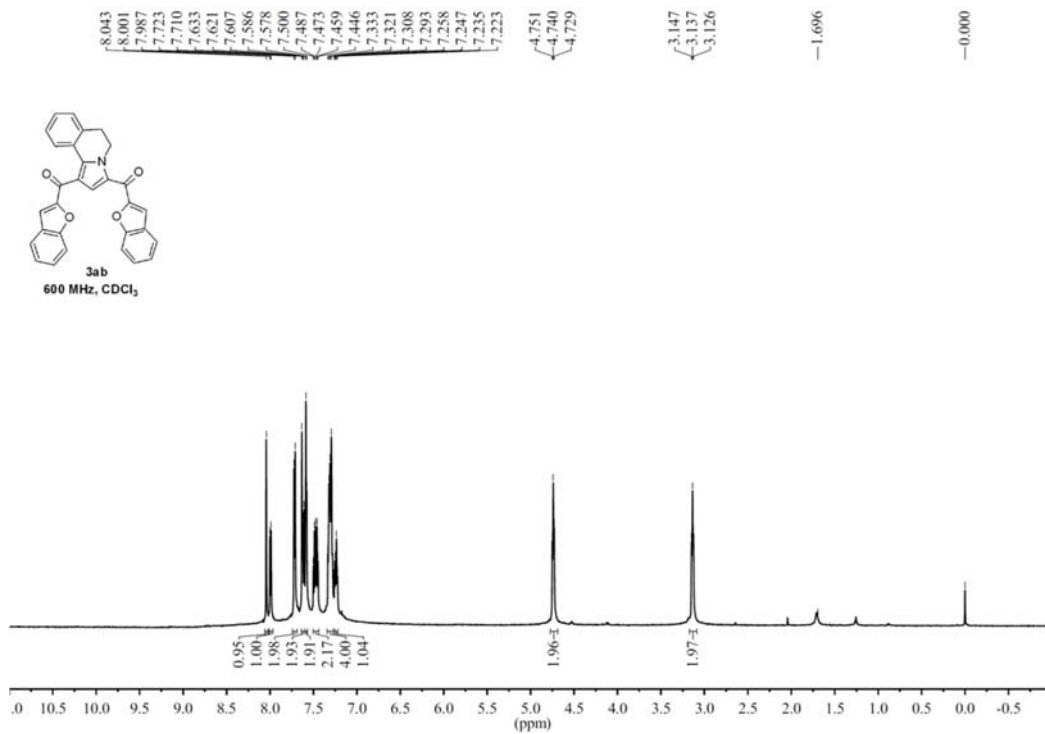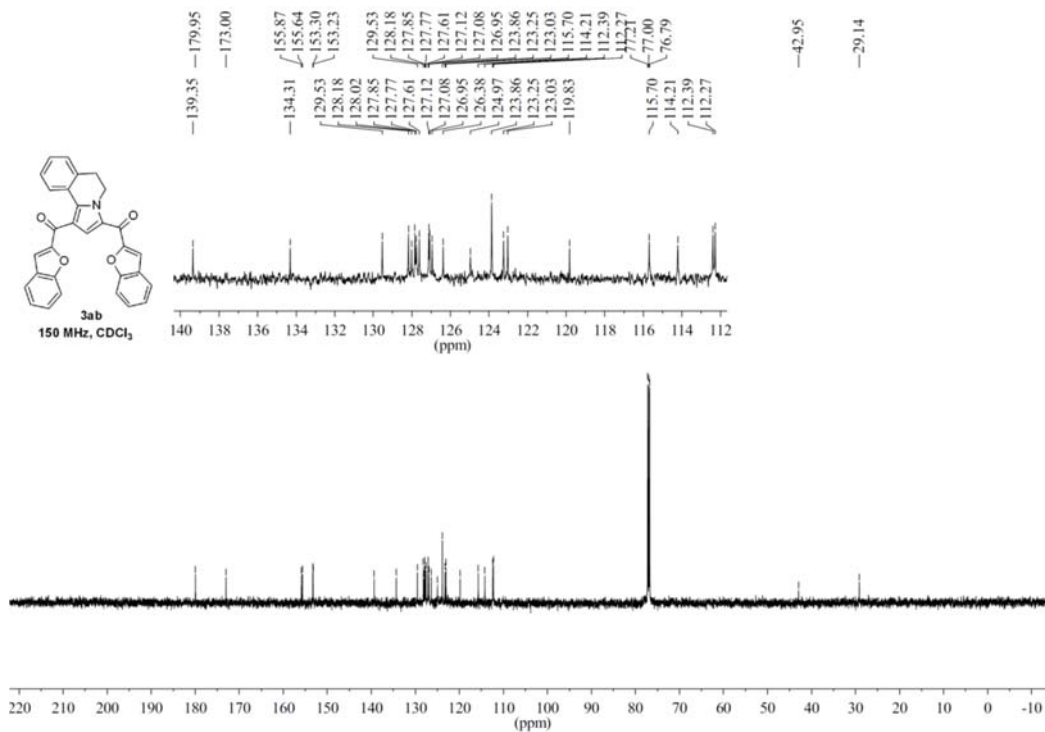



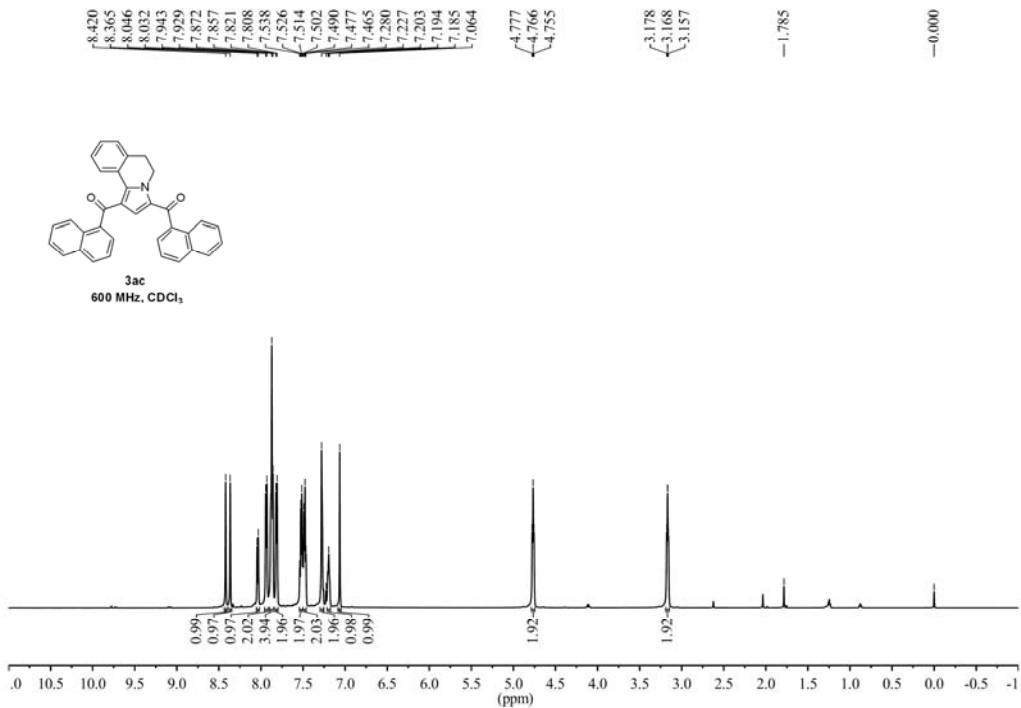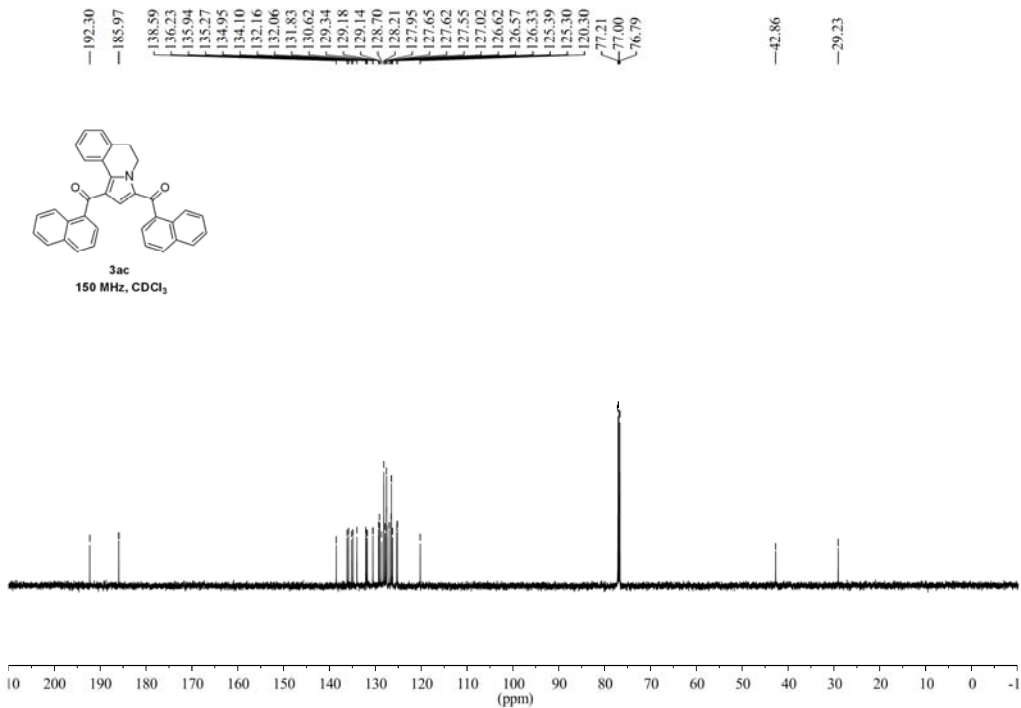

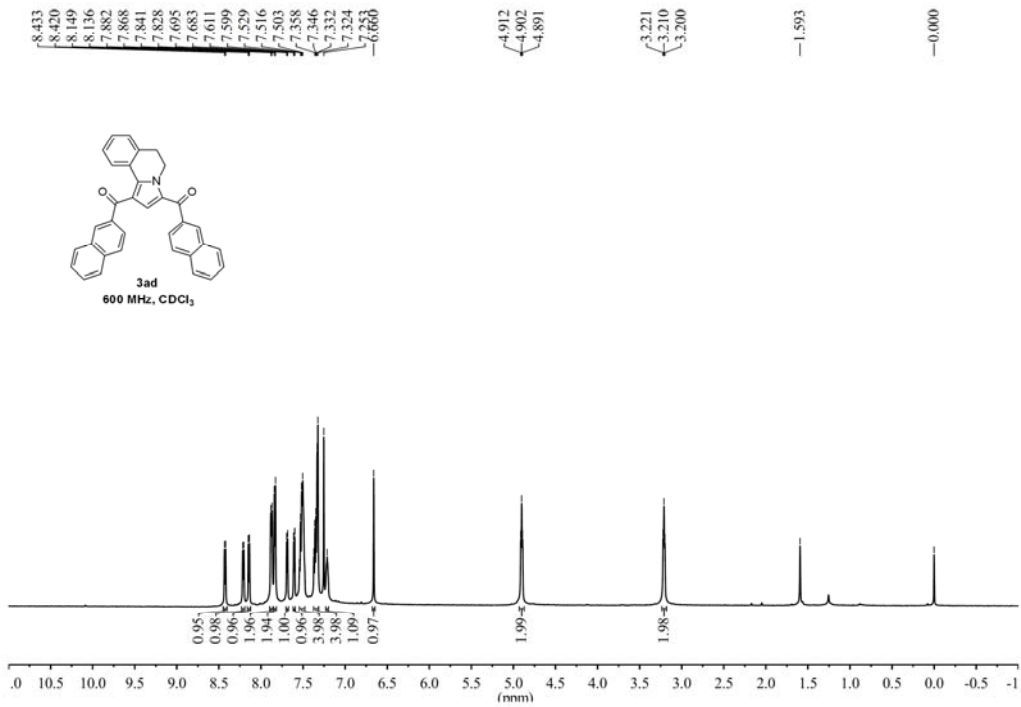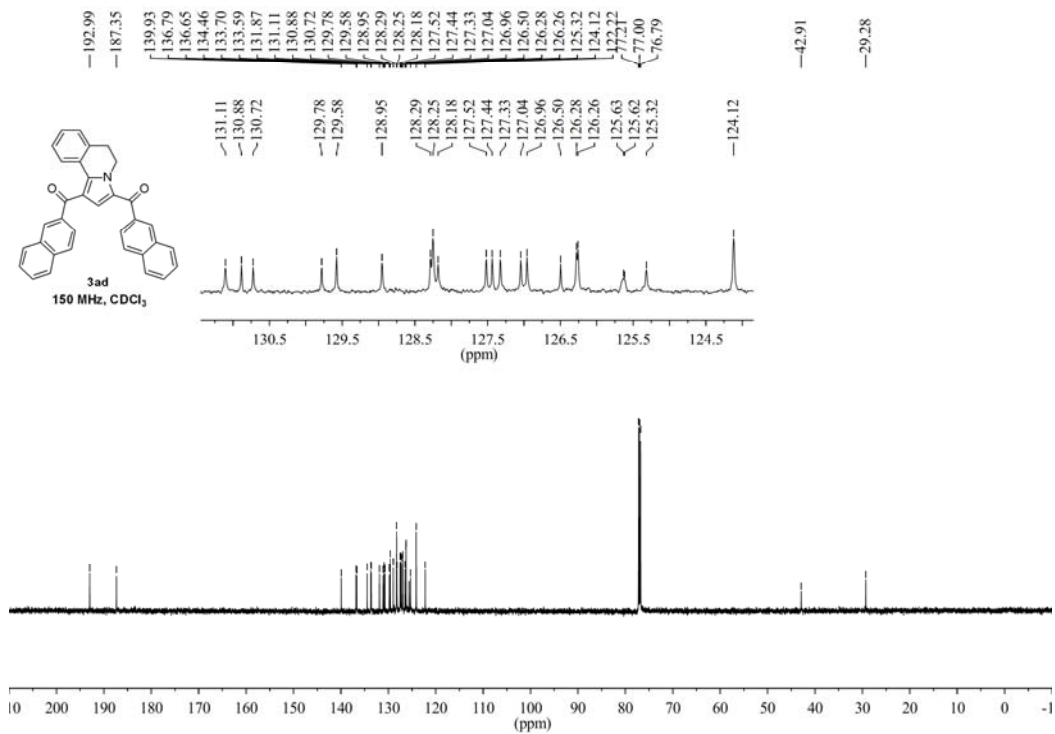

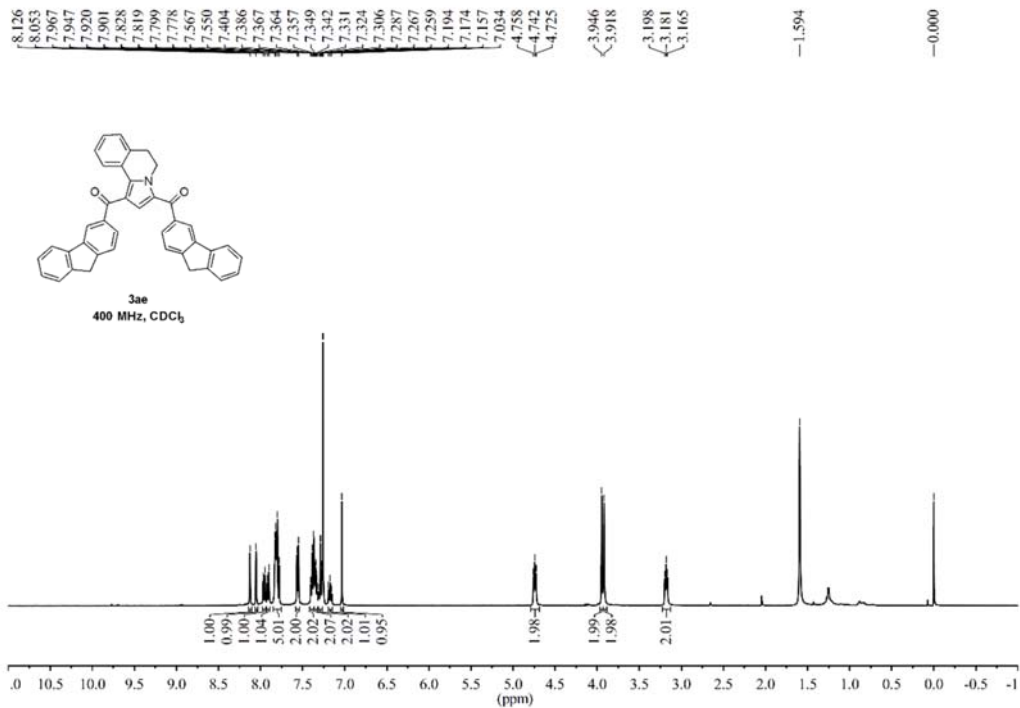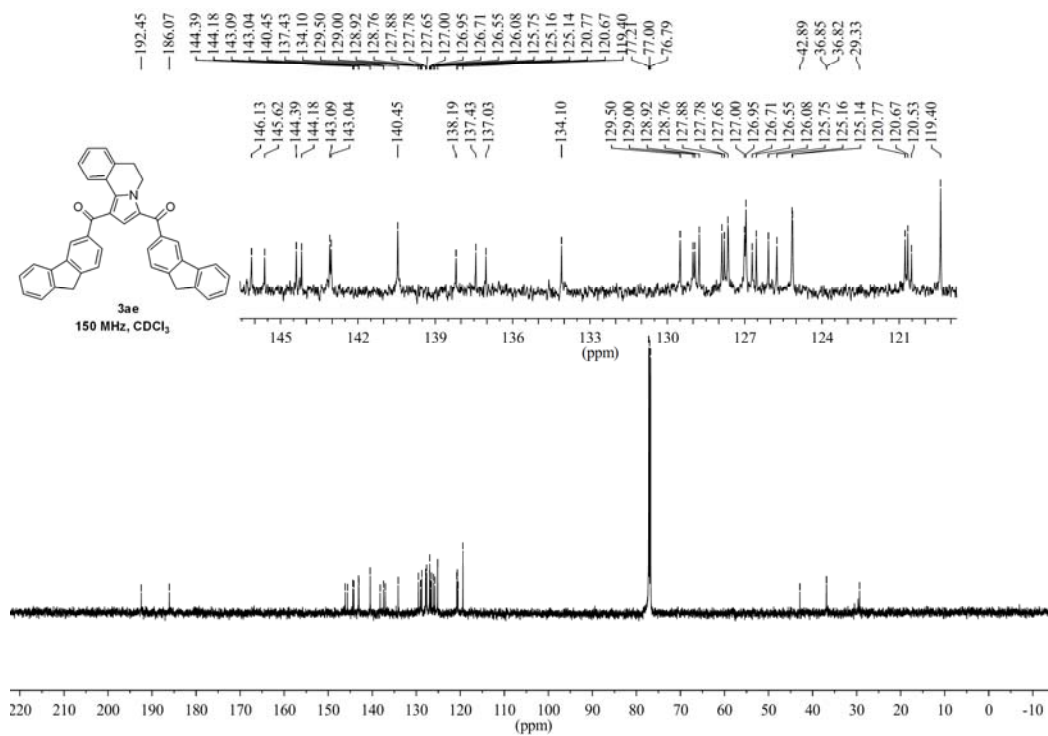

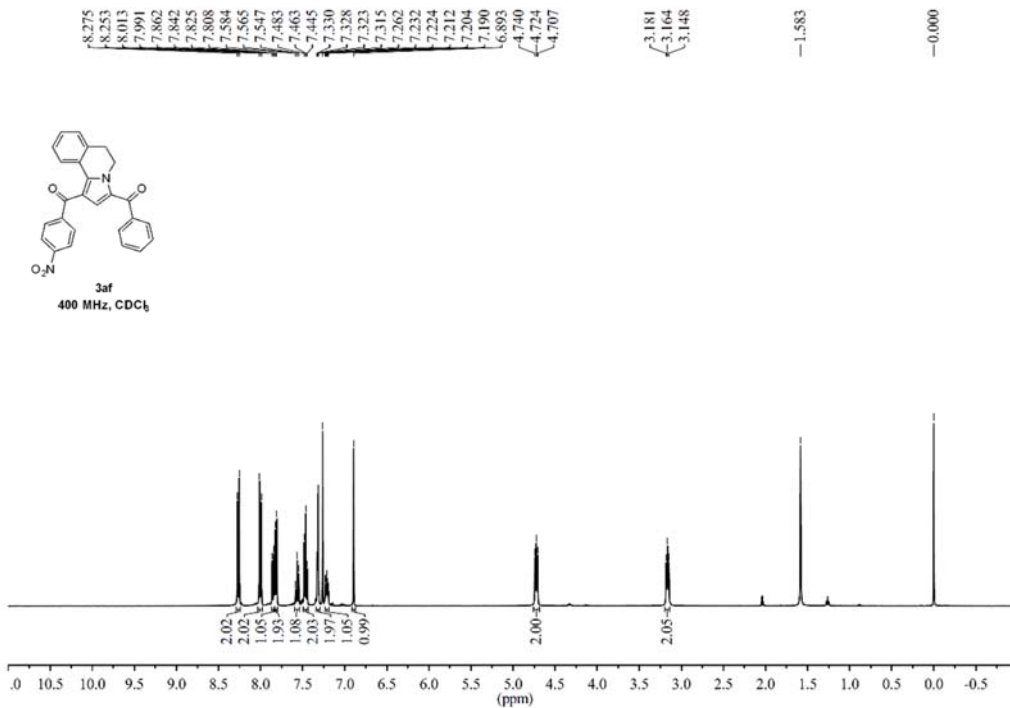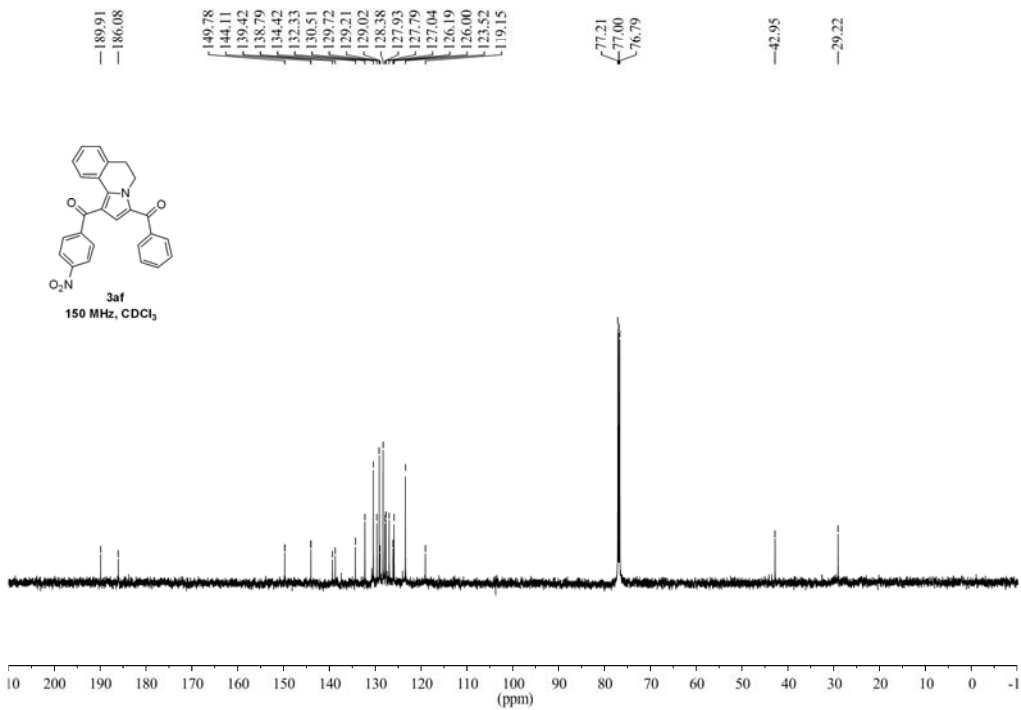

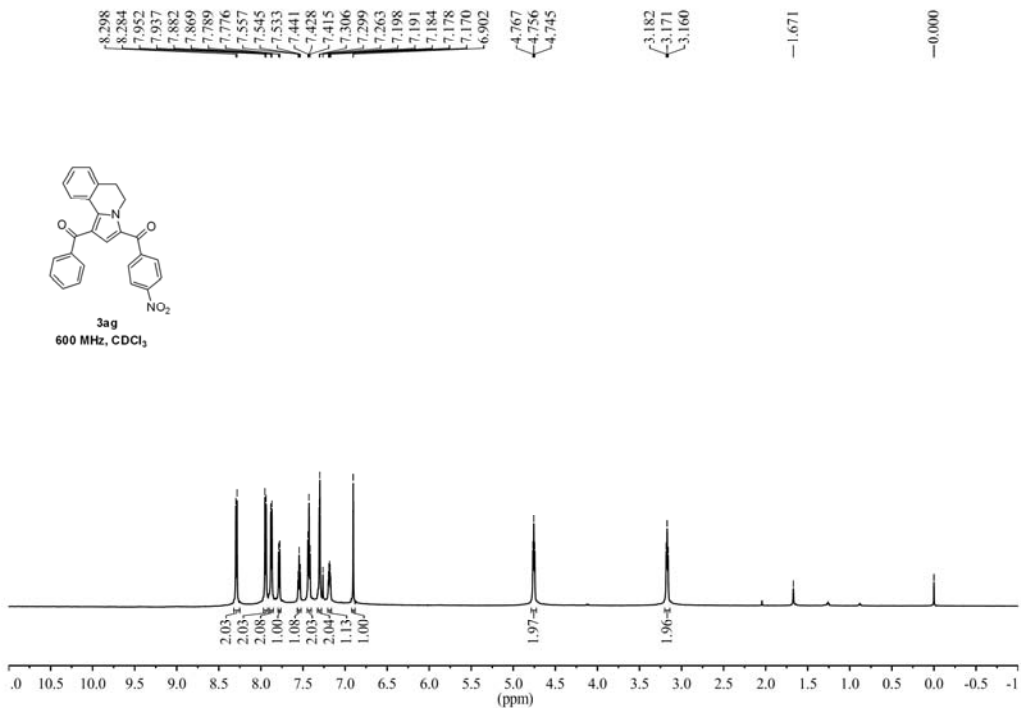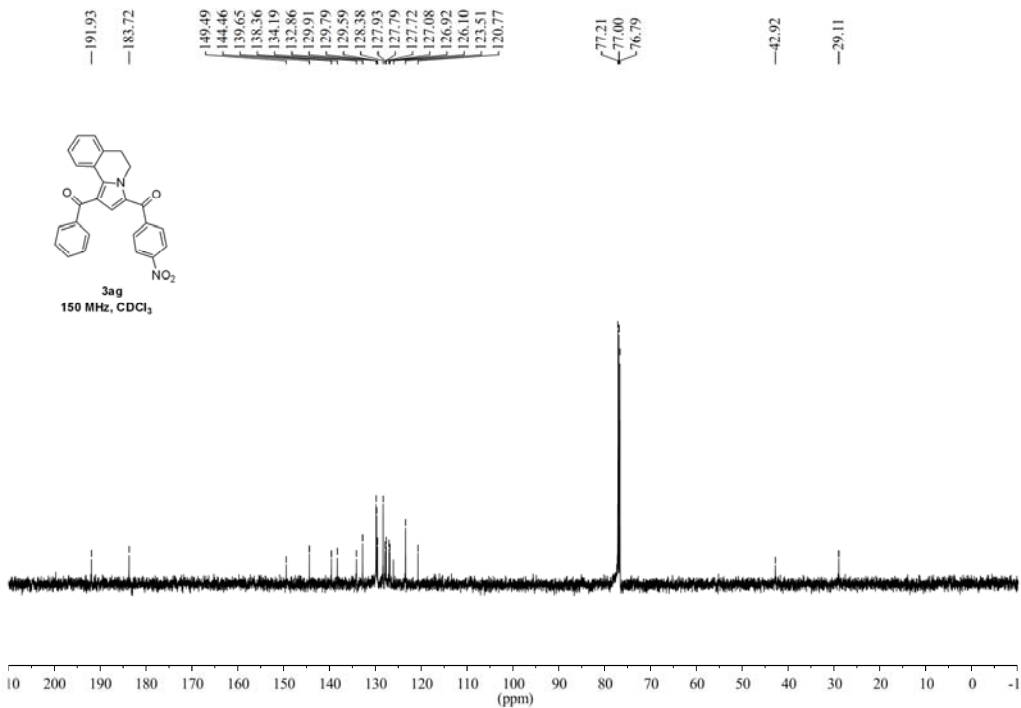

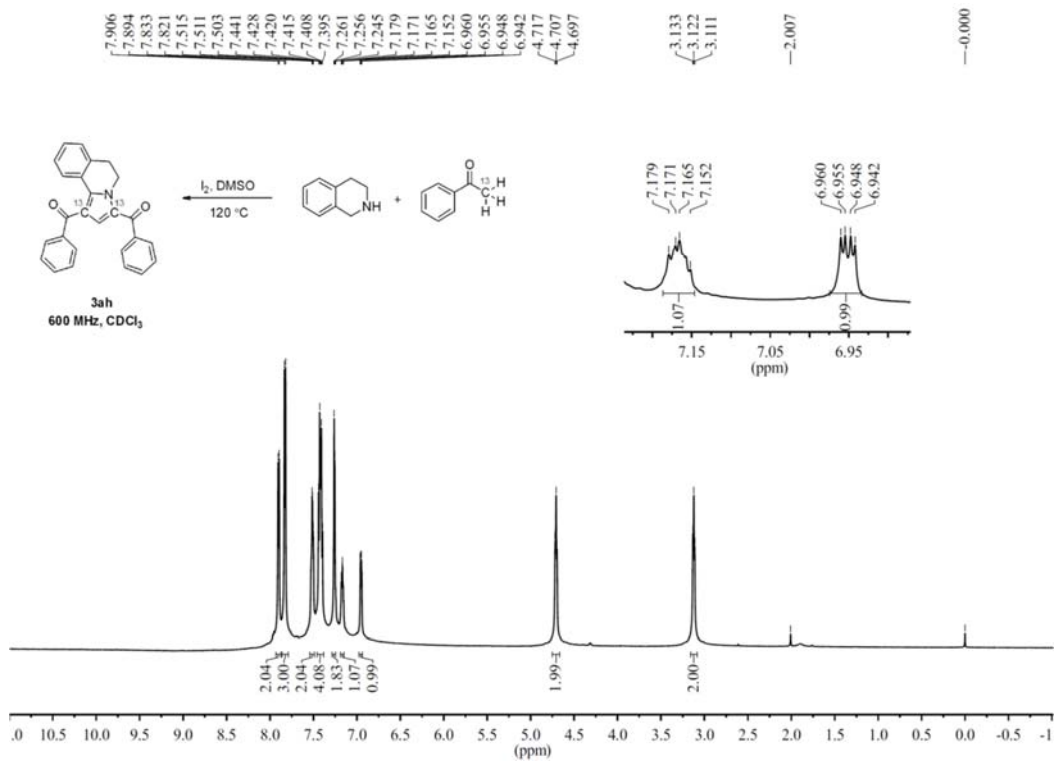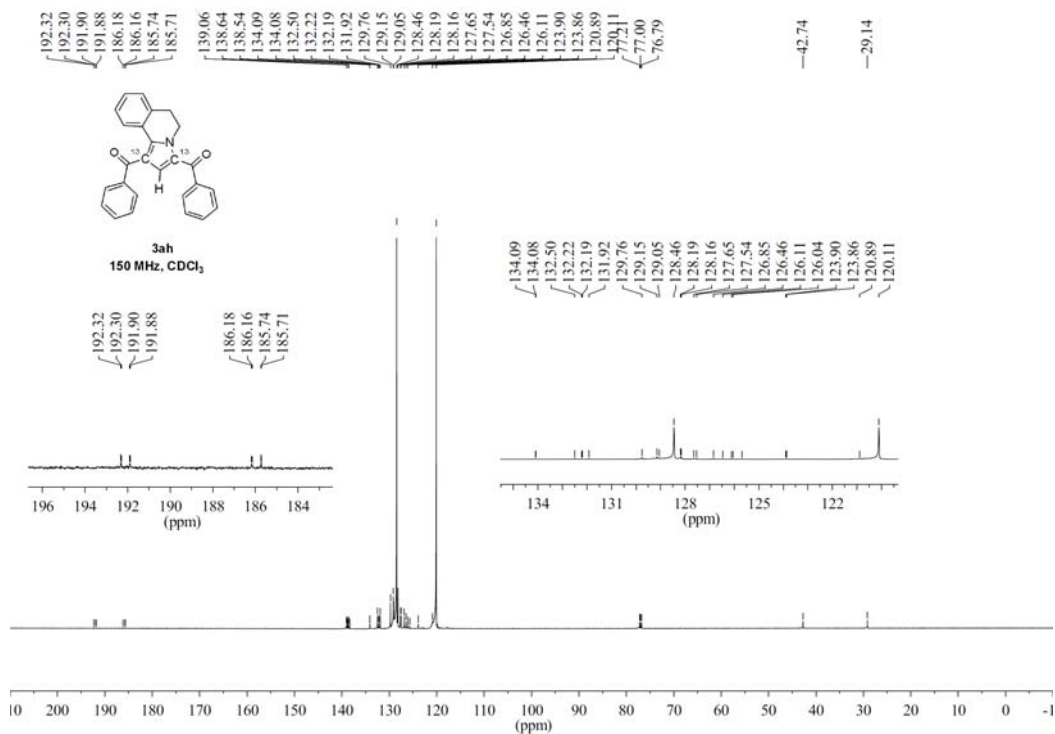

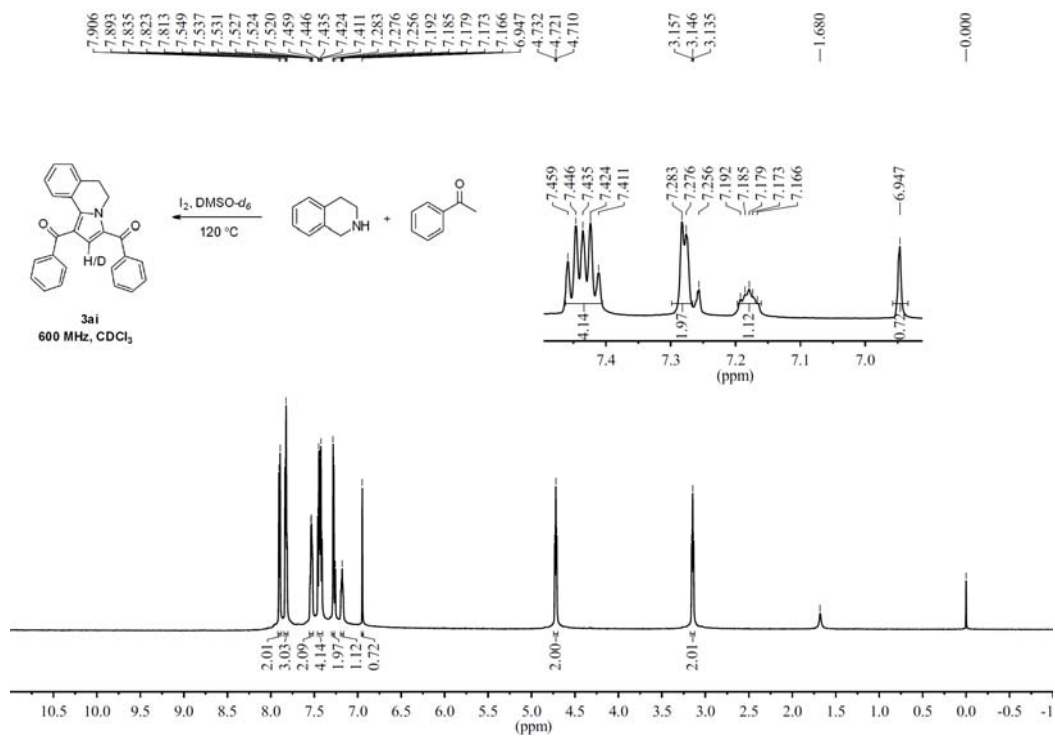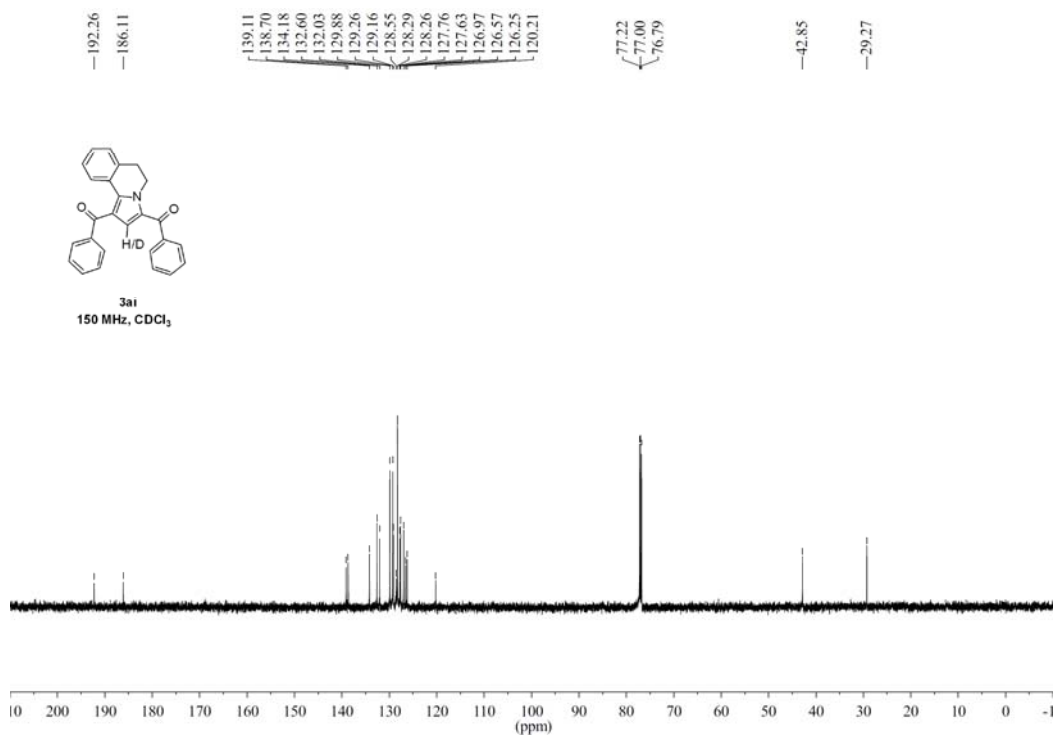

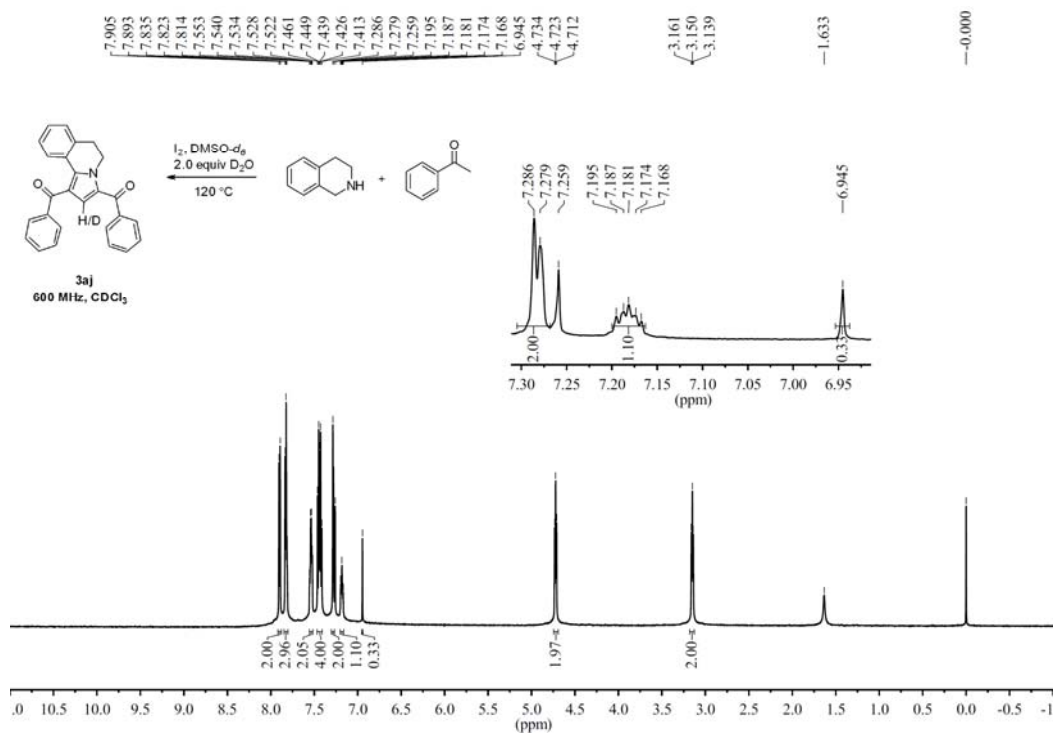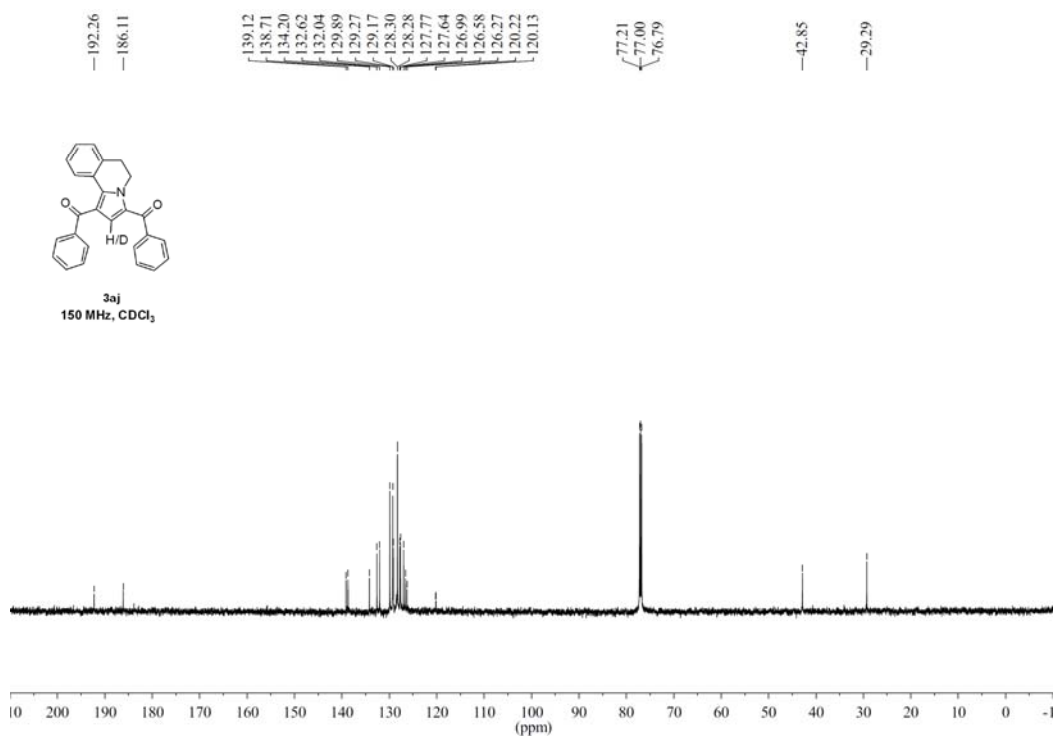



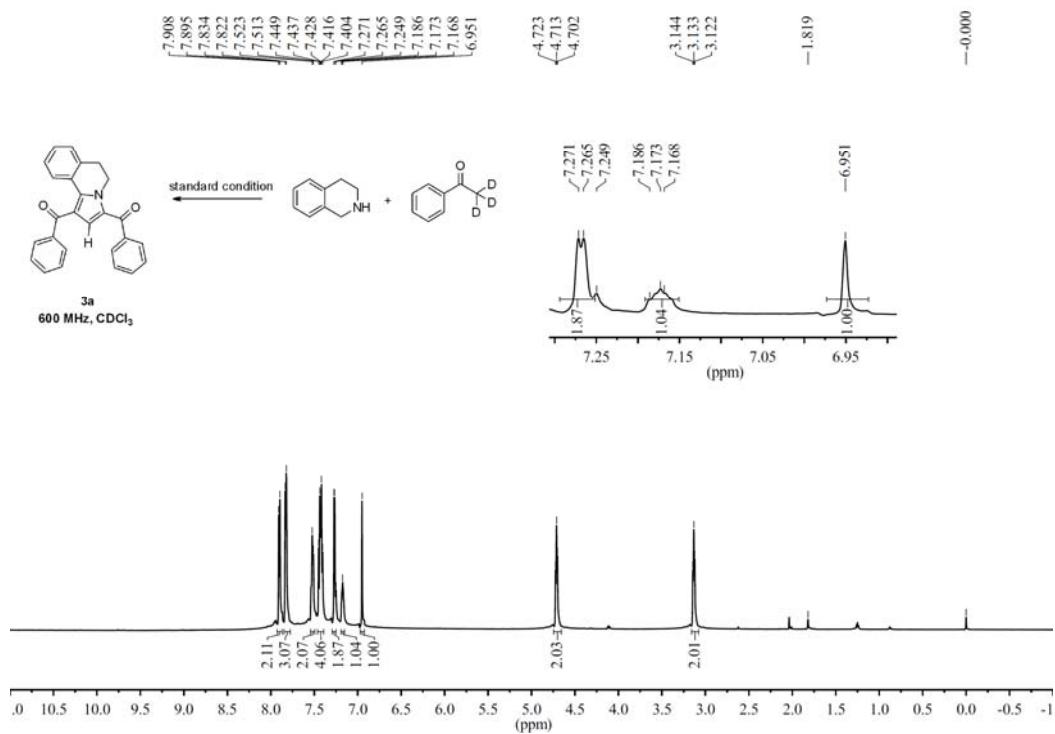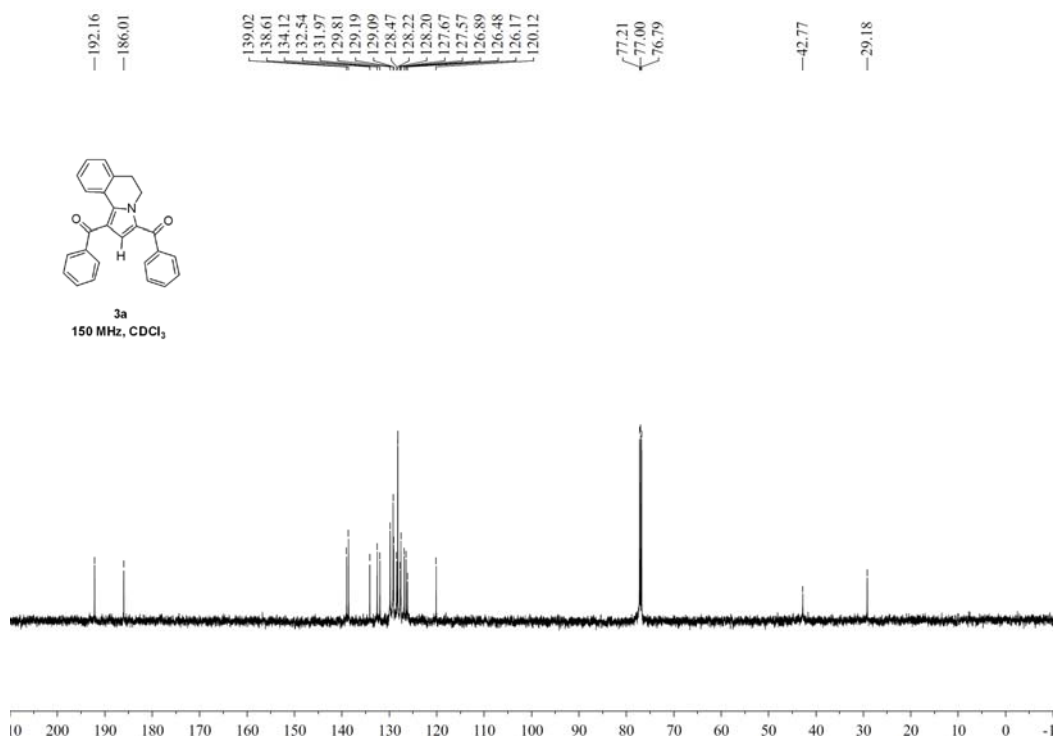

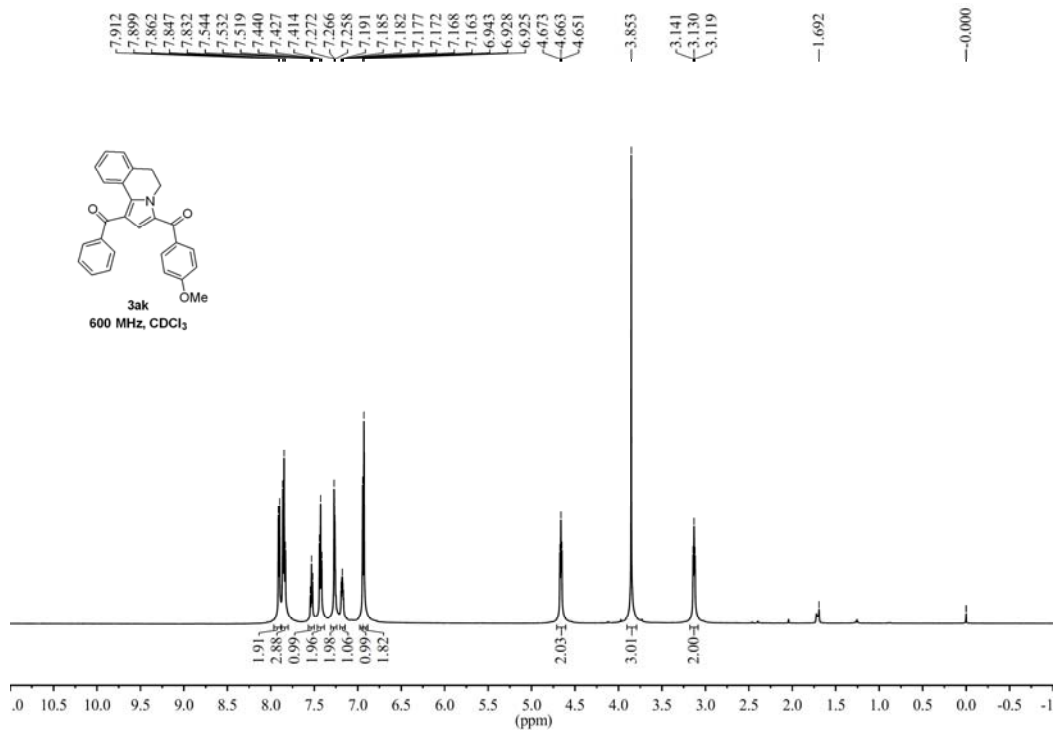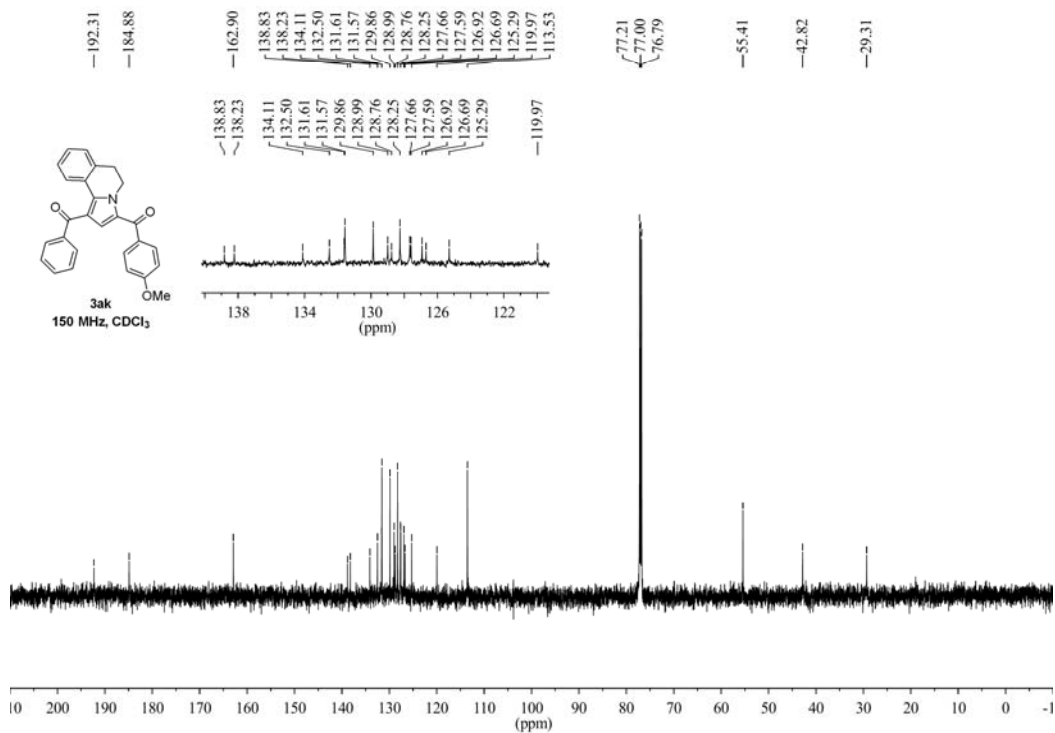

Supplement: c8cc06908e1.pdf [file c8cc06908e1.pdf]
